# Supplementary material for: Symptom-specific non-pharmacological interventions for behavioural and psychological symptoms of dementia: protocol of an umbrella review of systematic reviews of randomised controlled trials
Source: PubMed Central journal article supplement — BMJ Open. 2023 Feb 15;13(2):e070317. doi: 10.1136/bmjopen-2022-070317 (PMC9933668; doi:10.1136/bmjopen-2022-070317), 2023-02-15
Supplement: bmjopen-2022-070317.draft_revisions.pdf [file bmjopen-2022-070317.draft_revisions.pdf]

# BMJ Open

BMJ Open is committed to open peer review. As part of this commitment we make the peer review history of every article we publish publicly available.

When an article is published we post the peer reviewers' comments and the authors' responses online. We also post the versions of the paper that were used during peer review. These are the versions that the peer review comments apply to.

The versions of the paper that follow are the versions that were submitted during the peer review process. They are not the versions of record or the final published versions. They should not be cited or distributed as the published version of this manuscript.

BMJ Open is an open access journal and the full, final, typeset and author-corrected version of record of the manuscript is available on our site with no access controls, subscription charges or pay-per-view fees (<http://bmjopen.bmj.com>).

If you have any questions on BMJ Open's open peer review process please email [info.bmjopen@bmj.com](mailto:info.bmjopen@bmj.com)

# BMJ Open

## Symptom-Specific Non-Pharmacological Interventions for Behavioral and Psychological Symptoms of Dementia: An Umbrella Review of Systematic Reviews of Randomized Controlled Trials

|                               |                                                                                                                                                                                                                                                       |
|-------------------------------|-------------------------------------------------------------------------------------------------------------------------------------------------------------------------------------------------------------------------------------------------------|
| Journal:                      | <i>BMJ Open</i>                                                                                                                                                                                                                                       |
| Manuscript ID                 | bmjopen-2022-070317                                                                                                                                                                                                                                   |
| Article Type:                 | Protocol                                                                                                                                                                                                                                              |
| Date Submitted by the Author: | 18-Nov-2022                                                                                                                                                                                                                                           |
| Complete List of Authors:     | Cho, Eunhee; Yonsei University<br>Kim, Min Jung; Yonsei University College of Nursing<br>Yang, Minhee; Yonsei University<br>Jang, Jiyeon; Yonsei University<br>Cho, Jungwon; Yonsei University<br>Lee, Ji Yeon; Yonsei University College of Nursing, |
| Keywords:                     | Dementia < NEUROLOGY, MENTAL HEALTH, Delirium & cognitive disorders < PSYCHIATRY                                                                                                                                                                      |
|                               |                                                                                                                                                                                                                                                       |

SCHOLARONE™  
Manuscripts

1  
2  
3  
4 **TITLE PAGE**  
5  
6  
7

8 **Title:**

9 Symptom-Specific Non-Pharmacological Interventions for Behavioral and Psychological  
10 Symptoms of Dementia: An Umbrella Review of Systematic Reviews of Randomized  
11 Controlled Trials  
12  
13  
14  
15

16 **List of authors:**

17 Eunhee Cho

18 Mo-Im Kim Nursing Research Institute, Yonsei University College of Nursing, Seoul, South  
19 Korea  
20  
21  
22

23 Min Jung Kim

24 Mo-Im Kim Nursing Research Institute, Yonsei University College of Nursing, Seoul, South  
25 Korea  
26  
27

28 Minhee Yang

29 College of Nursing and Brain Korea 21 FOUR Project , Yonsei University, Seoul, South  
30 Korea  
31  
32

33 Jiyeon Jang

34 College of Nursing and Brain Korea 21 FOUR Project , Yonsei University, Seoul, South  
35 Korea  
36  
37

38 Jungwon Cho

39 College of Nursing, Yonsei University, Seoul, South Korea  
40  
41

42 Ji Yeon Lee

43 Mo-Im Kim Nursing Research Institute, Yonsei University College of Nursing, Seoul, South  
44 Korea  
45

46 **Corresponding author:** Ji Yeon Lee, RN, GNP-BC, PhD

47 Yonsei University College of Nursing, 50-1 Yonsei-Ro, Seodaemun-Gu, Seoul, South Korea,  
48 03722

49 email: [jiyeonlee@yuhs.ac](mailto:jiyeonlee@yuhs.ac); tel: 82-2-2228-3344; fax: 82-2-2227-8303  
50

51 **Word count**, excluding title page, abstract, references, figures and tables: 1,939  
52  
53  
54  
55  
56  
57  
58  
59  
60

## ABSTRACT

### Introduction

There is a variety of non-pharmacological interventions for dementia care. However, healthcare providers continue to face challenges in determining the most suitable interventions for behavioral and psychological symptoms of dementia because the symptoms vary according to each individual. This umbrella review aims to identify and summarize effective non-pharmacological interventions for each sub-symptom to provide individualized, evidence-based recommendations for clinical practice.

### Methods and analysis

This review follows the guideline of the Cochrane methodology for umbrella reviews. It focuses only on systematic reviews with or without a meta-analysis of randomized controlled trials. Five electronic databases, PubMed, Cumulative Index to Nursing and Allied Health Literature (CINAHL), Embase, PsycINFO, and Cochrane Database, will be searched. The screened systematic reviews will be determined for eligibility by the PICO formulation: (Population) older adults with dementia of any type; (Intervention) all types of non-pharmacological intervention; (Comparison) usual care or other non-pharmacological intervention; and (Outcome) behavioral and psychological symptoms of dementia and its sub-symptoms. The quality of the individual systematic reviews will be appraised using A Measurement Tool to Assess Systematic Reviews 2 (AMSTAR 2). The overlap of primary studies will also be considered by eliminating an old-date systematic review conducted by the same authors with the same interest and calculating the Corrected Covered Area. Data will be extracted according to the pre-determined formula, which will organize non-pharmacological interventions according to the sub-symptoms of behavioral and psychological symptoms of dementia, not according to the type of intervention.

### Ethics and dissemination

Since this is a review paper, ethical approval is not required. The findings of this review will be disseminated through publication in a peer-reviewed journal

### Registration details

The protocol of this umbrella review is registered in the International Prospective Register of Systematic Reviews (Prospero: CRD42022340930).

**Keywords:** Behavioral and psychological symptoms of dementia, dementia, non-pharmacological therapies, protocol, umbrella review.

### Strengths and limitations of this study

- Although there is considerable evidence regarding the benefits of non-pharmacological interventions for behavioral and psychological symptoms of dementia, it is still difficult to choose and apply interventions in clinical settings where these symptoms are presented as a symptom or symptom clusters.
- This review will be the first tertiary-level review to synthesize the results from systematic reviews according to the sub-symptoms of behavioral and psychological symptoms that vary according to individuals with dementia.
- The findings from this umbrella review will provide recommendations for readily applicable guidelines in dementia care.
- This review will include only systematic reviews published in English; therefore, non-English systematic reviews or individual randomized controlled trials that are not included in any systematic review will be excluded, albeit with a rigorous literature search.

review only

## MAIN TEXT

### INTRODUCTION

A growing number of people are living with dementia. Currently, the prevalence of dementia is reported to be 55 million worldwide.<sup>1</sup> Caring for people living with dementia is burdensome due to the progressive decline in their cognitive function and gradual loss of daily and social functioning. In particular, it is challenging to provide care for persons who manifest Behavioral and Psychological Symptoms of Dementia (BPSD), which can lead to caregiver fatigue, depression, and burnout.<sup>2</sup>

BPSD, often called neuropsychiatric symptoms of dementia,<sup>3</sup> is a set of heterogeneous non-cognitive symptoms that include aberrant motor behaviors, agitation or aggression, anxiety, apathy, appetite disorder, delusions, depression, disinhibition, elation/euphoria, hallucinations, irritability, and sleep disorder.<sup>4</sup> Although BPSD is most common during the mid-stage of dementia, symptoms can appear at any stage, with fluctuating severity of symptoms. Over 90% of persons living with dementia will suffer from BPSD at some point, whether their symptoms present as a single one or in clusters.<sup>3</sup> Previous studies have consistently reported the negative consequences of BPSD, such as poor quality of life in persons living with dementia and their caregivers, impaired daily functioning, a threat to safety,<sup>5</sup> nursing home admission,<sup>6</sup> caregiver burden,<sup>7</sup> and even increased mortality.<sup>8</sup>

Non-pharmacological interventions, such as behavioral therapy, validation therapy, psychotherapy, reminiscence, person-centered care, music therapy, bright-light therapy, and multisensory approaches are widely considered first-line interventions for BPSD today.<sup>9-11</sup> These interventions are considered non-invasive, safe, and have fewer adverse effects than pharmacological interventions.<sup>5</sup> In particular, among older adults who take multiple medications for medical conditions other than dementia, non-pharmacological interventions

1  
2  
3  
4 present a safer option to prevent drug-to-drug interactions and adverse effects of  
5  
6 neuropsychiatric medications.<sup>12 13</sup> The non-pharmacological interventions also allow the  
7  
8 involvement of various professionals, making them easier to be implemented in a variety of  
9  
10 clinical settings.  
11  
12

13  
14 The growing attention toward benefits of non-pharmacological interventions, have  
15  
16 led to many primary trials and reviews being published. In dementia research, umbrella  
17  
18 reviews have been conducted to investigate the effectiveness of non-pharmacological therapy  
19  
20 for BPSD by synthesizing the results from secondary-level synthesis reviews (e.g., systematic  
21  
22 review [SR]). The findings from these tertiary-level reviews have generally shown that non-  
23  
24 pharmacological interventions were effective in improving BPSD.<sup>14-17</sup> In terms of individual  
25  
26 non-pharmacological therapy, music therapy and cognitive behavior therapy were effective in  
27  
28 treating symptoms of depression or anxiety,<sup>16 18 19</sup> whereas home-based behavioral  
29  
30 management, person-centered care, and dementia care mapping were effective for addressing  
31  
32 severe agitation.<sup>18</sup>  
33  
34  
35

36  
37 Although previously published umbrella reviews have focused on the types of non-  
38  
39 pharmacological interventions, such approaches have failed to provide practical guidance in  
40  
41 clinical settings because BPSD presents as a symptom or cluster of symptoms. In current  
42  
43 evidence, the effectiveness of non-pharmacological interventions for each sub-symptom of  
44  
45 BPSD is also limited to certain symptoms (i.e., depression, anxiety, and agitation).<sup>16 18 19</sup>  
46  
47 Healthcare providers still face the challenge even with the evidence to apply and choose  
48  
49 interventions since there is no guidance on which non-pharmacological interventions should  
50  
51 be chosen depending on the clinical manifestations.<sup>20</sup> BPSD has a complex etiology with a  
52  
53 wide range of 12 symptoms. Furthermore, each symptom has several determinants; therefore,  
54  
55 it is difficult to identify which interventions would be effective for each symptom.<sup>21</sup>  
56  
57  
58  
59 Considering the complexity of BPSD etiology, there is no non-pharmacological treatment  
60

1  
2  
3  
4 that covers all symptoms. However, to be helpful in clinical settings, a review of non-  
5  
6 pharmacological interventions of BPSD according to its sub-symptoms is required. Thus, this  
7  
8 umbrella review aims to identify and evaluate evidence regarding symptom-specific non-  
9  
10 pharmacological interventions to reduce BPSD in older adults living with dementia. In  
11  
12 particular, we will focus on investigating the effectiveness of non-pharmacological  
13  
14 interventions on the sub-symptoms of BPSD. The primary review question underlying this  
15  
16 umbrella review is “What are the most effective non-pharmacological interventions to reduce  
17  
18 each BPSD and sub-symptoms of BPSD?” Secondary review questions are “Which sub-  
19  
20 symptoms of BPSD were targeted for non-pharmacological interventions?” and “What are  
21  
22 the types and characteristics of non-pharmacological interventions used to reduce each sub-  
23  
24 symptom of BPSD?”  
25  
26  
27  
28  
29  
30  
31

## 32 **METHODS**

### 33 **Study design**

34  
35 This umbrella review will follow the guideline of Cochrane methodology for  
36  
37 umbrella review.<sup>22</sup> Before starting the review, we registered the protocol of this review at the  
38  
39 International Prospective Register of Systematic Reviews (PROSPERO; ref no.  
40  
41 CRD42022340930).  
42  
43  
44

### 45 **Search methods**

46  
47 We developed search strategies through several research meetings and consultations  
48  
49 with a university librarian. The search databases will include PubMed, Cumulative Index to  
50  
51 Nursing and Allied Health Literature (CINAHL), PsycINFO, Embase, and the Cochrane  
52  
53 Database of Systematic Reviews. The search date will comprise the last ten years (January  
54  
55 2012–August 2022) to capture the most recent comprehensive findings based on the  
56  
57 methodological recommendations on conducting umbrella reviews.<sup>23</sup> Peer-reviewed  
58  
59  
60



1  
2  
3  
4 systematic reviews published in English will be included.  
5

6 The PICO framework of our umbrella review was as follows:  
7

- 8 1. Population: Older adults with dementia of any type
- 9
- 10 2. Intervention: All types of non-pharmacological interventions
- 11
- 12
- 13 3. Comparison: Usual care, waitlist control, or other types of non-pharmacological
- 14 interventions
- 15
- 16 4. Outcome: One or more BPSD-related symptoms measured using a valid
- 17 measurement tool
- 18
- 19
- 20
- 21
- 22

23 The search terms were developed based on this PICO framework. The key search  
24 terms were “older adult” AND “dementia” AND “non-pharmacological intervention” AND  
25 “BPSD” AND “systematic review.” We consulted a university librarian, an expert in  
26 literature search, about the search terms before starting the search. Supplementary tables A1–  
27 A5 show examples of an organized search term for each search engine.  
28  
29  
30  
31  
32

33 After searching for potential sources of evidence, data will be extracted and  
34 duplicates will be removed using EndNote and Excel. Two independent authors will perform  
35 the initial screening of the title and abstract and the discordance in crosschecks at this phase  
36 will be resolved through research team meetings. After excluding irrelevant systematic  
37 reviews, we will investigate the full texts. Four independent authors will be involved in the  
38 full-text screening. Specifically, the four authors will be divided into two teams, and each  
39 team of two authors will review the assigned number of systematic reviews. Where  
40 agreement cannot be reached between the two authors within the team, a third author from  
41 another team will be brought in to decide eligibility. To increase the consistency of study  
42 selection between the two teams, the full text will be cross-checked and reviewed by one  
43 author from another team. Thus, at least three authors will review one systematic review to  
44 determine its suitability for eligibility.  
45  
46  
47  
48  
49  
50  
51  
52  
53  
54  
55  
56  
57  
58  
59  
60

## **Inclusion and exclusion criteria**

A specific description of each category for study selection is presented in Table 1. In addition to the PICO framework, the scope of our umbrella review will be limited to SRs with randomized controlled trials (RCTs) only and will mainly target interventions in community and long-term care settings where persons living with dementia maintain their daily routine.

## **Quality appraisal**

A Measurement Tool to Assess Reviews 2 (AMSTAR 2) will be used to evaluate the methodological quality of the systematic reviews.<sup>24</sup> Two independent authors will assess the quality of the included SRs and provide their decision on 16 items of AMSTAR 2. Before beginning the process, the two authors will pilot the use of AMSTAR 2 on two or three systematic reviews or meta-analyses to ensure consistent ratings between the authors. For each item, the answer will be “yes,” “partial yes,” or “no.” Any disagreement between the two authors and uncertainties will be resolved by consensus and team meetings. Each SR will be categorized into “high” (none or one “non-critical weakness”), “moderate” (more than one “non-critical weakness”), “low” (one “critical flaw with/without “non-critical weakness”), or “critically low” (more than one “critical flaw” with/without “non-critical weakness”) using the online AMSTAR 2 ([https://amstar.ca/Amstar\\_Checklist.php](https://amstar.ca/Amstar_Checklist.php)).<sup>24</sup>

## **Data extraction**

We will extract data from the SRs in two stages. First, descriptive characteristics of SRs will be extracted, including author, publication year, number of RCTs included, number of primary studies included, number of participants included, purpose, date of search, population (i.e., age range, dementia type), type of intervention and control, key findings (i.e., outcomes, effect sizes), and the certainty of the evidence described. Key findings related to our review questions will then be extracted, especially focusing on the sub-symptoms of

1  
2  
3  
4 BPSD. Data extraction will be further refined as a review process and will be explained in the  
5  
6 final review.  
7

8  
9 Before starting the data extraction, a template will be created using Excel through a  
10  
11 team discussion. The data will be extracted by one author using this template. Two other  
12  
13 authors will review the extracted data and crosscheck. Accordingly, three authors will  
14  
15 conduct the data extraction. Any uncertainties or discordance between authors will be  
16  
17 resolved through a review team meeting.  
18  
19

20  
21 Regarding the overlap of primary RCTs, we will use the Corrected Covered Area  
22  
23 (CCA) to address the degree of overlapping. CCA matrix will be formulated with columns  
24  
25 (included SRs) and rows (included RCTs in each SR), and CCA will be calculated and  
26  
27 demonstrated in a table.<sup>25</sup> CCA is calculated by multiplying the number of the first  
28  
29 occurrence of primary RCTs by the total number of reviews and then subtracting the number  
30  
31 of the first occurrence of primary RCTs. This value will then be used to divide the value  
32  
33 obtained by subtracting the number of first occurrences of primary RCTs from the total  
34  
35 number of RCTs, including double counting. The degree of overlap is determined by the  
36  
37 following criteria: 0–5% is low overlap; 6–10% is moderate overlap; 11–15% is high overlap,  
38  
39 and greater than 15% is very high overlap.<sup>25</sup> If there are SRs conducted by the same authors  
40  
41 to update the previous SR with the same interest, only the most recent SR will be included.<sup>26</sup>  
42  
43  
44

#### 45 **Data synthesis**

46  
47  
48 First, a narrative synthesis will be presented. The BPSD-related outcomes will be  
49  
50 organized in the tables, and statistical data obtained from the meta-analysis will be presented  
51  
52 as odds ratios or risk ratios if described in the included SRs. Then, we will resynthesize all  
53  
54 BPSD outcomes based on the sub-symptoms of BPSD. If possible, we will summarize the  
55  
56 intervention effects for each intervention according to the sub-symptoms of BPSD. The  
57  
58 results will be synthesized considering each review's quality and CCA scores, and continuous  
59  
60

1  
2  
3  
4 team meetings will be conducted to determine the review selection and data synthesis  
5  
6 according to the review quality and CCA scores.  
7

### 8 9 **Confidence in the synthesized findings of the review**

10  
11 This umbrella review will examine and summarize the certainty of the evidence  
12  
13 described in each SR if it evaluated its confidence using a tool such as the Grading of  
14  
15 Recommendations Assessment, Development, and Evaluation approach.  
16  
17

## 18 19 20 **DISCUSSION**

21  
22 BPSD can pose a great challenge in dementia care. Although tertiary review exists,  
23  
24 no reviews have been conducted thus far based on the sub-symptoms of BPSD. Given the  
25  
26 limitations in the choice of resources in real-world settings, reviews on BPSD based on sub-  
27  
28 symptoms are urgently needed. This umbrella review will provide a substantial update on  
29  
30 previous overviews of BPSD.<sup>14-19</sup> Unlike previous reviews, this umbrella review will  
31  
32 synthesize the results according to the sub-symptoms of BPSD. Therefore, we believe that  
33  
34 our umbrella review will provide recommendations for readily applicable guidelines in  
35  
36 dementia care.  
37  
38  
39  
40  
41

## 42 43 **ETHICS AND DISSEMINATION**

44  
45 Ethical approval was not required for the umbrella review or protocol. The findings of  
46  
47 the umbrella review will be shared through publication in a peer-reviewed journal.  
48  
49

## 50 51 **AUTHORS' CONTRIBUTIONS**

52  
53 EC, JYL, and MJK led the conceptualization and design of this work. JYL registered  
54  
55 the protocol in PROSPERO. MJK organized a search strategy. All authors provided input  
56  
57 into the study design and search strategy, and edited the draft protocol. All authors read and  
58  
59 approved the final manuscript.  
60

## **ACKNOWLEDGEMENT**

1  
2  
3  
4 We are grateful to Na Won Kim of Yonsei University Medical Library for her  
5 helpful comments on search strategy.  
6  
7  
8

9  
10 **FUNDING STATEMENT**

11 This work was supported by Basic Science Research Program through the National  
12 Research Foundation of Korea (NRF) funded by the Ministry of Education (grant numbers  
13 NRF-2020R1A6A1A03041989).  
14  
15  
16

17  
18 **COMPETING INTEREST**

19 The authors have no conflict of interest to declare.  
20  
21  
22

23  
24 **PATIENT AND PUBLIC INVOLVEMENT**

25 This umbrella review analyzes existing systematic research, which has no patients or  
26 members of the public.  
27  
28  
29  
30  
31  
32  
33  
34  
35  
36  
37  
38  
39  
40  
41  
42  
43  
44  
45  
46  
47  
48  
49  
50  
51  
52  
53  
54  
55  
56  
57  
58  
59  
60

**REFERENCE**

- 1 World Health Organization. Dementia. 2022. Available:<https://www.who.int/news-room/fact-sheets/detail/dementia> [Accessed 10 October 2022].
- 2 Alzheimer's Disease International. World Alzheimer Report 2021. 2021. Available:<https://www.alzint.org/resource/world-alzheimer-report-2021/> [Accessed Oct 10 2022].
- 3 Walaszek A. *Behavioral and psychological symptoms of dementia*. American Psychiatric Association, 2020.
- 4 Kaufer DI, Cummings JL, Ketchel P, *et al*. Validation of the NPI-Q, a brief clinical form of the Neuropsychiatric Inventory. *J Neuropsychiatry Clin Neurosci* 2000;12:233-9.
- 5 Gerlach LB, Kales HC. Managing behavioral and psychological symptoms of dementia. *Psychiatr Clin North Am* 2018;41:127-39.
- 6 Toot S, Swinson T, Devine M, *et al*. Causes of nursing home placement for older people with dementia: A systematic review and meta-analysis. *Int Psychogeriatr* 2017;29:195-208.
- 7 Connors MH, Seeher K, Teixeira-Pinto A, *et al*. Dementia and caregiver burden: A three-year longitudinal study. *Int J Geriatr Psychiatry* 2020;35:250-8.
- 8 Bränsvik V, Granvik E, Minthon L, *et al*. Mortality in patients with behavioural and psychological symptoms of dementia: A registry-based study. *Aging Ment Health* 2021;25:1101-9.
- 9 Alzheimer's Society. Optimising treatment and care for people with behavioural and psychological symptoms of dementia: A best practice guide for health and social care professionals. 2017. Available:<https://www.alzheimers.org.uk/sites/default/files/2018->

- 08/Optimising%20treatment%20and%20care%20-%20best%20practice%20guide.pdf?downloadID=609 [Accessed 10 October 2022].
- 10 National Institute for Health and Care Excellence. Dementia: Assessment, management and support for people living with dementia and their carers. 2018. Available: <https://www.nice.org.uk/guidance/ng97/chapter/Recommendations#managing-non-cognitive-symptoms> [Accessed 15 October 2022].
- 11 Douglas S, James I, Ballard C. Non-pharmacological interventions in dementia. *Adv Psychiatr Treat* 2004;10:171-7.
- 12 Growdon ME, Gan S, Yaffe K, *et al.* Polypharmacy among older adults with dementia compared with those without dementia in the United States. *J Am Geriatr Soc* 2021;69:2464-75.
- 13 Rodrigues MC, Oliveira C. Drug-drug interactions and adverse drug reactions in polypharmacy among older adults: An integrative review. *Rev Lat Am Enfermagem* 2016;24:e2800.
- 14 Demurtas J, Schoene D, Torbahn G, *et al.* Physical activity and exercise in mild cognitive impairment and dementia: An umbrella review of intervention and observational studies. *J Am Med Dir Assoc* 2020;21:1415-22.e6.
- 15 Dyer SM, Harrison SL, Laver K, *et al.* An overview of systematic reviews of pharmacological and non-pharmacological interventions for the treatment of behavioral and psychological symptoms of dementia. *Int Psychogeriatr* 2018;30:295-309.
- 16 Koch J, Amos JG, Beattie E, *et al.* Non-pharmacological interventions for neuropsychiatric symptoms of dementia in residential aged care settings: An umbrella review. *Int J Nurs Stud* 2022;128:104187.

- 1  
2  
3  
4 17 Legere LE, McNeill S, Schindel Martin L, *et al.* Nonpharmacological approaches for  
5 behavioural and psychological symptoms of dementia in older adults: A systematic  
6 review of reviews. *J Clin Nurs* 2018;27:e1360-e76.  
7  
8  
9  
10  
11 18 Abraha I, Rimland JM, Trotta FM, *et al.* Systematic review of systematic reviews of  
12 non-pharmacological interventions to treat behavioural disturbances in older patients  
13 with dementia. The SENATOR-OnTop series. *BMJ Open* 2017;7:e012759.  
14  
15  
16  
17  
18 19 Kishita N, Backhouse T, Mioshi E. Nonpharmacological Interventions to Improve  
19 depression, anxiety, and quality of life (QoL) in people with dementia: An overview  
20 of systematic reviews. *J Geriatr Psychiatry Neurol* 2020;33:28-41.  
21  
22  
23  
24  
25 20 James IA, Gray K, Moniz-Cook E, *et al.* Behavioural and psychological symptoms of  
26 dementia: A new framework for holistic understanding and non-pharmacological  
27 management. *BJPsych Advances* 2022;28:11-20.  
28  
29  
30  
31  
32 21 Kolanowski A, Boltz M, Galik E, *et al.* Determinants of behavioral and psychological  
33 symptoms of dementia: A scoping review of the evidence. *Nurs Outlook* 2017;65:515-  
34 29.  
35  
36  
37  
38  
39 22 Pollock M, Fernandes R, Becker L, *et al.* Chapter V: Overviews of Reviews. In:  
40 Higgins JPT, Thomas J, Chandler J, Cumpston M, Li T, Page MJ, Welch VA  
41 (editors). *Cochrane Handbook for Systematic Reviews of Interventions* version 6.3  
42 (updated February 2022). Cochrane, 2022.  
43  
44  
45  
46  
47  
48 23 Smith V, Devane D, Begley CM, *et al.* Methodology in conducting a systematic  
49 review of systematic reviews of healthcare interventions. *BMC Med Res Methodol*  
50 2011;11:15.  
51  
52  
53  
54  
55 24 Shea BJ, Reeves BC, Wells G, *et al.* AMSTAR 2: A critical appraisal tool for  
56 systematic reviews that include randomised or non-randomised studies of healthcare  
57 interventions, or both. *BMJ* 2017;358:j4008.  
58  
59  
60



- 1  
2  
3  
4 25 Pieper D, Antoine SL, Mathes T, *et al.* Systematic review finds overlapping reviews  
5 were not mentioned in every other overview. *J Clin Epidemiol* 2014;67:368-75.  
6  
7  
8  
9 26 Pollock M, Fernandes RM, Newton AS, *et al.* A decision tool to help researchers  
10 make decisions about including systematic reviews in overviews of reviews of  
11 healthcare interventions. *Syst Rev* 2019;8:29.  
12  
13  
14  
15  
16  
17  
18  
19  
20  
21  
22  
23  
24  
25  
26  
27  
28  
29  
30  
31  
32  
33  
34  
35  
36  
37  
38  
39  
40  
41  
42  
43  
44  
45  
46  
47  
48  
49  
50  
51  
52  
53  
54  
55  
56  
57  
58  
59  
60

For peer review only

**Table 1.** Inclusion and Exclusion Criteria

|              | Inclusion                                                                                                                                                                                                                         | Exclusion                                                                                                                                                                                                                                                                                                                                                                                                                                     |
|--------------|-----------------------------------------------------------------------------------------------------------------------------------------------------------------------------------------------------------------------------------|-----------------------------------------------------------------------------------------------------------------------------------------------------------------------------------------------------------------------------------------------------------------------------------------------------------------------------------------------------------------------------------------------------------------------------------------------|
| Population   | <ul style="list-style-type: none"> <li>Systematic reviews or meta-analyses that include persons living with dementia</li> </ul>                                                                                                   | <ul style="list-style-type: none"> <li>Systematic reviews or meta-analyses that do not include persons living with dementia</li> <li>Systematic reviews or meta-analyses in which target groups other than dementia are mixed (e.g., cognitively normal and mild cognitive impairment groups)</li> </ul>                                                                                                                                      |
| Intervention | <ul style="list-style-type: none"> <li>Systematic reviews or meta-analyses that include at least one non-pharmacological intervention</li> </ul>                                                                                  | <ul style="list-style-type: none"> <li>Systematic reviews or meta-analyses that include pharmacological interventions (e.g., drugs), a therapeutic intervention that needs a prescription (e.g., brain stimulation), or supplements (e.g., herbal medicine, cannabinoids)</li> <li>Systematic reviews or meta-analyses that include interventions for informal/formal caregivers or staff (e.g., dyadic, educational intervention)</li> </ul> |
| Control      | <ul style="list-style-type: none"> <li>Systematic reviews or meta-analyses that include usual care, waitlist control, or other types of non-pharmacological interventions</li> </ul>                                              | <ul style="list-style-type: none"> <li>Systematic reviews or meta-analyses that include a control group receiving pharmacological interventions</li> </ul>                                                                                                                                                                                                                                                                                    |
| Outcome      | <ul style="list-style-type: none"> <li>Systematic reviews or meta-analyses that include one or more BPSD symptoms (e.g., agitation) measured using valid measurement tools (e.g., Cohen-Mansfield Agitation Inventory)</li> </ul> | <ul style="list-style-type: none"> <li>Systematic reviews or meta-analyses that do not include BPSD outcomes</li> </ul>                                                                                                                                                                                                                                                                                                                       |
| Setting      | <ul style="list-style-type: none"> <li>Systematic reviews or meta-analyses that mostly include long-term care settings or community settings</li> </ul>                                                                           | <ul style="list-style-type: none"> <li>Systematic reviews or meta-analyses that only include acute or sub-acute settings</li> </ul>                                                                                                                                                                                                                                                                                                           |
| Design       | <ul style="list-style-type: none"> <li>Systematic review and meta-analyses that include randomized controlled trials as a primary study</li> </ul>                                                                                | <ul style="list-style-type: none"> <li>Original articles, qualitative reviews, narrative reviews, reviews of reviews, and non-peer-reviewed articles (e.g., editorials, clinical guidelines, and conference abstracts)</li> </ul>                                                                                                                                                                                                             |

*Note.* BPSD = Behavioral and Psychological Symptoms of Dementia.

## SUPPLEMENTARY MATERIAL

Table A1. Search Trail for PubMed

| Search # | MeSH Terms and Key Words                                                                                                                                                                                                                                                                                                                                                                                                                                                                                                                                                                                                                                                                                                                                                                                                                                                                                                                                                                                                                                                                                                                                                                                                                                                                                                                                                                                                                                                                                                                                                                                                                                                                                                                                                                                                                                                                                                                                                                                                                                                                                                                                                                                                                                                                                                                                                                                                                                                                                                                                                                                                                                                                                                                                                               |
|----------|----------------------------------------------------------------------------------------------------------------------------------------------------------------------------------------------------------------------------------------------------------------------------------------------------------------------------------------------------------------------------------------------------------------------------------------------------------------------------------------------------------------------------------------------------------------------------------------------------------------------------------------------------------------------------------------------------------------------------------------------------------------------------------------------------------------------------------------------------------------------------------------------------------------------------------------------------------------------------------------------------------------------------------------------------------------------------------------------------------------------------------------------------------------------------------------------------------------------------------------------------------------------------------------------------------------------------------------------------------------------------------------------------------------------------------------------------------------------------------------------------------------------------------------------------------------------------------------------------------------------------------------------------------------------------------------------------------------------------------------------------------------------------------------------------------------------------------------------------------------------------------------------------------------------------------------------------------------------------------------------------------------------------------------------------------------------------------------------------------------------------------------------------------------------------------------------------------------------------------------------------------------------------------------------------------------------------------------------------------------------------------------------------------------------------------------------------------------------------------------------------------------------------------------------------------------------------------------------------------------------------------------------------------------------------------------------------------------------------------------------------------------------------------------|
| #1       | "Aged"[MeSH Terms] OR "older adult"[All Fields] OR "older adults"[All Fields] OR "senior"[All Fields] OR "seniors"[All Fields] OR "Elderly"[All Fields] OR "elder"[All Fields] OR "Aged"[All Fields] OR "older people"[All Fields] OR "old person"[All Fields] OR "older patient"[All Fields] OR "older patients"[All Fields] OR "old age"[All Fields] OR "aging adult"[All Fields] OR "aging adults"[All Fields] OR "ageing adult"[All Fields] OR "ageing adults"[All Fields]                                                                                                                                                                                                                                                                                                                                                                                                                                                                                                                                                                                                                                                                                                                                                                                                                                                                                                                                                                                                                                                                                                                                                                                                                                                                                                                                                                                                                                                                                                                                                                                                                                                                                                                                                                                                                                                                                                                                                                                                                                                                                                                                                                                                                                                                                                         |
| #2       | "dementia"[MeSH Terms] OR "Lewy Body Disease"[MeSH Terms] OR "dementia"[All Fields] OR "Alzheimer Disease"[All Fields] OR "Alzheimer"[All Fields] OR "Alzheimer's"[All Fields] OR "Lewy"[All Fields] OR "Vascular dementia"[All Fields] OR "alcohol related dementia"[All Fields] OR "Parkinson's disease dementia"[All Fields] OR "Lewy Body Disease"[All Fields]                                                                                                                                                                                                                                                                                                                                                                                                                                                                                                                                                                                                                                                                                                                                                                                                                                                                                                                                                                                                                                                                                                                                                                                                                                                                                                                                                                                                                                                                                                                                                                                                                                                                                                                                                                                                                                                                                                                                                                                                                                                                                                                                                                                                                                                                                                                                                                                                                     |
| #3       | "Behavioral Disciplines and Activities"[MeSH Terms] OR "Behavior Therapy"[MeSH Terms] OR "Psychotherapy"[MeSH Terms] OR "Reality Therapy"[MeSH Terms] OR "Exercise"[MeSH Terms] OR "Massage"[MeSH Terms] OR "Aromatherapy"[MeSH Terms] OR "Animal Assisted Therapy"[MeSH Terms] OR "Horticultural Therapy"[MeSH Terms] OR "Art Therapy"[MeSH Terms] OR "Music Therapy"[MeSH Terms] OR "Occupational Therapy"[MeSH Terms] OR "Play Therapy"[MeSH Terms] OR "Recreation Therapy"[MeSH Terms] OR "Transcutaneous Electric Nerve Stimulation"[MeSH Terms] OR "meditation"[MeSH Terms] OR "mindfulness"[MeSH Terms] OR "Behavioral Disciplines and Activities"[All Fields] OR "Non pharmacological"[All Fields] OR "non drug"[All Fields] OR "behavioral"[All Fields] OR "Behavior Therapy"[All Fields] OR "psychosocial"[All Fields] OR "Psychodynamic therapy"[All Fields] OR "Psychotherapy"[All Fields] OR "Psychological treatment"[All Fields] OR "Cognitive Stimulation Therapy"[All Fields] OR "Cognitive Therapy"[All Fields] OR "cognitive training"[All Fields] OR "cognitive rehabilitation"[All Fields] OR "Reality Orientation"[All Fields] OR "Reminiscence"[All Fields] OR "Reminiscences"[All Fields] OR "autobiography"[All Fields] OR "life review"[All Fields] OR "storytelling"[All Fields] OR "oral history"[All Fields] OR "life history"[All Fields] OR "validation therapy"[All Fields] OR "Reality Therapy"[All Fields] OR "dementia care mapping"[All Fields] OR "Montessori based activities"[All Fields] OR "ability focused"[All Fields] OR "Exercise"[All Fields] OR "Physical"[All Fields] OR "muscle relaxation"[All Fields] OR "touch"[All Fields] OR "touch therapy"[All Fields] OR "Massage"[All Fields] OR "Multi component therapy"[All Fields] OR "Aromatherapy"[All Fields] OR "Animal Assisted Therapy"[All Fields] OR "doll therapy"[All Fields] OR "robot therapy"[All Fields] OR "pet robot"[All Fields] OR "Horticultural Therapy"[All Fields] OR "Art Therapy"[All Fields] OR "painting"[All Fields] OR "Spaced retrieval"[All Fields] OR "Music Therapy"[All Fields] OR "light therapy"[All Fields] OR "Occupational Therapy"[All Fields] OR "Play Therapy"[All Fields] OR "Recreation Therapy"[All Fields] OR "snoezelen"[All Fields] OR "multimodality therapy"[All Fields] OR "sensory"[All Fields] OR "sensory stimulation"[All Fields] OR "Transcutaneous Electric Nerve Stimulation"[All Fields] OR "TENS"[All Fields] OR "emotion oriented"[All Fields] OR "therapeutic conversation"[All Fields] OR "meditation"[All Fields] OR "mindfulness"[All Fields] OR "Special care"[All Fields] OR "Simulated presence therapy"[All Fields] OR "multisensorial"[All Fields] OR "multisensory"[All Fields] OR "brain stimulation"[All Fields] |
| #4       | "Behavioral Symptoms"[MeSH Terms] OR "Problem Behavior"[MeSH Terms] OR "Psychomotor Agitation"[MeSH Terms] OR "Irritable Mood"[MeSH Terms] OR                                                                                                                                                                                                                                                                                                                                                                                                                                                                                                                                                                                                                                                                                                                                                                                                                                                                                                                                                                                                                                                                                                                                                                                                                                                                                                                                                                                                                                                                                                                                                                                                                                                                                                                                                                                                                                                                                                                                                                                                                                                                                                                                                                                                                                                                                                                                                                                                                                                                                                                                                                                                                                          |

"aggression"[MeSH Terms] OR "depressive disorder"[MeSH Terms] OR "depression"[MeSH Terms] OR "anxiety"[MeSH Terms] OR "delusions"[MeSH Terms] OR "hallucinations"[MeSH Terms] OR "Sleep Deprivation"[MeSH Terms] OR "apathy"[MeSH Terms] OR "Euphoria"[MeSH Terms] OR "Appetite"[MeSH Terms] OR "Behavioral Symptoms"[All Fields] OR "neuropsychic symptoms"[All Fields] OR "behavior"[All Fields] OR "behaviors"[All Fields] OR "behavior"[All Fields] OR "behaviours"[All Fields] OR "behavioral psychological symptoms"[All Fields] OR "behavioral and psychological symptoms"[All Fields] OR "behavioural and psychological symptoms"[All Fields] OR "BPSD"[All Fields] OR "BSD"[All Fields] OR "behavioral problems"[All Fields] OR "Problem Behavior"[All Fields] OR "repetitive behavior"[All Fields] OR "repetitive"[All Fields] OR "agitation"[All Fields] OR "pacing"[All Fields] OR "wander"[All Fields] OR "wanders"[All Fields] OR "wandering"[All Fields] OR "walking"[All Fields] OR "safe walking"[All Fields] OR "sundowning"[All Fields] OR "Night time behavior"[All Fields] OR "challenging behavior"[All Fields] OR "disruptive"[All Fields] OR "restless"[All Fields] OR "Psychomotor Agitation"[All Fields] OR "Irritability"[All Fields] OR "Irritable Mood"[All Fields] OR "Disinhibition"[All Fields] OR "aggression"[All Fields] OR "aggressive"[All Fields] OR "aberrant"[All Fields] OR "aberrant motor behavior"[All Fields] OR "social inappropriateness"[All Fields] OR "vocalization"[All Fields] OR "vocalisation"[All Fields] OR "psychomotor activity"[All Fields] OR "psychosis"[All Fields] OR "Psychotic Disorders"[All Fields] OR "psycho"[All Fields] OR "psycho social"[All Fields] OR "neuropsychiatric symptom"[All Fields] OR "depression"[All Fields] OR "depressive"[All Fields] OR "depressive disorder"[All Fields] OR "mood disturbance"[All Fields] OR "anxiety"[All Fields] OR "delusions"[All Fields] OR "depressive disorder"[All Fields] OR "hallucination"[All Fields] OR "Sleep disturbance"[All Fields] OR "Sleep disorders"[All Fields] OR "Sleeping disorders"[All Fields] OR "Sleep Deprivation"[All Fields] OR "apathy"[All Fields] OR "Indifference"[All Fields] OR "dysphoria"[All Fields] OR "Euphoria"[All Fields] OR "Elation"[All Fields] OR "Appetite"[All Fields] OR "Eating change"[All Fields] OR "personality change"[All Fields] OR "behavioural"[All Fields] OR "neuropsychiatric"[All Fields]—

#5 "Systematic Review"[Publication Type] OR "meta-analysis"[Publication Type] OR "Systematic Review"[All Fields] OR "meta-analysis"[All Fields] OR "Systematic Review"[Title/Abstract] OR "meta-analysis"[Title/Abstract]

#6 #1 AND #2 AND #3 AND #4 AND #5

#7 #6 AND Applied limits (publication year ≤ 10 years)

**Table A2. Search Trail for CINAHL**

| Search # | Subject Headings (MH) and Key Words                                                                                                                                                                                                                                                                                                                                                                                                                                                                                                                                                                                                                                                                                                                                                                                                                                                                                                                                                                                                                                                                                                                                                                                                                                                                                                                                                                                                                                                                                                                                                                                                                                                                                                                                                                                                   |
|----------|---------------------------------------------------------------------------------------------------------------------------------------------------------------------------------------------------------------------------------------------------------------------------------------------------------------------------------------------------------------------------------------------------------------------------------------------------------------------------------------------------------------------------------------------------------------------------------------------------------------------------------------------------------------------------------------------------------------------------------------------------------------------------------------------------------------------------------------------------------------------------------------------------------------------------------------------------------------------------------------------------------------------------------------------------------------------------------------------------------------------------------------------------------------------------------------------------------------------------------------------------------------------------------------------------------------------------------------------------------------------------------------------------------------------------------------------------------------------------------------------------------------------------------------------------------------------------------------------------------------------------------------------------------------------------------------------------------------------------------------------------------------------------------------------------------------------------------------|
| #1       | (MH "Aged") OR "older adults" OR "seniors" OR "Elderly" OR "elder" OR "Aged" OR "older adult" OR "senior" OR "older people" OR "old person" OR "older patient" OR "older patients" OR "old age" OR "aging adult" OR "aging adults" OR "ageing adult" OR "ageing adults"                                                                                                                                                                                                                                                                                                                                                                                                                                                                                                                                                                                                                                                                                                                                                                                                                                                                                                                                                                                                                                                                                                                                                                                                                                                                                                                                                                                                                                                                                                                                                               |
| #2       | (MH "Dementia") OR (MH "Alzheimer's Disease") OR (MH "Lewy Body Disease") OR "dementia" OR "Alzheimer Disease" OR "Alzheimer" OR "Alzheimer's" OR "Lewy" OR "Vascular dementia" OR "alcohol related dementia" OR "Parkinson's disease dementia" OR "Lewy Body Disease"                                                                                                                                                                                                                                                                                                                                                                                                                                                                                                                                                                                                                                                                                                                                                                                                                                                                                                                                                                                                                                                                                                                                                                                                                                                                                                                                                                                                                                                                                                                                                                |
| #3       | (MH "Cognitive Therapy") OR (MH "Behavior Therapy") OR (MH "Psychotherapy") OR (MH "Reality Therapy") OR (MH "Exercise") OR (MH "Massage") OR (MH "Aromatherapy") OR (MH "Animal Assisted Therapy") OR (MH "Art Therapy") OR (MH "Music Therapy") OR (MH "Occupational Therapy") OR (MH "Play Therapy") OR (MH "Recreational Therapy") OR (MH "Transcutaneous Electric Nerve Stimulation") OR (MH "meditation") OR (MH "mindfulness") OR "Behavioral Disciplines and Activities" OR "Non pharmacological" OR "non drug" OR "behavioral" OR "Behavior Therapy" OR "psychosocial" OR "Psychodynamic therapy" OR "Psychotherapy" OR "Psychological treatment" OR "Cognitive Stimulation Therapy" OR "Cognitive Therapy" OR "cognitive training" OR "cognitive rehabilitation" OR "Reality Orientation" OR "Reminiscence" OR "Reminiscences" OR "autobiography" OR "life review" OR "storytelling" OR "oral history" OR "life history" OR "validation therapy" OR "Reality Therapy" OR "dementia care mapping" OR "Montessori based activities" OR "ability focused" OR "Exercise" OR "Physical" OR "muscle relaxation" OR "touch" OR "touch therapy" OR "Massage" OR "Multi component therapy" OR "Aromatherapy" OR "Animal Assisted Therapy" OR "doll therapy" OR "robot therapy" OR "Horticultural Therapy" OR "Art Therapy" OR "painting" OR "Spaced retrieval" OR "Music Therapy" OR "light therapy" OR "Occupational Therapy" OR "Play Therapy" OR "Recreation Therapy" OR "snoezelen" OR "multimodality therapy" OR "sensory" OR "sensory stimulation" OR "Transcutaneous Electric Nerve Stimulation" OR "TENS" OR "emotion oriented" OR "therapeutic conversation" OR "meditation" OR "mindfulness" OR "Special care" OR "pet robot" OR "Simulated presence therapy" OR "multisensorial" OR "multisensory" OR "brain stimulation" |
| #4       | (MH "Behavioral Symptoms") OR (MH "aggression") OR (MH "Psychotic Disorders") OR (MH "depression") OR (MH "delusions") OR (MH "anxiety") OR (MH "hallucinations") OR (MH "Sleep Deprivation") OR (MH "apathy") OR (MH "Appetite") OR "Behavioral Symptoms" OR "neuropsychic symptoms" OR "behavior" OR "behaviors" OR "behaviour" OR "behaviours" OR "behavioral psychological symptoms" OR "behavioral and psychological symptoms" OR "behavioural and psychological symptoms" OR "BPSD" OR "BSD" OR "behavioral problems" OR "Problem Behavior" OR "repetitive behavior" OR "repetitive" OR "agitation" OR "pacing" OR "wander" OR "wanders" OR "wandering" OR "walking" OR "safe walking" OR "sundowning" OR "Night time behavior" OR "challenging behavior" OR "disruptive" OR "restless" OR "Psychomotor Agitation" OR "Irritability" OR "Irritable Mood" OR "Disinhibition" OR "aggression" OR "aggressive" OR "aberrant" OR "aberrant motor behavior" OR "social inappropriateness" OR "vocalization" OR "vocalisation" OR "psychomotor activity" OR "psychosis" OR "Psychotic Disorders" OR "psycho" OR "psycho social" OR "neuropsychiatric symptom" OR "depression" OR "depressive" OR "depressive disorder" OR "mood disturbance" OR "anxiety" OR "delusions" OR "depressive disorder" OR "hallucination" OR "Sleep disturbance" OR "Sleep disorders" OR "Sleeping disorders" OR "Sleep Deprivation" OR "apathy" OR "Indifference" OR "dysphoria" OR "Euphoria" OR "Elation" OR "Appetite" OR                                                                                                                                                                                                                                                                                                                              |

|    |                                                                                                                                                                                            |
|----|--------------------------------------------------------------------------------------------------------------------------------------------------------------------------------------------|
|    | "Eating change" OR "personality change" OR "behavioural" OR "neuropsychiatric" OR "mood"                                                                                                   |
| #5 | (MH "Systematic Review") OR (MH "Meta Analysis") OR TI "systematic review" OR AB "systematic review" OR TI "meta-analysis" OR AB "meta-analysis" OR "systematic review" OR "meta-analysis" |
| #6 | S1 AND S2 AND S3 AND S4 AND S5                                                                                                                                                             |
| #7 | S6 AND [Applied filters] Published Date: 2012-2022                                                                                                                                         |

For peer review only

**Table A3. Search Trail for PsycINFO**

| Search # | Main Subjects and Key Words                                                                                                                                                                                                                                                                                                                                                                                                                                                                                                                                                                                                                                                                                                                                                                                                                                                                                                                                                                                                                                                                                                                                                                                                                                                                                                                                                                                                                                                                                                                                                                                                                                                                                                                                                                                                                                                                                                                                                                                                                                                                                                   |
|----------|-------------------------------------------------------------------------------------------------------------------------------------------------------------------------------------------------------------------------------------------------------------------------------------------------------------------------------------------------------------------------------------------------------------------------------------------------------------------------------------------------------------------------------------------------------------------------------------------------------------------------------------------------------------------------------------------------------------------------------------------------------------------------------------------------------------------------------------------------------------------------------------------------------------------------------------------------------------------------------------------------------------------------------------------------------------------------------------------------------------------------------------------------------------------------------------------------------------------------------------------------------------------------------------------------------------------------------------------------------------------------------------------------------------------------------------------------------------------------------------------------------------------------------------------------------------------------------------------------------------------------------------------------------------------------------------------------------------------------------------------------------------------------------------------------------------------------------------------------------------------------------------------------------------------------------------------------------------------------------------------------------------------------------------------------------------------------------------------------------------------------------|
| #1       | MAINSUBJECT.EXACT("Aged") OR "older adults" OR "seniors" OR "Elderly" OR "elder" OR "Aged" OR "older adult" OR "senior" OR "older people" OR "old person" OR "older patient" OR "older patients" OR "old age" OR "aging adult" OR "aging adults" OR "ageing adult" OR "ageing adults"                                                                                                                                                                                                                                                                                                                                                                                                                                                                                                                                                                                                                                                                                                                                                                                                                                                                                                                                                                                                                                                                                                                                                                                                                                                                                                                                                                                                                                                                                                                                                                                                                                                                                                                                                                                                                                         |
| #2       | MAINSUBJECT.EXACT("DEMENTIA") OR MAINSUBJECT.EXACT("Alzheimer's Disease") OR MAINSUBJECT.EXACT("Lewy Body Disease") OR "dementia" OR "Alzheimer's Disease" OR "Alzheimer's" OR "Alzheimer" OR "Vascular dementia" OR "alcohol related dementia" OR "Parkinson's disease dementia" OR "Lewy" OR "Lewy Body Disease"                                                                                                                                                                                                                                                                                                                                                                                                                                                                                                                                                                                                                                                                                                                                                                                                                                                                                                                                                                                                                                                                                                                                                                                                                                                                                                                                                                                                                                                                                                                                                                                                                                                                                                                                                                                                            |
| #3       | MAINSUBJECT.EXACT("Cognitive Therapy") OR MAINSUBJECT.EXACT("Behavior Therapy") OR MAINSUBJECT.EXACT("Psychotherapy") OR MAINSUBJECT.EXACT("Reality Therapy") OR MAINSUBJECT.EXACT("Exercise") OR MAINSUBJECT.EXACT("Massage") OR MAINSUBJECT.EXACT("Aromatherapy") OR MAINSUBJECT.EXACT("Animal Assisted Therapy") OR MAINSUBJECT.EXACT("Horticultural Therapy") OR MAINSUBJECT.EXACT("Art Therapy") OR MAINSUBJECT.EXACT("Music Therapy") OR MAINSUBJECT.EXACT("Occupational Therapy") OR MAINSUBJECT.EXACT("Play Therapy") OR MAINSUBJECT.EXACT("Recreational Therapy") OR MAINSUBJECT.EXACT("Transcutaneous Electric Nerve Stimulation") OR MAINSUBJECT.EXACT("meditation") OR MAINSUBJECT.EXACT("mindfulness") OR "behavioral Disciplines and Activities" OR "Non pharmacological" OR "non drug" OR "behavioral" OR "Behavior Therapy" OR "psychosocial" OR "Psychodynamic therapy" OR "Psychotherapy" OR "Psychological treatment" OR "Cognitive Stimulation Therapy" OR "Cognitive Therapy" OR "cognitive training" OR "cognitive rehabilitation" OR "Reality Orientation" OR "Reminiscence" OR "Reminiscences" OR "RT" OR "autobiography" OR "life review" OR "storytelling" OR "oval history" OR "life history" OR "validation therapy" OR "Reality Therapy" OR "dementia care mapping" OR "Montessori based activities" OR "ability focused" OR "Exercise" OR "Physical" OR "muscle relaxation" OR "touch" OR "touch therapy" OR "Massage" OR "Multi component therapy" OR "Aromatherapy" OR "Animal Assisted Therapy" OR "doll therapy" OR "robot therapy" OR "Horticultural Therapy" OR "Art Therapy" OR "painting" OR "Spaced retrieval" OR "Music Therapy" OR "light therapy" OR "Occupational Therapy" OR "Play Therapy" OR "Recreation Therapy" OR "snoezelen" OR "multimodality therapy" OR "sensory" OR "sensory stimulation" OR "Transcutaneous Electric Nerve Stimulation" OR "TENS" OR "emotion oriented" OR "therapeutic conversation" OR "meditation" OR "mindfulness" OR "Special care" OR "pet robot" OR " Simulated presence therapy" OR "multisensorial" OR " multisensory" OR "brain stimulation" |
| #4       | MAINSUBJECT.EXACT("behavioral Symptoms") OR MAINSUBJECT.EXACT("apathy") OR MAINSUBJECT.EXACT("Sleep Deprivation") OR MAINSUBJECT.EXACT("aggression") OR MAINSUBJECT.EXACT("Psychomotor Agitation") OR MAINSUBJECT.EXACT("depression") OR MAINSUBJECT.EXACT("delusions") OR MAINSUBJECT.EXACT("anxiety") OR MAINSUBJECT.EXACT("hallucinations") OR MAINSUBJECT.EXACT("Appetite") OR MAINSUBJECT.EXACT("Psychotic Disorders") OR "behavioral Symptoms" OR "neuropsychic symptoms" OR "behavior" OR "behaviors" OR "behavior" OR "behaviours" OR "behavioral psychological symptoms" OR "behavioral and                                                                                                                                                                                                                                                                                                                                                                                                                                                                                                                                                                                                                                                                                                                                                                                                                                                                                                                                                                                                                                                                                                                                                                                                                                                                                                                                                                                                                                                                                                                          |

psychological symptoms" OR "behavioural and psychological symptoms" OR "BPSD" OR "BSD" OR "behavioral problems" OR "Problem Behavior" OR "repetitive behavior" OR "repetitive" OR "agitation" OR "pacing" OR "wander" OR "wanders" OR "wandering" OR "walking" OR "safe walking" OR "sundowning" OR "Night time behavior" OR "challenging behavior" OR "disruptive" OR "restless" OR "Psychomotor Agitation" OR "Irritability" OR "Irritable Mood" OR "Disinhibition" OR "aggression" OR "aggressive" OR "aberrant" OR "aberrant motor behavior" OR "social inappropriateness" OR "vocalization" OR "vocalization" OR "psychomotor activity" OR "psychosis" OR "Psychotic Disorders" OR "psycho" OR "psycho social" OR "neuropsychiatric symptom" OR "depression" OR "depressive" OR "depressive disorder" OR "mood disturbance" OR "anxiety" OR "delusions" OR "depressive disorder" OR "hallucination" OR "Sleep disturbance" OR "Sleep disorders" OR "Sleeping disorders" OR "Sleep Deprivation" OR "apathy" OR "Indifference" OR "dysphoria" OR "Euphoria" OR "Elation" OR "Appetite" OR "Eating change" OR "personality change" OR "behavioural" OR "neuropsychiatric" OR "mood"

#5 MAINSUBJECT.EXACT("systematic review") OR MAINSUBJECT.EXACT("meta analysis") OR tiab("systematic review") OR tiab("meta-analysis") OR "systematic review" OR "meta-analysis"

#6 S1 AND S2 AND S3 AND S4 AND S5

#7 S7 AND [Applied filters] Published Date: 2012-2022



**Table A4. Search Trail for Embase**

| Search # | MeSH Terms and Key Words                                                                                                                                                                                                                                                                                                                                                                                                                                                                                                                                                                                                                                                                                                                                                                                                                                                                                                                                                                                                                                                                                                                                                                                                                                                                                                                                                                                                                                                                                                                                                                                                                         |
|----------|--------------------------------------------------------------------------------------------------------------------------------------------------------------------------------------------------------------------------------------------------------------------------------------------------------------------------------------------------------------------------------------------------------------------------------------------------------------------------------------------------------------------------------------------------------------------------------------------------------------------------------------------------------------------------------------------------------------------------------------------------------------------------------------------------------------------------------------------------------------------------------------------------------------------------------------------------------------------------------------------------------------------------------------------------------------------------------------------------------------------------------------------------------------------------------------------------------------------------------------------------------------------------------------------------------------------------------------------------------------------------------------------------------------------------------------------------------------------------------------------------------------------------------------------------------------------------------------------------------------------------------------------------|
| #1       | 'aged'/exp OR 'older adults' OR senior OR seniors OR Elderly OR elder OR Aged OR 'older adult' OR 'older people' OR 'old person' OR 'older patient' OR 'older patients' OR 'old age' OR 'aging adult' OR 'aging adults' OR 'ageing adult' OR 'ageing adults'                                                                                                                                                                                                                                                                                                                                                                                                                                                                                                                                                                                                                                                                                                                                                                                                                                                                                                                                                                                                                                                                                                                                                                                                                                                                                                                                                                                     |
| #2       | 'dementia'/exp OR dementia OR 'Alzheimer disease' OR Alzheimer OR Alzheimers OR Lewy OR 'vascular dementia' OR 'alcohol related dementia' OR 'Parkinsons disease dementia' OR 'Lewy body disease'                                                                                                                                                                                                                                                                                                                                                                                                                                                                                                                                                                                                                                                                                                                                                                                                                                                                                                                                                                                                                                                                                                                                                                                                                                                                                                                                                                                                                                                |
| #3       | 'Psychotherapy'/exp OR 'Exercise'/exp OR 'Massage'/exp OR 'Aromatherapy'/exp OR 'Animal Assisted Therapy'/exp OR 'Horticultural Therapy'/exp OR 'Occupational Therapy'/exp OR 'recreational therapy'/exp OR 'Transcutaneous Electric Nerve Stimulation'/exp OR 'meditation'/exp OR 'Behavioral symptoms' OR Activities OR 'Non pharmacological' OR 'non drug' OR behavioral OR 'Behavior Therapy' OR psychosocial OR 'Psycho dynamic therapy' OR Psychotherapy OR 'Psychological treatment' OR 'Cognitive Stimulation Therapy' OR 'Cognitive Therapy' OR 'cognitive training' OR 'cognitive rehabilitation' OR 'Reality Orientation' OR Reminiscence OR Reminiscences OR RT OR autobiography OR 'life review' OR storytelling OR 'oral history' OR 'life history' OR 'validation therapy' OR 'Reality Therapy' OR 'Dementia Care Mapping' OR 'Montessori Based Activities' OR 'ability focused' OR Exercise OR Physical OR 'muscle relaxation' OR Touch OR 'touch therapy' OR Massage OR 'Multi component therapy' OR Aromatherapy OR 'Animal Assisted Therapy' OR 'doll therapy' OR 'robot therapy' OR 'Horticultural Therapy' OR 'Art Therapy' OR painting OR 'Spaced retrieval' OR 'Music Therapy' OR 'light therapy' OR 'Occupational Therapy' OR 'Play Therapy' OR 'recreational Therapy' OR snoezelen OR 'multimodality therapy' OR sensory OR 'sensory stimulation' OR 'Transcutaneous Electric Nerve Stimulation' OR TENS OR 'emotion oriented' OR 'therapeutic conversation' OR Meditation OR mindfulness OR 'Special care' OR 'pet robot' OR 'Simulated presence therapy' OR 'multisensorial' OR 'multisensory' OR 'brain stimulation' |
| #4       | 'behavior disorder'/exp OR 'irritability'/exp OR 'aggression'/exp OR 'depression'/exp OR 'anxiety'/exp OR 'delusion'/exp OR 'hallucination'/exp OR 'Sleep Deprivation'/exp OR 'apathy'/exp OR 'Euphoria'/exp OR 'Appetite'/exp OR 'behavior change'/exp OR 'restlessness'/exp OR 'Behavioral Symptoms' OR 'neuropsychic symptoms' OR behavior OR behaviors OR behavior OR behaviours OR 'behavioral psychological symptoms' OR 'behavioral and psychological symptoms' OR 'behavioural and psychological symptoms' OR BPSD OR BSD OR 'behavioral problems' OR 'Problem Behavior' OR 'repetitive behavior' OR repetitive OR agitation OR pacing OR wander OR wanders OR wandering OR walking OR 'safe walking' OR sundowning OR 'Night time behavior' OR 'challenging behavior' OR disruptive OR restless OR 'Psychomotor Agitation' OR Irritability OR 'Irritable Mood' OR Disinhibition OR aggression OR aggressive OR aberrant OR 'aberrant motor behavior' OR 'social inappropriateness' OR vocalization OR vocalisation OR 'psychomotor activity' OR psychosis OR 'Psychotic Disorders' OR psycho OR psycho social OR 'neuropsychiatric symptom' OR depression OR depressive OR 'depressive disorder' OR 'mood disturbance' OR anxiety OR delusions OR 'depressive disorder' OR hallucination OR 'Sleep disturbance' OR 'Sleep disorders' OR 'Sleeping disorders' OR 'Sleep Deprivation' OR apathy OR Indifference OR dysphoria OR Euphoria OR Elation OR Appetite OR 'Eating change' OR 'personality change' OR 'behavioural' OR 'neuropsychiatric'                                                                                         |

|    |                                                                                        |
|----|----------------------------------------------------------------------------------------|
| 1  |                                                                                        |
| 2  |                                                                                        |
| 3  |                                                                                        |
| 4  |                                                                                        |
| 5  | #5                                                                                     |
| 6  | 'systematic review'/exp OR 'meta analysis'/exp OR 'systematic review':ti OR 'meta      |
| 7  | analysis':ti OR 'systematic review':ab OR 'meta analysis':ab OR 'systematic review' OR |
| 8  | 'meta analysis'                                                                        |
| 9  | #6                                                                                     |
| 10 | #1 AND #2 AND #3 AND #4 AND #5                                                         |
| 11 | #7                                                                                     |
| 12 | #6 AND (2012:py OR 2013:py OR 2014:py OR 2015:py OR 2016:py OR 2017:py OR              |
| 13 | 2018:py OR 2019:py OR 2020:py OR 2021:py OR 2022:py)                                   |
| 14 |                                                                                        |
| 15 |                                                                                        |
| 16 |                                                                                        |
| 17 |                                                                                        |
| 18 |                                                                                        |
| 19 |                                                                                        |
| 20 |                                                                                        |
| 21 |                                                                                        |
| 22 |                                                                                        |
| 23 |                                                                                        |
| 24 |                                                                                        |
| 25 |                                                                                        |
| 26 |                                                                                        |
| 27 |                                                                                        |
| 28 |                                                                                        |
| 29 |                                                                                        |
| 30 |                                                                                        |
| 31 |                                                                                        |
| 32 |                                                                                        |
| 33 |                                                                                        |
| 34 |                                                                                        |
| 35 |                                                                                        |
| 36 |                                                                                        |
| 37 |                                                                                        |
| 38 |                                                                                        |
| 39 |                                                                                        |
| 40 |                                                                                        |
| 41 |                                                                                        |
| 42 |                                                                                        |
| 43 |                                                                                        |
| 44 |                                                                                        |
| 45 |                                                                                        |
| 46 |                                                                                        |
| 47 |                                                                                        |
| 48 |                                                                                        |
| 49 |                                                                                        |
| 50 |                                                                                        |
| 51 |                                                                                        |
| 52 |                                                                                        |
| 53 |                                                                                        |
| 54 |                                                                                        |
| 55 |                                                                                        |
| 56 |                                                                                        |
| 57 |                                                                                        |
| 58 |                                                                                        |
| 59 |                                                                                        |
| 60 |                                                                                        |

For peer review only

**Table A5. Search Trail for Cochrane**

| Search # | MeSH Terms and Key Words                                                                                                                                                                                                                                                                                                                                                                                                                                                                                                                                                                                                                                                                                                                                                                                                                                                                                                                                                                                                                                                                                                                                                                                                                                                                                                                                                                                                                                                                                                                                                                                                                                                                                                                                                                                                                                                                                                                                                                                                                                                                                                                                                                                                                                                                        |
|----------|-------------------------------------------------------------------------------------------------------------------------------------------------------------------------------------------------------------------------------------------------------------------------------------------------------------------------------------------------------------------------------------------------------------------------------------------------------------------------------------------------------------------------------------------------------------------------------------------------------------------------------------------------------------------------------------------------------------------------------------------------------------------------------------------------------------------------------------------------------------------------------------------------------------------------------------------------------------------------------------------------------------------------------------------------------------------------------------------------------------------------------------------------------------------------------------------------------------------------------------------------------------------------------------------------------------------------------------------------------------------------------------------------------------------------------------------------------------------------------------------------------------------------------------------------------------------------------------------------------------------------------------------------------------------------------------------------------------------------------------------------------------------------------------------------------------------------------------------------------------------------------------------------------------------------------------------------------------------------------------------------------------------------------------------------------------------------------------------------------------------------------------------------------------------------------------------------------------------------------------------------------------------------------------------------|
| #1       | MeSH descriptor: [Aged] explode all trees OR older adults OR seniors OR Elderly OR elder OR Aged OR older people OR old person OR older patient OR older patients OR old age OR aging adult OR aging adults OR ageing adult OR ageing adults                                                                                                                                                                                                                                                                                                                                                                                                                                                                                                                                                                                                                                                                                                                                                                                                                                                                                                                                                                                                                                                                                                                                                                                                                                                                                                                                                                                                                                                                                                                                                                                                                                                                                                                                                                                                                                                                                                                                                                                                                                                    |
| #2       | MeSH descriptor: [Dementia] explode all trees OR MeSH descriptor: [Lewy Body Disease] explode all trees OR dementia OR Alzheimer Disease OR Alzheimer OR Alzheimer's OR Lewy OR Vascular dementia OR alcohol related dementia OR Parkinson's disease dementia OR Lewy Body Disease                                                                                                                                                                                                                                                                                                                                                                                                                                                                                                                                                                                                                                                                                                                                                                                                                                                                                                                                                                                                                                                                                                                                                                                                                                                                                                                                                                                                                                                                                                                                                                                                                                                                                                                                                                                                                                                                                                                                                                                                              |
| #3       | MeSH descriptor: [Behavioral Disciplines and Activities] explode all trees OR MeSH descriptor: [Behavior Therapy] explode all trees OR MeSH descriptor: [Psychotherapy] explode all trees OR MeSH descriptor: [Reality Therapy] explode all trees OR MeSH descriptor: [Exercise] explode all trees OR MeSH descriptor: [Massage] explode all trees OR MeSH descriptor: [Aromatherapy] explode all trees OR MeSH descriptor: [Animal Assisted Therapy] explode all trees OR MeSH descriptor: [Horticultural Therapy] explode all trees OR MeSH descriptor: [Art Therapy] explode all trees OR MeSH descriptor: [Music Therapy] explode all trees OR MeSH descriptor: [Occupational Therapy] explode all trees OR MeSH descriptor: [Play Therapy] explode all trees OR MeSH descriptor: [Recreation Therapy] explode all trees OR MeSH descriptor: [Transcutaneous Electric Nerve Stimulation] explode all trees OR MeSH descriptor: [Meditation] explode all trees OR MeSH descriptor: [Mindfulness] explode all trees OR Behavioral Disciplines and Activities OR Non pharmacological OR non drug OR behavioral OR Behavior Therapy OR psychosocial OR Psychodynamic therapy OR Psychotherapy OR Psychological treatment OR Cognitive Stimulation Therapy OR Cognitive Therapy OR cognitive training OR cognitive rehabilitation OR Reality Orientation OR Reminiscence OR Reminiscences OR RT OR autobiography OR life review OR storytelling OR oral history OR life history OR validation therapy OR Reality Therapy OR dementia care mapping OR Montessori based activities OR ability focused OR Exercise OR Physical OR muscle relaxation OR Touch OR touch therapy OR Massage OR Multi component therapy OR Aromatherapy OR Animal Assisted Therapy OR doll therapy OR robot therapy OR Horticultural Therapy OR Art Therapy OR painting OR Spaced retrieval OR Music Therapy OR light therapy OR Occupational Therapy OR Play Therapy OR Recreation Therapy OR snoezelen OR multimodality therapy OR sensory OR sensory stimulation OR Transcutaneous Electric Nerve Stimulation OR TENS OR emotion oriented OR therapeutic conversation OR Meditation OR mindfulness OR Special care OR pet robot OR simulated presence therapy OR multisensorial OR multisensory OR brain stimulation |
| #4       | MeSH descriptor: [Behavioral Symptoms] explode all trees OR MeSH descriptor: [Psychomotor Agitation] explode all trees OR MeSH descriptor: [Irritable Mood] explode all trees OR MeSH descriptor: [Depressive Disorder] explode all trees OR MeSH descriptor: [Anxiety] explode all trees OR MeSH descriptor: [Hallucinations] explode all trees OR MeSH descriptor: [Sleep Deprivation] explode all trees OR MeSH descriptor: [Apathy] explode all trees OR MeSH descriptor: [Euphoria] explode all trees OR Behavioral Symptoms OR neuropsychic symptoms OR behavior OR behaviors OR behavior OR behaviours OR behavioral psychological symptoms OR behavioral and psychological symptoms OR behavioural and psychological symptoms OR BPSD OR BSD OR behavioral problems OR Problem Behavior OR repetitive behavior OR repetitive OR agitation OR pacing OR wander OR wanders OR wandering OR walking                                                                                                                                                                                                                                                                                                                                                                                                                                                                                                                                                                                                                                                                                                                                                                                                                                                                                                                                                                                                                                                                                                                                                                                                                                                                                                                                                                                        |

|    |                                                                                                                                                                                                                                                                                                                                                                                                                                                                                                                                                                                                                                                                                                                                                                                                                    |
|----|--------------------------------------------------------------------------------------------------------------------------------------------------------------------------------------------------------------------------------------------------------------------------------------------------------------------------------------------------------------------------------------------------------------------------------------------------------------------------------------------------------------------------------------------------------------------------------------------------------------------------------------------------------------------------------------------------------------------------------------------------------------------------------------------------------------------|
|    | OR safe walking OR sundowning OR Night time behavior OR challenging behavior OR disruptive OR restless OR Psychomotor Agitation OR Irritability OR Irritable Mood OR Disinhibition OR aggression OR aggressive OR aberrant OR aberrant motor behavior OR social inappropriateness OR vocalization OR vocalization OR psychomotor activity OR psychosis OR Psychotic Disorders OR psycho OR psycho social OR neuropsychiatric symptom OR depression OR depressive OR depressive disorder OR mood disturbance OR anxiety OR delusions OR depressive disorder OR hallucination OR Sleep disturbance OR Sleep disorders OR Sleeping disorders OR Sleep Deprivation OR apathy OR Indifference OR dysphoria OR Euphoria OR Elation OR Appetite OR Eating change OR personality change OR behavioural OR neuropsychiatric |
| #5 | MeSH descriptor: [Systematic Review] explode all trees OR MeSH descriptor: [Meta-Analysis] explode all trees OR (systematic review):ti,ab,kw OR (meta analysis):ti,ab,kw OR (meta analysis) OR (systematic review)                                                                                                                                                                                                                                                                                                                                                                                                                                                                                                                                                                                                 |
| #6 | #1 AND #2 AND #3 AND #4 AND #5 AND #6                                                                                                                                                                                                                                                                                                                                                                                                                                                                                                                                                                                                                                                                                                                                                                              |
| #7 | #7 AND (Limit: publication date from Jan 2012 to Mar 2022, limit in Cochrane Reviews)                                                                                                                                                                                                                                                                                                                                                                                                                                                                                                                                                                                                                                                                                                                              |

# Reporting checklist for protocol of a systematic review and meta analysis.

|                     |                     | Reporting Item                                                                                                                            | Page Number |
|---------------------|---------------------|-------------------------------------------------------------------------------------------------------------------------------------------|-------------|
| <b>Title</b>        |                     |                                                                                                                                           |             |
| Identification      | <a href="#">#1a</a> | Identify the report as a protocol of a systematic review                                                                                  | p.1         |
| Update              | <a href="#">#1b</a> | If the protocol is for an update of a previous systematic review, identify as such                                                        | na          |
| <b>Registration</b> |                     |                                                                                                                                           |             |
|                     | <a href="#">#2</a>  | If registered, provide the name of the registry (such as PROSPERO) and registration number                                                | p.2         |
| <b>Authors</b>      |                     |                                                                                                                                           |             |
| Contact             | <a href="#">#3a</a> | Provide name, institutional affiliation, e-mail address of all protocol authors; provide physical mailing address of corresponding author | p.1         |
| Contribution        | <a href="#">#3b</a> | Describe contributions of protocol authors and identify the guarantor of the review                                                       | p.1<br>p.10 |
| <b>Amendments</b>   |                     |                                                                                                                                           |             |

|    |                      |                     |                                                          |         |
|----|----------------------|---------------------|----------------------------------------------------------|---------|
| 1  |                      | <a href="#">#4</a>  | If the protocol represents an amendment of a previously  | na      |
| 2  |                      |                     | completed or published protocol, identify as such and    |         |
| 3  |                      |                     | list changes; otherwise, state plan for documenting      |         |
| 4  |                      |                     | important protocol amendments                            |         |
| 5  |                      |                     |                                                          |         |
| 6  |                      |                     |                                                          |         |
| 7  |                      |                     |                                                          |         |
| 8  |                      |                     |                                                          |         |
| 9  |                      |                     |                                                          |         |
| 10 |                      |                     |                                                          |         |
| 11 | <b>Support</b>       |                     |                                                          |         |
| 12 |                      |                     |                                                          |         |
| 13 |                      |                     |                                                          |         |
| 14 | Sources              | <a href="#">#5a</a> | Indicate sources of financial or other support for the   | p.10-11 |
| 15 |                      |                     | review                                                   |         |
| 16 |                      |                     |                                                          |         |
| 17 |                      |                     |                                                          |         |
| 18 |                      |                     |                                                          |         |
| 19 | Sponsor              | <a href="#">#5b</a> | Provide name for the review funder and / or sponsor      | p.10-11 |
| 20 |                      |                     |                                                          |         |
| 21 |                      |                     |                                                          |         |
| 22 | Role of sponsor      | <a href="#">#5c</a> | Describe roles of funder(s), sponsor(s), and / or        | p.10-11 |
| 23 |                      |                     | institution(s), if any, in developing the protocol       |         |
| 24 | or funder            |                     |                                                          |         |
| 25 |                      |                     |                                                          |         |
| 26 |                      |                     |                                                          |         |
| 27 |                      |                     |                                                          |         |
| 28 | <b>Introduction</b>  |                     |                                                          |         |
| 29 |                      |                     |                                                          |         |
| 30 |                      |                     |                                                          |         |
| 31 | Rationale            | <a href="#">#6</a>  | Describe the rationale for the review in the context of  | p.4-5   |
| 32 |                      |                     | what is already known                                    |         |
| 33 |                      |                     |                                                          |         |
| 34 |                      |                     |                                                          |         |
| 35 |                      |                     |                                                          |         |
| 36 | Objectives           | <a href="#">#7</a>  | Provide an explicit statement of the question(s) the     | p.6-7   |
| 37 |                      |                     | review will address with reference to participants,      |         |
| 38 |                      |                     | interventions, comparators, and outcomes (PICO)          |         |
| 39 |                      |                     |                                                          |         |
| 40 |                      |                     |                                                          |         |
| 41 |                      |                     |                                                          |         |
| 42 |                      |                     |                                                          |         |
| 43 |                      |                     |                                                          |         |
| 44 | <b>Methods</b>       |                     |                                                          |         |
| 45 |                      |                     |                                                          |         |
| 46 |                      |                     |                                                          |         |
| 47 | Eligibility criteria | <a href="#">#8</a>  | Specify the study characteristics (such as PICO, study   | p.7-8   |
| 48 |                      |                     | design, setting, time frame) and report characteristics  |         |
| 49 |                      |                     | (such as years considered, language, publication status) |         |
| 50 |                      |                     | to be used as criteria for eligibility for the review    |         |
| 51 |                      |                     |                                                          |         |
| 52 |                      |                     |                                                          |         |
| 53 |                      |                     |                                                          |         |
| 54 |                      |                     |                                                          |         |
| 55 |                      |                     |                                                          |         |
| 56 |                      |                     |                                                          |         |
| 57 |                      |                     |                                                          |         |
| 58 |                      |                     |                                                          |         |
| 59 |                      |                     |                                                          |         |
| 60 |                      |                     |                                                          |         |

|    |                   |                      |                                                             |            |
|----|-------------------|----------------------|-------------------------------------------------------------|------------|
| 1  | Information       | <a href="#">#9</a>   | Describe all intended information sources (such as          | p.6        |
| 2  |                   |                      |                                                             |            |
| 3  | sources           |                      | electronic databases, contact with study authors, trial     |            |
| 4  |                   |                      | registers or other grey literature sources) with planned    |            |
| 5  |                   |                      | dates of coverage                                           |            |
| 6  |                   |                      |                                                             |            |
| 7  |                   |                      |                                                             |            |
| 8  |                   |                      |                                                             |            |
| 9  |                   |                      |                                                             |            |
| 10 |                   |                      |                                                             |            |
| 11 | Search strategy   | <a href="#">#10</a>  | Present draft of search strategy to be used for at least    | p.6-7      |
| 12 |                   |                      | one electronic database, including planned limits, such     |            |
| 13 |                   |                      | that it could be repeated                                   | supplement |
| 14 |                   |                      |                                                             |            |
| 15 |                   |                      |                                                             |            |
| 16 |                   |                      |                                                             |            |
| 17 |                   |                      |                                                             |            |
| 18 | Study records -   | <a href="#">#11a</a> | Describe the mechanism(s) that will be used to manage       | p.7        |
| 19 | data management   |                      | records and data throughout the review                      |            |
| 20 |                   |                      |                                                             |            |
| 21 |                   |                      |                                                             |            |
| 22 |                   |                      |                                                             |            |
| 23 |                   |                      |                                                             |            |
| 24 | Study records -   | <a href="#">#11b</a> | State the process that will be used for selecting studies   | p.7        |
| 25 | selection process |                      | (such as two independent reviewers) through each            |            |
| 26 |                   |                      | phase of the review (that is, screening, eligibility and    |            |
| 27 |                   |                      | inclusion in meta-analysis)                                 |            |
| 28 |                   |                      |                                                             |            |
| 29 |                   |                      |                                                             |            |
| 30 |                   |                      |                                                             |            |
| 31 |                   |                      |                                                             |            |
| 32 |                   |                      |                                                             |            |
| 33 |                   |                      |                                                             |            |
| 34 | Study records -   | <a href="#">#11c</a> | Describe planned method of extracting data from reports     | p.8        |
| 35 | data collection   |                      | (such as piloting forms, done independently, in             |            |
| 36 |                   |                      | duplicate), any processes for obtaining and confirming      |            |
| 37 | process           |                      | data from investigators                                     |            |
| 38 |                   |                      |                                                             |            |
| 39 |                   |                      |                                                             |            |
| 40 |                   |                      |                                                             |            |
| 41 |                   |                      |                                                             |            |
| 42 |                   |                      |                                                             |            |
| 43 |                   |                      |                                                             |            |
| 44 | Data items        | <a href="#">#12</a>  | List and define all variables for which data will be sought | p.8        |
| 45 |                   |                      | (such as PICO items, funding sources), any pre-planned      |            |
| 46 |                   |                      | data assumptions and simplifications                        |            |
| 47 |                   |                      |                                                             |            |
| 48 |                   |                      |                                                             |            |
| 49 |                   |                      |                                                             |            |
| 50 |                   |                      |                                                             |            |
| 51 | Outcomes and      | <a href="#">#13</a>  | List and define all outcomes for which data will be         | p.7        |
| 52 | prioritization    |                      | sought, including prioritization of main and additional     |            |
| 53 |                   |                      | outcomes, with rationale                                    |            |
| 54 |                   |                      |                                                             |            |
| 55 |                   |                      |                                                             |            |
| 56 |                   |                      |                                                             |            |
| 57 |                   |                      |                                                             |            |
| 58 |                   |                      |                                                             |            |
| 59 |                   |                      |                                                             |            |
| 60 |                   |                      |                                                             |            |

|    |                    |                      |                                                            |      |
|----|--------------------|----------------------|------------------------------------------------------------|------|
| 1  | Risk of bias in    | <a href="#">#14</a>  | Describe anticipated methods for assessing risk of bias    | p.8  |
| 2  |                    |                      |                                                            |      |
| 3  | individual studies |                      | of individual studies, including whether this will be done |      |
| 4  |                    |                      |                                                            |      |
| 5  |                    |                      | at the outcome or study level, or both; state how this     |      |
| 6  |                    |                      |                                                            |      |
| 7  |                    |                      | information will be used in data synthesis                 |      |
| 8  |                    |                      |                                                            |      |
| 9  |                    |                      |                                                            |      |
| 10 |                    |                      |                                                            |      |
| 11 | Data synthesis     | <a href="#">#15a</a> | Describe criteria under which study data will be           | p.9  |
| 12 |                    |                      |                                                            |      |
| 13 |                    |                      | quantitatively synthesised                                 |      |
| 14 |                    |                      |                                                            |      |
| 15 |                    |                      |                                                            |      |
| 16 | Data synthesis     | <a href="#">#15b</a> | If data are appropriate for quantitative synthesis,        | na   |
| 17 |                    |                      |                                                            |      |
| 18 |                    |                      | describe planned summary measures, methods of              |      |
| 19 |                    |                      |                                                            |      |
| 20 |                    |                      | handling data and methods of combining data from           |      |
| 21 |                    |                      |                                                            |      |
| 22 |                    |                      | studies, including any planned exploration of              |      |
| 23 |                    |                      |                                                            |      |
| 24 |                    |                      | consistency (such as I <sup>2</sup> , Kendall's $\tau$ )   |      |
| 25 |                    |                      |                                                            |      |
| 26 |                    |                      |                                                            |      |
| 27 |                    |                      |                                                            |      |
| 28 | Data synthesis     | <a href="#">#15c</a> | Describe any proposed additional analyses (such as         | na   |
| 29 |                    |                      |                                                            |      |
| 30 |                    |                      | sensitivity or subgroup analyses, meta-regression)         |      |
| 31 |                    |                      |                                                            |      |
| 32 |                    |                      |                                                            |      |
| 33 |                    |                      |                                                            |      |
| 34 | Data synthesis     | <a href="#">#15d</a> | If quantitative synthesis is not appropriate, describe the | p.9  |
| 35 |                    |                      |                                                            |      |
| 36 |                    |                      | type of summary planned                                    |      |
| 37 |                    |                      |                                                            |      |
| 38 |                    |                      |                                                            |      |
| 39 | Meta-bias(es)      | <a href="#">#16</a>  | Specify any planned assessment of meta-bias(es) (such      | p.9  |
| 40 |                    |                      |                                                            |      |
| 41 |                    |                      | as publication bias across studies, selective reporting    |      |
| 42 |                    |                      |                                                            |      |
| 43 |                    |                      | within studies)                                            |      |
| 44 |                    |                      |                                                            |      |
| 45 |                    |                      |                                                            |      |
| 46 |                    |                      |                                                            |      |
| 47 | Confidence in      | <a href="#">#17</a>  | Describe how the strength of the body of evidence will     | p.10 |
| 48 |                    |                      |                                                            |      |
| 49 | cumulative         |                      | be assessed (such as GRADE)                                |      |
| 50 |                    |                      |                                                            |      |
| 51 | evidence           |                      |                                                            |      |
| 52 |                    |                      |                                                            |      |
| 53 |                    |                      |                                                            |      |
| 54 |                    |                      |                                                            |      |

None The PRISMA-P elaboration and explanation paper is distributed under the terms of the Creative Commons Attribution License CC-BY. This checklist can be completed online using



1 <https://www.goodreports.org/>, a tool made by the [EQUATOR Network](#) in collaboration with

2  
3 [Penelope.ai](#)

4  
5  
6  
7  
8  
9 Moher D, Shamseer L, Clarke M, Ghersi D, Liberati A, Petticrew M, Shekelle P, Stewart LA. Preferred  
10 Reporting Items for Systematic Review and Meta-Analysis Protocols (PRISMA-P) 2015 statement.  
11 Syst Rev. 2015;4(1):1.  
12  
13  
14  
15  
16  
17  
18  
19  
20  
21  
22  
23  
24  
25  
26  
27  
28  
29  
30  
31  
32  
33  
34  
35  
36  
37  
38  
39  
40  
41  
42  
43  
44  
45  
46  
47  
48  
49  
50  
51  
52  
53  
54  
55  
56  
57  
58  
59  
60

# BMJ Open

## Symptom-Specific Non-Pharmacological Interventions for Behavioral and Psychological Symptoms of Dementia: Protocol of an Umbrella Review of Systematic Reviews of Randomized Controlled Trials

|                                 |                                                                                                                                                                                                                                                                                                                                                                                                                                                                                                                                                                                                                      |
|---------------------------------|----------------------------------------------------------------------------------------------------------------------------------------------------------------------------------------------------------------------------------------------------------------------------------------------------------------------------------------------------------------------------------------------------------------------------------------------------------------------------------------------------------------------------------------------------------------------------------------------------------------------|
| Journal:                        | <i>BMJ Open</i>                                                                                                                                                                                                                                                                                                                                                                                                                                                                                                                                                                                                      |
| Manuscript ID                   | bmjopen-2022-070317.R1                                                                                                                                                                                                                                                                                                                                                                                                                                                                                                                                                                                               |
| Article Type:                   | Protocol                                                                                                                                                                                                                                                                                                                                                                                                                                                                                                                                                                                                             |
| Date Submitted by the Author:   | 26-Jan-2023                                                                                                                                                                                                                                                                                                                                                                                                                                                                                                                                                                                                          |
| Complete List of Authors:       | Cho, Eunhee; Yonsei University, Mo-Im Kim Nursing Research Institute, Yonsei University College of Nursing<br>Kim, Min Jung; Yonsei University College of Nursing, Mo-Im Kim Nursing Research Institute, Yonsei University College of Nursing<br>Yang, Minhee; Yonsei University, College of Nursing and Brain Korea 21 FOUR Project<br>Jang, Jiyeon; Yonsei University, College of Nursing and Brain Korea 21 FOUR Project<br>Cho, Jungwon; Yonsei University, College of Nursing<br>Lee, Ji Yeon; Yonsei University College of Nursing, Mo-Im Kim Nursing Research Institute, Yonsei University College of Nursing |
| <b>Primary Subject Heading</b>: | Neurology                                                                                                                                                                                                                                                                                                                                                                                                                                                                                                                                                                                                            |
| Secondary Subject Heading:      | Geriatric medicine, Neurology, Evidence based practice                                                                                                                                                                                                                                                                                                                                                                                                                                                                                                                                                               |
| Keywords:                       | Dementia < NEUROLOGY, MENTAL HEALTH, Delirium & cognitive disorders < PSYCHIATRY                                                                                                                                                                                                                                                                                                                                                                                                                                                                                                                                     |
|                                 |                                                                                                                                                                                                                                                                                                                                                                                                                                                                                                                                                                                                                      |

SCHOLARONE™  
Manuscripts

**TITLE PAGE****Title:**

Symptom-Specific Non-Pharmacological Interventions for Behavioral and Psychological Symptoms of Dementia: Protocol of an Umbrella Review of Systematic Reviews of Randomized Controlled Trials

**List of authors:**

Eunhee Cho

Mo-Im Kim Nursing Research Institute, Yonsei University College of Nursing, Seoul, South Korea

Min Jung Kim

Mo-Im Kim Nursing Research Institute, Yonsei University College of Nursing, Seoul, South Korea

Minhee Yang

College of Nursing and Brain Korea 21 FOUR Project , Yonsei University, Seoul, South Korea

Jiyeon Jang

College of Nursing and Brain Korea 21 FOUR Project , Yonsei University, Seoul, South Korea

Jungwon Cho

College of Nursing, Yonsei University, Seoul, South Korea

Ji Yeon Lee

Mo-Im Kim Nursing Research Institute, Yonsei University College of Nursing, Seoul, South Korea

**Corresponding author:** Ji Yeon Lee, RN, GNP-BC, PhD

Yonsei University College of Nursing, 50-1 Yonsei-Ro, Seodaemun-Gu, Seoul, South Korea, 03722

email: lovecolakr@gmail.com; tel: 82-2-2228-3344; fax: 82-2-2227-8303

**Word count**, excluding title page, abstract, references, figures and tables: 2,158

## ABSTRACT

**Introduction:** There are various non-pharmacological interventions for dementia care. However, healthcare providers continue to face challenges in determining the most suitable interventions for the behavioral and psychological symptoms of dementia, which vary according to individuals. This umbrella review aims to identify and summarize the effective non-pharmacological interventions for each sub-symptom to provide individualized, evidence-based recommendations for clinical practice.

**Methods and analysis:** This review follows the guideline of the Cochrane methodology for umbrella reviews. It focuses only on systematic reviews with or without a meta-analysis of randomized controlled trials. Five electronic databases: PubMed, Cumulative Index to Nursing and Allied Health Literature (CINAHL), Embase, PsycINFO, and Cochrane Database, will be searched. The screened systematic reviews will be determined for eligibility by the PICO formulation: (Population) older adults with dementia of any type; (Intervention) all types of non-pharmacological intervention; (Comparison) usual care or other non-pharmacological intervention; and (Outcome) behavioral and psychological symptoms of dementia and its sub-symptoms. The quality of the individual systematic reviews will be appraised using A Measurement Tool to Assess Systematic Reviews 2 (AMSTAR 2). The overlap of primary studies will also be considered by eliminating an old-date systematic review conducted by the same authors with the same interest and calculating the Corrected Covered Area. Data will be extracted according to the pre-determined formula, which will organize non-pharmacological interventions according to the sub-symptoms of behavioral and psychological symptoms of dementia and not according to the type of intervention.

**Ethics and dissemination:** Since this is a review paper, ethical approval is not required. The findings of this review will be disseminated through publication in a peer-reviewed journal.

**Registration details:** The protocol of this umbrella review is registered in the International Prospective Register of Systematic Reviews (Prospero: CRD42022340930).

**Keywords:** Behavioral and psychological symptoms of dementia, dementia, non-pharmacological therapies, protocol, umbrella review.

**Strengths and limitations of this study**

- The umbrella review approach allows us to conduct a tertiary-level review to summarize and synthesize the results from systematic reviews according to the researcher's interest in the phenomenon.
- Eligibility screening, quality appraisal, and data extraction will be duplicated by at least two authors.
- The findings from the umbrella review will provide recommendations for readily applicable guidelines in clinical practice.
- A limitation of this umbrella review will be an exclusion of non-English systematic reviews or individual randomized controlled trials that are not included in any systematic review, albeit with a rigorous literature search.

peer review only

## MAIN TEXT

### INTRODUCTION

A growing number of people are living with dementia; currently, the prevalence of people living with dementia is reported to be 55 million worldwide [1]. Caring for people living with dementia is burdensome owing to the progressive decline in their cognitive function and gradual loss of daily and social functioning. In particular, it is challenging to provide care for persons who manifest the Behavioral and Psychological Symptoms of Dementia (BPSD), which can lead to caregiver fatigue, depression, and burnout [2].

BPSD, often called neuropsychiatric symptoms of dementia [3], are a set of heterogeneous non-cognitive symptoms. The Neuropsychiatric Inventory (NPI) is a commonly used tool in categorizing BPSD and includes aberrant motor behaviors, agitation or aggression, anxiety, apathy, appetite disorder, delusions, depression, disinhibition, elation/euphoria, hallucinations, irritability, and sleep disorder [4]. Although BPSD is most common during the mid-stage of dementia, symptoms can appear at any stage, with fluctuating severity. Over 90% of persons living with dementia will suffer from BPSD at some point, whether their symptoms present singularly or in clusters [3]. Previous studies have consistently reported the negative consequences of BPSD, such as poor quality of life in persons living with dementia and their caregivers, impaired daily functioning, a threat to safety [5], nursing home admission [6], caregiver burden [7], and increased mortality [8].

In recent years, there have been arguments about BPSD as this terminology may evoke a negative perspective toward the symptoms of dementia, framing them as problems to be solved or treated using pharmacological intervention or physical restraint [9]. Among the various terminologies suggested, unmet needs seem to be neutral terminology, which is broadly accepted by persons living with dementia and their caregivers [10,11].

Although this umbrella review will use the term BPSD for the categorization of the

1  
2  
3  
4 symptoms, the unmet needs model must also be considered. The perspective to view BPSD as  
5  
6 an unmet need particularly emphasizes the necessity of non-pharmacological interventions as  
7  
8 a frame for understanding personhood, taking action to fulfill unmet needs, and eventually  
9  
10 improving symptoms [12-14]. Non-pharmacological interventions, such as behavioral  
11  
12 therapy, validation therapy, psychotherapy, reminiscence, person-centered care, music  
13  
14 therapy, bright-light therapy, and multisensory approaches are widely considered first-line  
15  
16 interventions for BPSD today [15-17]. These interventions are considered non-invasive, safe,  
17  
18 and have fewer adverse effects than pharmacological interventions [5]. In particular, among  
19  
20 older adults who take multiple medications for medical conditions other than dementia, non-  
21  
22 pharmacological interventions present a safer option to prevent drug-to-drug interactions and  
23  
24 adverse effects of neuropsychiatric medications [18,19]. The non-pharmacological  
25  
26 interventions also allow the involvement of various professionals, making them easier to be  
27  
28 implemented in diverse clinical settings.  
29  
30  
31  
32  
33

34 The growing attention toward the benefits of non-pharmacological interventions,  
35  
36 have led to many primary trials and reviews being published. In dementia research, umbrella  
37  
38 reviews have been conducted to investigate the effectiveness of non-pharmacological therapy  
39  
40 for BPSD by synthesizing the results from secondary-level synthesis reviews (e.g., systematic  
41  
42 reviews [SR]). The findings from these tertiary-level reviews have generally shown that non-  
43  
44 pharmacological interventions were effective in improving BPSD [20-23]. Regarding  
45  
46 individual non-pharmacological therapy, music therapy and cognitive behavior therapy were  
47  
48 effective in treating symptoms of depression or anxiety [22,24,25], whereas home-based  
49  
50 behavioral management, person-centered care, and dementia care mapping were effective for  
51  
52 addressing severe agitation [24].  
53  
54  
55  
56

57 Although previously published umbrella reviews have focused on the types of non-  
58  
59 pharmacological interventions, such approaches have failed to provide practical guidance in  
60

1  
2  
3  
4 clinical settings because BPSD presents as a symptom or cluster of symptoms. In current  
5  
6 evidence, the effectiveness of non-pharmacological interventions for each sub-symptom of  
7  
8 BPSD is also limited to certain symptoms (i.e., depression, anxiety, and agitation) [22,24,25].  
9  
10 Healthcare providers still face the challenge of which non-pharmacological interventions  
11  
12 should be chosen depending on the clinical manifestations, despite the evidence to apply and  
13  
14 choose interventions because there is no guidance [26]. BPSD has a complex etiology with a  
15  
16 wide range of 12 symptoms. Furthermore, each symptom has several determinants; therefore,  
17  
18 it is difficult to identify which interventions would be effective for each symptom [27].  
19  
20 Considering the complexity of BPSD etiology, there is no non-pharmacological treatment  
21  
22 that covers all the symptoms. However, to be helpful in clinical settings, a review of non-  
23  
24 pharmacological interventions of BPSD according to its sub-symptoms is required. Thus, this  
25  
26 umbrella review aims to identify and evaluate evidence regarding symptom-specific non-  
27  
28 pharmacological interventions to reduce BPSD in older adults living with dementia. In  
29  
30 particular, we will focus on investigating the effectiveness of non-pharmacological  
31  
32 interventions on the sub-symptoms of BPSD. The primary review question underlying this  
33  
34 umbrella review is “What are the most effective non-pharmacological interventions to reduce  
35  
36 each BPSD and the sub-symptoms of BPSD?” The secondary review questions are “Which  
37  
38 sub-symptoms of BPSD were targeted for non-pharmacological interventions?” and “What  
39  
40 are the types and characteristics of non-pharmacological interventions used to reduce each  
41  
42 sub-symptom of BPSD?”  
43  
44  
45  
46  
47  
48  
49  
50  
51

## 52 **METHODS**

### 53 **Study design**

54  
55 This umbrella review will follow the guideline of Cochrane methodology for  
56  
57 umbrella reviews [28]. Before starting the review, we registered the protocol of this review at  
58  
59  
60



1  
2  
3  
4 the International Prospective Register of Systematic Reviews (PROSPERO; ref no.  
5  
6 CRD42022340930). The anticipated start and end dates of the review are from February  
7  
8 2023–September 2023.  
9

## 10 **Search methods**

11  
12  
13 We have developed search strategies through several research meetings and  
14  
15 consultations with a university librarian. The search databases will include PubMed,  
16  
17 Cumulative Index to Nursing and Allied Health Literature (CINAHL), PsycINFO, Embase,  
18  
19 and the Cochrane Database of Systematic Reviews. The search date range will comprise the  
20  
21 last ten years (January 2012–January 2023) to capture the most recent comprehensive  
22  
23 findings based on the methodological recommendations on conducting umbrella reviews  
24  
25 [29]. Peer-reviewed SRs published in English will be included.  
26  
27  
28

29 The PICO framework of our umbrella review is as follows:

- 30 1. Population: Older adults with dementia of any type
- 31 2. Intervention: All types of non-pharmacological interventions
- 32 3. Comparison: Usual care, waitlist control, or other types of non-pharmacological  
33 interventions
- 34 4. Outcome: One or more BPSD-related symptoms measured using a valid  
35 measurement tool

36  
37 The search terms were developed based on this PICO framework. The key search  
38  
39 terms include “older adult” AND “dementia” AND “non-pharmacological intervention”  
40  
41 AND “BPSD” AND “systematic review.” We consulted a university librarian, an expert in  
42  
43 literature searches, about the search terms before commencing the search. Supplementary  
44  
45 tables A1–A5 show examples of an organized search term for each search engine.  
46  
47

48  
49 After searching for potential sources of evidence, data will be extracted, and  
50  
51 duplicates will be removed using EndNote and Excel. Two independent authors will perform  
52  
53  
54  
55  
56  
57  
58  
59  
60

1  
2  
3  
4 the initial screening of the titles and abstracts, and the discordance in crosschecks at this  
5  
6 phase will be resolved through research team meetings. After excluding irrelevant SRs, we  
7  
8 will investigate the full texts. Four independent authors will be involved in the full-text  
9  
10 screening. Specifically, the four authors will be divided into two teams, and each team of two  
11  
12 authors will review the assigned number of SRs. Where agreement cannot be reached  
13  
14 between the two authors within the team, a third author from another team will be consulted  
15  
16 to decide eligibility. To increase the consistency of study selection between the two teams,  
17  
18 the full text will be cross-checked and reviewed by one author from another team. Thus, at  
19  
20 least three authors will review each SR to determine its suitability for eligibility.  
21  
22  
23  
24

### 25 **Inclusion and exclusion criteria**

26  
27 A specific description of each category for study selection is presented in Table 1. In  
28  
29 addition to the PICO framework, the scope of our umbrella review will be limited to SRs  
30  
31 with randomized controlled trials (RCTs) only and will mainly target interventions in  
32  
33 community and long-term care settings where persons living with dementia maintain their  
34  
35 daily routines.  
36  
37  
38

### 39 **Quality appraisal**

40  
41 A Measurement Tool to Assess Reviews 2 (AMSTAR 2) will be used to evaluate the  
42  
43 methodological quality of the SRs [30]. Two independent authors will assess the quality of  
44  
45 the included SRs and provide their decision on 16 items of AMSTAR 2. Before beginning the  
46  
47 process, the two authors will pilot the use of AMSTAR 2 on two or three SRs or meta-  
48  
49 analyses to ensure consistent ratings between the authors. For each item, the answer will be  
50  
51 “yes,” “partial yes,” or “no.” Any disagreement between the two authors and uncertainties  
52  
53 will be resolved by consensus and team meetings. Each SR will be categorized into “high”  
54  
55 (none or one “non-critical weakness”), “moderate” (more than one “non-critical weakness”),  
56  
57 “low” (one “critical flaw with/without “non-critical weakness”), or “critically low” (more  
58  
59  
60

1  
2  
3  
4 than one “critical flaw” with/without “non-critical weakness”) using the online AMSTAR 2  
5  
6 ([https://amstar.ca/Amstar\\_Checklist.php](https://amstar.ca/Amstar_Checklist.php)) [30].  
7  
8

### 9 **Data extraction**

10  
11 We will extract data from the SRs in two stages. First, descriptive characteristics of  
12  
13 SRs will be extracted, including author, publication year, number of RCTs included, number  
14  
15 of primary studies included, number of participants included, purpose, date of search,  
16  
17 population (i.e., age range, dementia type), type of intervention and control, key findings (i.e.,  
18  
19 outcomes, effect sizes), and the certainty of the evidence described. Key findings related to  
20  
21 our review questions will then be extracted, especially focusing on the sub-symptoms of  
22  
23 BPSD according to the NPI [4]. Data extraction will be further refined as a review process  
24  
25 and will be explained in the final review.  
26  
27  
28

29  
30 Before starting the data extraction, a template will be created using Excel through a  
31  
32 team discussion. The data will be extracted by one author using this template. Two other  
33  
34 authors will review the extracted data and crosscheck them. Accordingly, three authors will  
35  
36 conduct the data extraction. Any uncertainties or discordance between authors will be  
37  
38 resolved through a review team meeting.  
39  
40

41  
42 Regarding the overlap of primary RCTs, we will use the Corrected Covered Area  
43  
44 (CCA) to address the degree of overlapping. A CCA matrix will be formulated with columns  
45  
46 (included SRs) and rows (included RCTs in each SR), and the CCA will be calculated and  
47  
48 demonstrated in a table [31]. The CCA is calculated by multiplying the number of the first  
49  
50 occurrence of primary RCTs by the total number of reviews and then subtracting the number  
51  
52 of the first occurrence of primary RCTs. This value will then be used to divide the value  
53  
54 obtained by subtracting the number of first occurrences of primary RCTs from the total  
55  
56 number of RCTs, including double counting. The degree of overlap is determined by the  
57  
58 following criteria: 0–5% indicates low overlap; 6–10% moderate overlap; 11–15% high  
59  
60

1  
2  
3  
4 overlap, and greater than 15% indicates a very high overlap [31]. If there are SRs conducted  
5  
6 by the same authors to update the previous SR with the same interest, only the most recent  
7  
8 SR will be included [32].  
9

### 10 **Data synthesis**

11  
12  
13 First, a narrative synthesis will be presented. The BPSD-related outcomes will be  
14  
15 organized in the tables, and statistical data obtained from the meta-analysis will be presented  
16  
17 as odds ratios or risk ratios if described in the included SRs. Then, we will resynthesize all  
18  
19 the BPSD outcomes based on the sub-symptoms of BPSD. If possible, we will summarize the  
20  
21 intervention effects for each intervention according to the sub-symptoms of BPSD. The  
22  
23 results will be synthesized considering each review's quality and CCA scores, and continuous  
24  
25 team meetings will be conducted to determine the review selection and data synthesis  
26  
27 according to the review quality and CCA scores.  
28  
29  
30

### 31 **Confidence in the synthesized findings of the review**

32  
33  
34 This umbrella review will examine and summarize the certainty of the evidence  
35  
36 described in each SR if it evaluated its confidence using a tool such as the Grading of  
37  
38 Recommendations Assessment, Development, and Evaluation approach.  
39  
40

### 41 **Patient and public involvement**

42  
43 This umbrella review analyzes existing systematic research, which includes no patients  
44  
45 or members of the public.  
46  
47  
48  
49

## 50 **DISCUSSION**

51  
52 BPSD can pose a great challenge in dementia care. Although tertiary reviews exist,  
53  
54 no reviews based on the sub-symptoms of BPSD have been conducted thus far. Given the  
55  
56 limitations in the choice of resources in real-world settings, reviews on BPSD based on sub-  
57  
58 symptoms are urgently needed. This umbrella review will provide a substantial update on  
59  
60

1  
2  
3  
4 previous overviews of BSPD [20-25]. Unlike previous reviews, this umbrella review will  
5  
6 synthesize the results according to the sub-symptoms of BPSD. Therefore, we believe that  
7  
8 our umbrella review will provide recommendations for readily applicable guidelines in  
9  
10 dementia care.  
11  
12  
13  
14

## 15 **ETHICS AND DISSEMINATION**

16  
17 Ethical approval was not required for the umbrella review or protocol. The findings of  
18  
19 the umbrella review will be shared through publication in a peer-reviewed journal.  
20  
21

## 22 **AUTHORS' CONTRIBUTIONS**

23  
24 EC, JYL, and MJK led the conceptualization and design of this work. JYL registered  
25  
26 the protocol in PROSPERO. MJK organized a search strategy. EC, MJK, MY, JJ, JC, and  
27  
28 JYL provided input into the study design and search strategy and edited the draft protocol.  
29  
30 EC, MJK, MY, JJ, JC, and JYL read and approved the final manuscript.  
31  
32

## 33 **ACKNOWLEDGEMENT**

34  
35 We are grateful to Na Won Kim of Yonsei University Medical Library for her  
36  
37 helpful comments on search strategy.  
38  
39

## 40 **FUNDING STATEMENT**

41  
42 This work was supported by a National Research Foundation of Korea (NRF) grant  
43  
44 funded by the Korea government (Ministry of Science and ICT) (NRF-2022R1F1A1064146)  
45  
46 and supported by the Basic Science Research Program through the NRF funded by the  
47  
48 Ministry of Education (NRF-2020R1A6A1A03041989).  
49

## 50 **COMPETING INTEREST**

51  
52 The authors have no conflicts of interest to declare.  
53  
54  
55  
56  
57  
58  
59  
60

**REFERENCE**

- [1] World Health Organization. Dementia. 2022. Available:<https://www.who.int/news-room/fact-sheets/detail/dementia> [Accessed 10 October 2022].
- [2] Alzheimer's Disease International. World Alzheimer Report 2021. 2021. Available:<https://www.alzint.org/resource/world-alzheimer-report-2021/> [Accessed Oct 10 2022].
- [3] Walaszek A. Behavioral and psychological symptoms of dementia. American Psychiatric Association, 2020.
- [4] Kaufer DI, Cummings JL, Ketchel P, et al. Validation of the NPI-Q, a brief clinical form of the Neuropsychiatric Inventory. *J Neuropsychiatry Clin Neurosci* 2000;12:233-9.
- [5] Gerlach LB, Kales HC. Managing behavioral and psychological symptoms of dementia. *Psychiatr Clin North Am* 2018;41:127-39.
- [6] Toot S, Swinson T, Devine M, et al. Causes of nursing home placement for older people with dementia: A systematic review and meta-analysis. *Int Psychogeriatr* 2017;29:195-208.
- [7] Connors MH, Seeher K, Teixeira-Pinto A, et al. Dementia and caregiver burden: A three-year longitudinal study. *Int J Geriatr Psychiatry* 2020;35:250-8.
- [8] Bränsvik V, Granvik E, Minthon L, et al. Mortality in patients with behavioural and psychological symptoms of dementia: A registry-based study. *Aging Ment Health* 2021;25:1101-9.
- [9] Wolverson E, Dunn R, Moniz-Cook E, et al. The language of behaviour changes in dementia: A mixed methods survey exploring the perspectives of people with dementia. *J Adv Nurs* 2021;77:1992-2001.

- 1  
2  
3  
4 [10] Cunningham C, Macfarlane S, Brodaty H. Language paradigms when behaviour  
5 changes with dementia : #BanBPSD. *Int J Geriatr Psychiatry* 2019;34:1109-13.  
6  
7  
8  
9 [11] Wolverson E, Moniz-Cook E, Dunn R, et al. Family carer perspectives on the  
10 language of behaviour change in dementia: an online mixed methods survey. *Age*  
11 *Ageing* 2022;51.  
12  
13  
14  
15 [12] Algase DL, Beck C, Kolanowski A, et al. Need-driven dementia-compromised  
16 behavior: An alternative view of disruptive behavior. *Am J Alzheimers Dis Other*  
17 *Demem* 1996;11:10-9.  
18  
19  
20  
21  
22 [13] Cohen-Mansfield J. Nonpharmacologic treatment of behavioral disorders in dementia.  
23 *Curr Treat Options Neurol* 2013;15:765-85.  
24  
25  
26  
27 [14] Stokes G. Challenging behaviour in dementia : a person-centred approach. Stokes,  
28 Graham, 2000.  
29  
30  
31  
32 [15] Alzheimer's Society. Optimising treatment and care for people with behavioural and  
33 psychological symptoms of dementia: A best practice guide for health and social care  
34 professionals. 2017. Available:[https://www.alzheimers.org.uk/sites/default/files/2018-](https://www.alzheimers.org.uk/sites/default/files/2018-08/Optimising%20treatment%20and%20care%20-%20best%20practice%20guide.pdf?downloadID=609)  
35 [08/Optimising%20treatment%20and%20care%20-](https://www.alzheimers.org.uk/sites/default/files/2018-08/Optimising%20treatment%20and%20care%20-%20best%20practice%20guide.pdf?downloadID=609)  
36 [%20best%20practice%20guide.pdf?downloadID=609](https://www.alzheimers.org.uk/sites/default/files/2018-08/Optimising%20treatment%20and%20care%20-%20best%20practice%20guide.pdf?downloadID=609) [Accessed 10 October 2022].  
37  
38  
39  
40  
41  
42  
43 [16] National Institute for Health and Care Excellence. Dementia: Assessment,  
44 management and support for people living with dementia and their carers. 2018.  
45 Available:[https://www.nice.org.uk/guidance/ng97/chapter/Recommendations#managi](https://www.nice.org.uk/guidance/ng97/chapter/Recommendations#managing-non-cognitive-symptoms)  
46 [ng-non-cognitive-symptoms](https://www.nice.org.uk/guidance/ng97/chapter/Recommendations#managing-non-cognitive-symptoms) [Accessed 15 October 2022].  
47  
48  
49  
50  
51  
52 [17] Douglas S, James I, Ballard C. Non-pharmacological interventions in dementia. *Adv*  
53 *Psychiatr Treat* 2004;10:171-7.  
54  
55  
56  
57  
58  
59  
60

- 1  
2  
3  
4 [18] Growdon ME, Gan S, Yaffe K, et al. Polypharmacy among older adults with dementia  
5 compared with those without dementia in the United States. *J Am Geriatr Soc*  
6  
7 2021;69:2464-75.  
8  
9  
10  
11 [19] Rodrigues MC, Oliveira C. Drug-drug interactions and adverse drug reactions in  
12 polypharmacy among older adults: An integrative review. *Rev Lat Am Enfermagem*  
13  
14 2016;24:e2800.  
15  
16  
17 [20] Demurtas J, Schoene D, Torbahn G, et al. Physical activity and exercise in mild  
18 cognitive impairment and dementia: An umbrella review of intervention and  
19  
20 observational studies. *J Am Med Dir Assoc* 2020;21:1415-22.e6.  
21  
22  
23 [21] Dyer SM, Harrison SL, Laver K, et al. An overview of systematic reviews of  
24 pharmacological and non-pharmacological interventions for the treatment of  
25  
26 behavioral and psychological symptoms of dementia. *Int Psychogeriatr* 2018;30:295-  
27  
28 309.  
29  
30  
31 [22] Koch J, Amos JG, Beattie E, et al. Non-pharmacological interventions for  
32 neuropsychiatric symptoms of dementia in residential aged care settings: An umbrella  
33  
34 review. *Int J Nurs Stud* 2022;128:104187.  
35  
36  
37 [23] Legere LE, McNeill S, Schindel Martin L, et al. Nonpharmacological approaches for  
38 behavioural and psychological symptoms of dementia in older adults: A systematic  
39  
40 review of reviews. *J Clin Nurs* 2018;27:e1360-e76.  
41  
42  
43 [24] Abraha I, Rimland JM, Trotta FM, et al. Systematic review of systematic reviews of  
44 non-pharmacological interventions to treat behavioural disturbances in older patients  
45  
46 with dementia. The SENATOR-OnTop series. *BMJ Open* 2017;7:e012759.  
47  
48  
49 [25] Kishita N, Backhouse T, Mioshi E. Nonpharmacological Interventions to Improve  
50 depression, anxiety, and quality of life (QoL) in people with dementia: An overview  
51  
52 of systematic reviews. *J Geriatr Psychiatry Neurol* 2020;33:28-41.  
53  
54  
55  
56  
57  
58  
59  
60



- 1  
2  
3  
4 [26] James IA, Gray K, Moniz-Cook E, et al. Behavioural and psychological symptoms of  
5 dementia: A new framework for holistic understanding and non-pharmacological  
6 management. *BJPsych Advances* 2022;28:11-20.  
7  
8  
9  
10  
11 [27] Kolanowski A, Boltz M, Galik E, et al. Determinants of behavioral and psychological  
12 symptoms of dementia: A scoping review of the evidence. *Nurs Outlook*  
13 2017;65:515-29.  
14  
15  
16  
17 [28] Pollock M, Fernandes R, Becker L, et al. Chapter V: Overviews of Reviews. In:  
18 Higgins JPT, Thomas J, Chandler J, Cumpston M, Li T, Page MJ, Welch VA  
19 (editors). *Cochrane Handbook for Systematic Reviews of Interventions version 6.3*  
20 (updated February 2022). Cochrane, 2022.  
21  
22  
23  
24  
25  
26  
27 [29] Smith V, Devane D, Begley CM, et al. Methodology in conducting a systematic  
28 review of systematic reviews of healthcare interventions. *BMC Med Res Methodol*  
29 2011;11:15.  
30  
31  
32  
33  
34 [30] Shea BJ, Reeves BC, Wells G, et al. AMSTAR 2: A critical appraisal tool for  
35 systematic reviews that include randomised or non-randomised studies of healthcare  
36 interventions, or both. *BMJ* 2017;358:j4008.  
37  
38  
39  
40  
41 [31] Pieper D, Antoine SL, Mathes T, et al. Systematic review finds overlapping reviews  
42 were not mentioned in every other overview. *J Clin Epidemiol* 2014;67:368-75.  
43  
44  
45  
46 [32] Pollock M, Fernandes RM, Newton AS, et al. A decision tool to help researchers  
47 make decisions about including systematic reviews in overviews of reviews of  
48 healthcare interventions. *Syst Rev* 2019;8:29.  
49  
50  
51  
52  
53  
54  
55  
56  
57  
58  
59  
60

**Table 1.** Inclusion and Exclusion Criteria

|              | Inclusion                                                                                                                                                                                                                         | Exclusion                                                                                                                                                                                                                                                                                                                                                                                                                                     |
|--------------|-----------------------------------------------------------------------------------------------------------------------------------------------------------------------------------------------------------------------------------|-----------------------------------------------------------------------------------------------------------------------------------------------------------------------------------------------------------------------------------------------------------------------------------------------------------------------------------------------------------------------------------------------------------------------------------------------|
| Population   | <ul style="list-style-type: none"> <li>Systematic reviews or meta-analyses that include persons living with dementia</li> </ul>                                                                                                   | <ul style="list-style-type: none"> <li>Systematic reviews or meta-analyses that do not include persons living with dementia</li> <li>Systematic reviews or meta-analyses in which target groups other than dementia are mixed (e.g., cognitively normal and mild cognitive impairment groups)</li> </ul>                                                                                                                                      |
| Intervention | <ul style="list-style-type: none"> <li>Systematic reviews or meta-analyses that include at least one non-pharmacological intervention</li> </ul>                                                                                  | <ul style="list-style-type: none"> <li>Systematic reviews or meta-analyses that include pharmacological interventions (e.g., drugs), a therapeutic intervention that needs a prescription (e.g., brain stimulation), or supplements (e.g., herbal medicine, cannabinoids)</li> <li>Systematic reviews or meta-analyses that include interventions for informal/formal caregivers or staff (e.g., dyadic, educational intervention)</li> </ul> |
| Control      | <ul style="list-style-type: none"> <li>Systematic reviews or meta-analyses that include usual care, waitlist control, or other types of non-pharmacological interventions</li> </ul>                                              | <ul style="list-style-type: none"> <li>Systematic reviews or meta-analyses that include a control group receiving pharmacological interventions</li> </ul>                                                                                                                                                                                                                                                                                    |
| Outcome      | <ul style="list-style-type: none"> <li>Systematic reviews or meta-analyses that include one or more BPSD symptoms (e.g., agitation) measured using valid measurement tools (e.g., Cohen-Mansfield Agitation Inventory)</li> </ul> | <ul style="list-style-type: none"> <li>Systematic reviews or meta-analyses that do not include BPSD outcomes</li> </ul>                                                                                                                                                                                                                                                                                                                       |
| Setting      | <ul style="list-style-type: none"> <li>Systematic reviews or meta-analyses that mostly include long-term care settings or community settings</li> </ul>                                                                           | <ul style="list-style-type: none"> <li>Systematic reviews or meta-analyses that only include acute or sub-acute settings</li> </ul>                                                                                                                                                                                                                                                                                                           |
| Design       | <ul style="list-style-type: none"> <li>Systematic review and meta-analyses that include randomized controlled trials as a primary study</li> </ul>                                                                                | <ul style="list-style-type: none"> <li>Original articles, qualitative reviews, narrative reviews, reviews of reviews, and non-peer-reviewed articles (e.g., editorials, clinical guidelines, and conference abstracts)</li> </ul>                                                                                                                                                                                                             |

*Note.* BPSD = Behavioral and Psychological Symptoms of Dementia.

1  
2  
3  
4 **SUPPLEMENTARY MATERIAL**  
5

6 **Table A1. Search Trail for PubMed**  
7

8

| Search # | MeSH Terms and Key Words                                                                                                                                                                                                                                                                                                                                                                                                                                                                                                                                                                                                                                                                                                                                                                                                                                                                                                                                                                                                                                                                                                                                                                                                                                                                                                                                                                                                                                                                                                                                                                                                                                                                                                                                                                                                                                                                                                                                                                                                                                                                                                                                                                                                                                                                                                                                                                                                                                                                                                                                                                                                                                                                                                                                                               |
|----------|----------------------------------------------------------------------------------------------------------------------------------------------------------------------------------------------------------------------------------------------------------------------------------------------------------------------------------------------------------------------------------------------------------------------------------------------------------------------------------------------------------------------------------------------------------------------------------------------------------------------------------------------------------------------------------------------------------------------------------------------------------------------------------------------------------------------------------------------------------------------------------------------------------------------------------------------------------------------------------------------------------------------------------------------------------------------------------------------------------------------------------------------------------------------------------------------------------------------------------------------------------------------------------------------------------------------------------------------------------------------------------------------------------------------------------------------------------------------------------------------------------------------------------------------------------------------------------------------------------------------------------------------------------------------------------------------------------------------------------------------------------------------------------------------------------------------------------------------------------------------------------------------------------------------------------------------------------------------------------------------------------------------------------------------------------------------------------------------------------------------------------------------------------------------------------------------------------------------------------------------------------------------------------------------------------------------------------------------------------------------------------------------------------------------------------------------------------------------------------------------------------------------------------------------------------------------------------------------------------------------------------------------------------------------------------------------------------------------------------------------------------------------------------------|
| #1       | "Aged"[MeSH Terms] OR "older adult"[All Fields] OR "older adults"[All Fields] OR "senior"[All Fields] OR "seniors"[All Fields] OR "Elderly"[All Fields] OR "elder"[All Fields] OR "Aged"[All Fields] OR "older people"[All Fields] OR "old person"[All Fields] OR "older patient"[All Fields] OR "older patients"[All Fields] OR "old age"[All Fields] OR "aging adult"[All Fields] OR "aging adults"[All Fields] OR "ageing adult"[All Fields] OR "ageing adults"[All Fields]                                                                                                                                                                                                                                                                                                                                                                                                                                                                                                                                                                                                                                                                                                                                                                                                                                                                                                                                                                                                                                                                                                                                                                                                                                                                                                                                                                                                                                                                                                                                                                                                                                                                                                                                                                                                                                                                                                                                                                                                                                                                                                                                                                                                                                                                                                         |
| #2       | "dementia"[MeSH Terms] OR "Lewy Body Disease"[MeSH Terms] OR "dementia"[All Fields] OR "Alzheimer Disease"[All Fields] OR "Alzheimer"[All Fields] OR "Alzheimer's"[All Fields] OR "Lewy"[All Fields] OR "Vascular dementia"[All Fields] OR "alcohol related dementia"[All Fields] OR "Parkinson's disease dementia"[All Fields] OR "Lewy Body Disease"[All Fields]                                                                                                                                                                                                                                                                                                                                                                                                                                                                                                                                                                                                                                                                                                                                                                                                                                                                                                                                                                                                                                                                                                                                                                                                                                                                                                                                                                                                                                                                                                                                                                                                                                                                                                                                                                                                                                                                                                                                                                                                                                                                                                                                                                                                                                                                                                                                                                                                                     |
| #3       | "Behavioral Disciplines and Activities"[MeSH Terms] OR "Behavior Therapy"[MeSH Terms] OR "Psychotherapy"[MeSH Terms] OR "Reality Therapy"[MeSH Terms] OR "Exercise"[MeSH Terms] OR "Massage"[MeSH Terms] OR "Aromatherapy"[MeSH Terms] OR "Animal Assisted Therapy"[MeSH Terms] OR "Horticultural Therapy"[MeSH Terms] OR "Art Therapy"[MeSH Terms] OR "Music Therapy"[MeSH Terms] OR "Occupational Therapy"[MeSH Terms] OR "Play Therapy"[MeSH Terms] OR "Recreation Therapy"[MeSH Terms] OR "Transcutaneous Electric Nerve Stimulation"[MeSH Terms] OR "meditation"[MeSH Terms] OR "mindfulness"[MeSH Terms] OR "Behavioral Disciplines and Activities"[All Fields] OR "Non pharmacological"[All Fields] OR "non drug"[All Fields] OR "behavioral"[All Fields] OR "Behavior Therapy"[All Fields] OR "psychosocial"[All Fields] OR "Psychodynamic therapy"[All Fields] OR "Psychotherapy"[All Fields] OR "Psychological treatment"[All Fields] OR "Cognitive Stimulation Therapy"[All Fields] OR "Cognitive Therapy"[All Fields] OR "cognitive training"[All Fields] OR "cognitive rehabilitation"[All Fields] OR "Reality Orientation"[All Fields] OR "Reminiscence"[All Fields] OR "Reminiscences"[All Fields] OR "autobiography"[All Fields] OR "life review"[All Fields] OR "storytelling"[All Fields] OR "oral history"[All Fields] OR "life history"[All Fields] OR "validation therapy"[All Fields] OR "Reality Therapy"[All Fields] OR "dementia care mapping"[All Fields] OR "Montessori based activities"[All Fields] OR "ability focused"[All Fields] OR "Exercise"[All Fields] OR "Physical"[All Fields] OR "muscle relaxation"[All Fields] OR "touch"[All Fields] OR "touch therapy"[All Fields] OR "Massage"[All Fields] OR "Multi component therapy"[All Fields] OR "Aromatherapy"[All Fields] OR "Animal Assisted Therapy"[All Fields] OR "doll therapy"[All Fields] OR "robot therapy"[All Fields] OR "pet robot"[All Fields] OR "Horticultural Therapy"[All Fields] OR "Art Therapy"[All Fields] OR "painting"[All Fields] OR "Spaced retrieval"[All Fields] OR "Music Therapy"[All Fields] OR "light therapy"[All Fields] OR "Occupational Therapy"[All Fields] OR "Play Therapy"[All Fields] OR "Recreation Therapy"[All Fields] OR "snoezelen"[All Fields] OR "multimodality therapy"[All Fields] OR "sensory"[All Fields] OR "sensory stimulation"[All Fields] OR "Transcutaneous Electric Nerve Stimulation"[All Fields] OR "TENS"[All Fields] OR "emotion oriented"[All Fields] OR "therapeutic conversation"[All Fields] OR "meditation"[All Fields] OR "mindfulness"[All Fields] OR "Special care"[All Fields] OR "Simulated presence therapy"[All Fields] OR "multisensorial"[All Fields] OR "multisensory"[All Fields] OR "brain stimulation"[All Fields] |
| #4       | "Behavioral Symptoms"[MeSH Terms] OR "Problem Behavior"[MeSH Terms] OR "Psychomotor Agitation"[MeSH Terms] OR "Irritable Mood"[MeSH Terms] OR                                                                                                                                                                                                                                                                                                                                                                                                                                                                                                                                                                                                                                                                                                                                                                                                                                                                                                                                                                                                                                                                                                                                                                                                                                                                                                                                                                                                                                                                                                                                                                                                                                                                                                                                                                                                                                                                                                                                                                                                                                                                                                                                                                                                                                                                                                                                                                                                                                                                                                                                                                                                                                          |

9  
10  
11  
12  
13  
14  
15  
16  
17  
18  
19  
20  
21  
22  
23  
24  
25  
26  
27  
28  
29  
30  
31  
32  
33  
34  
35  
36  
37  
38  
39  
40  
41  
42  
43  
44  
45  
46  
47  
48  
49  
50  
51  
52  
53  
54  
55  
56  
57  
58  
59  
60

"aggression"[MeSH Terms] OR "depressive disorder"[MeSH Terms] OR "depression"[MeSH Terms] OR "anxiety"[MeSH Terms] OR "delusions"[MeSH Terms] OR "hallucinations"[MeSH Terms] OR "Sleep Deprivation"[MeSH Terms] OR "apathy"[MeSH Terms] OR "Euphoria"[MeSH Terms] OR "Appetite"[MeSH Terms] OR "Behavioral Symptoms"[All Fields] OR "neuropsychic symptoms"[All Fields] OR "behavior"[All Fields] OR "behaviors"[All Fields] OR "behavior"[All Fields] OR "behaviours"[All Fields] OR "behavioral psychological symptoms"[All Fields] OR "behavioral and psychological symptoms"[All Fields] OR "behavioural and psychological symptoms"[All Fields] OR "BPSD"[All Fields] OR "BSD"[All Fields] OR "behavioral problems"[All Fields] OR "Problem Behavior"[All Fields] OR "repetitive behavior"[All Fields] OR "repetitive"[All Fields] OR "agitation"[All Fields] OR "pacing"[All Fields] OR "wander"[All Fields] OR "wanders"[All Fields] OR "wandering"[All Fields] OR "walking"[All Fields] OR "safe walking"[All Fields] OR "sundowning"[All Fields] OR "Night time behavior"[All Fields] OR "challenging behavior"[All Fields] OR "disruptive"[All Fields] OR "restless"[All Fields] OR "Psychomotor Agitation"[All Fields] OR "Irritability"[All Fields] OR "Irritable Mood"[All Fields] OR "Disinhibition"[All Fields] OR "aggression"[All Fields] OR "aggressive"[All Fields] OR "aberrant"[All Fields] OR "aberrant motor behavior"[All Fields] OR "social inappropriateness"[All Fields] OR "vocalization"[All Fields] OR "vocalisation"[All Fields] OR "psychomotor activity"[All Fields] OR "psychosis"[All Fields] OR "Psychotic Disorders"[All Fields] OR "psycho"[All Fields] OR "psycho social"[All Fields] OR "neuropsychiatric symptom"[All Fields] OR "depression"[All Fields] OR "depressive"[All Fields] OR "depressive disorder"[All Fields] OR "mood disturbance"[All Fields] OR "anxiety"[All Fields] OR "delusions"[All Fields] OR "depressive disorder"[All Fields] OR "hallucination"[All Fields] OR "Sleep disturbance"[All Fields] OR "Sleep disorders"[All Fields] OR "Sleeping disorders"[All Fields] OR "Sleep Deprivation"[All Fields] OR "apathy"[All Fields] OR "Indifference"[All Fields] OR "dysphoria"[All Fields] OR "Euphoria"[All Fields] OR "Elation"[All Fields] OR "Appetite"[All Fields] OR "Eating change"[All Fields] OR "personality change"[All Fields] OR "behavioural"[All Fields] OR "neuropsychiatric"[All Fields]—

#5 "Systematic Review"[Publication Type] OR "meta-analysis"[Publication Type] OR "Systematic Review"[All Fields] OR "meta-analysis"[All Fields] OR "Systematic Review"[Title/Abstract] OR "meta-analysis"[Title/Abstract]

#6 #1 AND #2 AND #3 AND #4 AND #5

#7 #6 AND Applied limits (publication year ≤ 10 years)

Table A2. Search Trail for CINAHL

| Search # | Subject Headings (MH) and Key Words                                                                                                                                                                                                                                                                                                                                                                                                                                                                                                                                                                                                                                                                                                                                                                                                                                                                                                                                                                                                                                                                                                                                                                                                                                                                                                                                                                                                                                                                                                                                                                                                                                                                                                                                                                                                      |
|----------|------------------------------------------------------------------------------------------------------------------------------------------------------------------------------------------------------------------------------------------------------------------------------------------------------------------------------------------------------------------------------------------------------------------------------------------------------------------------------------------------------------------------------------------------------------------------------------------------------------------------------------------------------------------------------------------------------------------------------------------------------------------------------------------------------------------------------------------------------------------------------------------------------------------------------------------------------------------------------------------------------------------------------------------------------------------------------------------------------------------------------------------------------------------------------------------------------------------------------------------------------------------------------------------------------------------------------------------------------------------------------------------------------------------------------------------------------------------------------------------------------------------------------------------------------------------------------------------------------------------------------------------------------------------------------------------------------------------------------------------------------------------------------------------------------------------------------------------|
| #1       | (MH "Aged") OR "older adults" OR "seniors" OR "Elderly" OR "elder" OR "Aged" OR "older adult" OR "senior" OR "older people" OR "old person" OR "older patient" OR "older patients" OR "old age" OR "aging adult" OR "aging adults" OR "ageing adult" OR "ageing adults"                                                                                                                                                                                                                                                                                                                                                                                                                                                                                                                                                                                                                                                                                                                                                                                                                                                                                                                                                                                                                                                                                                                                                                                                                                                                                                                                                                                                                                                                                                                                                                  |
| #2       | (MH "Dementia") OR (MH "Alzheimer's Disease") OR (MH "Lewy Body Disease") OR "dementia" OR "Alzheimer Disease" OR "Alzheimer" OR "Alzheimer's" OR "Lewy" OR "Vascular dementia" OR "alcohol related dementia" OR "Parkinson's disease dementia" OR "Lewy Body Disease"                                                                                                                                                                                                                                                                                                                                                                                                                                                                                                                                                                                                                                                                                                                                                                                                                                                                                                                                                                                                                                                                                                                                                                                                                                                                                                                                                                                                                                                                                                                                                                   |
| #3       | (MH "Cognitive Therapy") OR (MH "Behavior Therapy") OR (MH "Psychotherapy") OR (MH "Reality Therapy") OR (MH "Exercise") OR (MH "Massage") OR (MH "Aromatherapy") OR (MH "Animal Assisted Therapy") OR (MH "Art Therapy") OR (MH "Music Therapy") OR (MH "Occupational Therapy") OR (MH "Play Therapy") OR (MH "Recreational Therapy") OR (MH "Transcutaneous Electric Nerve Stimulation") OR (MH "meditation") OR (MH "mindfulness") OR "Behavioral Disciplines and Activities" OR "Non pharmacological" OR "non drug" OR "behavioral" OR "Behavior Therapy" OR "psychosocial" OR "Psychodynamic therapy" OR "Psychotherapy" OR "Psychological treatment" OR "Cognitive Stimulation Therapy" OR "Cognitive Therapy" OR "cognitive training" OR "cognitive rehabilitation" OR "Reality Orientation" OR "Reminiscence" OR "Reminiscences" OR "autobiography" OR "life review" OR "storytelling" OR "oral history" OR "life history" OR "validation therapy" OR "Reality Therapy" OR "dementia care mapping" OR "Montessori based activities" OR "ability focused" OR "Exercise" OR "Physical" OR "muscle relaxation" OR "touch" OR "touch therapy" OR "Massage" OR "Multi component therapy" OR "Aromatherapy" OR "Animal Assisted Therapy" OR "doll therapy" OR "robot therapy" OR "Horticultural Therapy" OR "Art Therapy" OR "painting" OR "Spaced retrieval" OR "Music Therapy" OR "light therapy" OR "Occupational Therapy" OR "Play Therapy" OR "Recreation Therapy" OR "snoezelen" OR "multimodality therapy" OR "sensory" OR "sensory stimulation" OR "Transcutaneous Electric Nerve Stimulation" OR "TENS" OR "emotion oriented" OR "therapeutic conversation" OR "meditation" OR "mindfulness" OR "Special care" OR "pet robot" OR " Simulated presence therapy" OR " multisensorial" OR " multisensory" OR "brain stimulation" |
| #4       | (MH "Behavioral Symptoms") OR (MH "aggression") OR (MH "Psychotic Disorders") OR (MH "depression") OR (MH "delusions") OR (MH "anxiety") OR (MH "hallucinations") OR (MH "Sleep Deprivation") OR (MH "apathy") OR (MH "Appetite") OR "Behavioral Symptoms" OR "neuropsychic symptoms" OR "behavior" OR "behaviors" OR "behaviour" OR "behaviours" OR "behavioral psychological symptoms" OR "behavioral and psychological symptoms" OR "behavioural and psychological symptoms" OR "BPSD" OR "BSD" OR "behavioral problems" OR "Problem Behavior" OR "repetitive behavior" OR "repetitive" OR "agitation" OR "pacing" OR "wander" OR "wanders" OR "wandering" OR "walking" OR "safe walking" OR "sundowning" OR "Night time behavior" OR "challenging behavior" OR "disruptive" OR "restless" OR "Psychomotor Agitation" OR "Irritability" OR "Irritable Mood" OR "Disinhibition" OR "aggression" OR "aggressive" OR "aberrant" OR "aberrant motor behavior" OR "social inappropriateness" OR "vocalization" OR "vocalisation" OR "psychomotor activity" OR "psychosis" OR "Psychotic Disorders" OR "psycho" OR "psycho social" OR "neuropsychiatric symptom" OR "depression" OR "depressive" OR "depressive disorder" OR "mood disturbance" OR "anxiety" OR "delusions" OR "depressive disorder" OR "hallucination" OR "Sleep disturbance" OR "Sleep disorders" OR "Sleeping disorders" OR "Sleep Deprivation" OR "apathy" OR "Indifference" OR "dysphoria" OR "Euphoria" OR "Elation" OR "Appetite" OR                                                                                                                                                                                                                                                                                                                                 |

|    |                                                                                                                                                                                            |
|----|--------------------------------------------------------------------------------------------------------------------------------------------------------------------------------------------|
|    | "Eating change" OR "personality change" OR "behavioural" OR "neuropsychiatric" OR "mood"                                                                                                   |
| #5 | (MH "Systematic Review") OR (MH "Meta Analysis") OR TI "systematic review" OR AB "systematic review" OR TI "meta-analysis" OR AB "meta-analysis" OR "systematic review" OR "meta-analysis" |
| #6 | S1 AND S2 AND S3 AND S4 AND S5                                                                                                                                                             |
| #7 | S6 AND [Applied filters] Published Date: 2012-2022                                                                                                                                         |

For peer review only

**Table A3. Search Trail for PsycINFO**

| <b>Search #</b> | <b>Main Subjects and Key Words</b>                                                                                                                                                                                                                                                                                                                                                                                                                                                                                                                                                                                                                                                                                                                                                                                                                                                                                                                                                                                                                                                                                                                                                                                                                                                                                                                                                                                                                                                                                                                                                                                                                                                                                                                                                                                                                                                                                                                                                                                                                                                                                            |
|-----------------|-------------------------------------------------------------------------------------------------------------------------------------------------------------------------------------------------------------------------------------------------------------------------------------------------------------------------------------------------------------------------------------------------------------------------------------------------------------------------------------------------------------------------------------------------------------------------------------------------------------------------------------------------------------------------------------------------------------------------------------------------------------------------------------------------------------------------------------------------------------------------------------------------------------------------------------------------------------------------------------------------------------------------------------------------------------------------------------------------------------------------------------------------------------------------------------------------------------------------------------------------------------------------------------------------------------------------------------------------------------------------------------------------------------------------------------------------------------------------------------------------------------------------------------------------------------------------------------------------------------------------------------------------------------------------------------------------------------------------------------------------------------------------------------------------------------------------------------------------------------------------------------------------------------------------------------------------------------------------------------------------------------------------------------------------------------------------------------------------------------------------------|
| #1              | MAINSUBJECT.EXACT("Aged") OR "older adults" OR "seniors" OR "Elderly" OR "elder" OR "Aged" OR "older adult" OR "senior" OR "older people" OR "old person" OR "older patient" OR "older patients" OR "old age" OR "aging adult" OR "aging adults" OR "ageing adult" OR "ageing adults"                                                                                                                                                                                                                                                                                                                                                                                                                                                                                                                                                                                                                                                                                                                                                                                                                                                                                                                                                                                                                                                                                                                                                                                                                                                                                                                                                                                                                                                                                                                                                                                                                                                                                                                                                                                                                                         |
| #2              | MAINSUBJECT.EXACT("DEMENTIA") OR MAINSUBJECT.EXACT("Alzheimer's Disease") OR MAINSUBJECT.EXACT("Lewy Body Disease") OR "dementia" OR "Alzheimer's Disease" OR "Alzheimer's" OR "Alzheimer" OR "Vascular dementia" OR "alcohol related dementia" OR "Parkinson's disease dementia" OR "Lewy" OR "Lewy Body Disease"                                                                                                                                                                                                                                                                                                                                                                                                                                                                                                                                                                                                                                                                                                                                                                                                                                                                                                                                                                                                                                                                                                                                                                                                                                                                                                                                                                                                                                                                                                                                                                                                                                                                                                                                                                                                            |
| #3              | MAINSUBJECT.EXACT("Cognitive Therapy") OR MAINSUBJECT.EXACT("Behavior Therapy") OR MAINSUBJECT.EXACT("Psychotherapy") OR MAINSUBJECT.EXACT("Reality Therapy") OR MAINSUBJECT.EXACT("Exercise") OR MAINSUBJECT.EXACT("Massage") OR MAINSUBJECT.EXACT("Aromatherapy") OR MAINSUBJECT.EXACT("Animal Assisted Therapy") OR MAINSUBJECT.EXACT("Horticultural Therapy") OR MAINSUBJECT.EXACT("Art Therapy") OR MAINSUBJECT.EXACT("Music Therapy") OR MAINSUBJECT.EXACT("Occupational Therapy") OR MAINSUBJECT.EXACT("Play Therapy") OR MAINSUBJECT.EXACT("Recreational Therapy") OR MAINSUBJECT.EXACT("Transcutaneous Electric Nerve Stimulation") OR MAINSUBJECT.EXACT("meditation") OR MAINSUBJECT.EXACT("mindfulness") OR "behavioral Disciplines and Activities" OR "Non pharmacological" OR "non drug" OR "behavioral" OR "Behavior Therapy" OR "psychosocial" OR "Psychodynamic therapy" OR "Psychotherapy" OR "Psychological treatment" OR "Cognitive Stimulation Therapy" OR "Cognitive Therapy" OR "cognitive training" OR "cognitive rehabilitation" OR "Reality Orientation" OR "Reminiscence" OR "Reminiscences" OR "RT" OR "autobiography" OR "life review" OR "storytelling" OR "oval history" OR "life history" OR "validation therapy" OR "Reality Therapy" OR "dementia care mapping" OR "Montessori based activities" OR "ability focused" OR "Exercise" OR "Physical" OR "muscle relaxation" OR "touch" OR "touch therapy" OR "Massage" OR "Multi component therapy" OR "Aromatherapy" OR "Animal Assisted Therapy" OR "doll therapy" OR "robot therapy" OR "Horticultural Therapy" OR "Art Therapy" OR "painting" OR "Spaced retrieval" OR "Music Therapy" OR "light therapy" OR "Occupational Therapy" OR "Play Therapy" OR "Recreation Therapy" OR "snoezelen" OR "multimodality therapy" OR "sensory" OR "sensory stimulation" OR "Transcutaneous Electric Nerve Stimulation" OR "TENS" OR "emotion oriented" OR "therapeutic conversation" OR "meditation" OR "mindfulness" OR "Special care" OR "pet robot" OR " Simulated presence therapy" OR "multisensorial" OR " multisensory" OR "brain stimulation" |
| #4              | MAINSUBJECT.EXACT("behavioral Symptoms") OR MAINSUBJECT.EXACT("apathy") OR MAINSUBJECT.EXACT("Sleep Deprivation") OR MAINSUBJECT.EXACT("aggression") OR MAINSUBJECT.EXACT("Psychomotor Agitation") OR MAINSUBJECT.EXACT("depression") OR MAINSUBJECT.EXACT("delusions") OR MAINSUBJECT.EXACT("anxiety") OR MAINSUBJECT.EXACT("hallucinations") OR MAINSUBJECT.EXACT("Appetite") OR MAINSUBJECT.EXACT("Psychotic Disorders") OR "behavioral Symptoms" OR "neuropsychic symptoms" OR "behavior" OR "behaviors" OR "behavior" OR "behaviours" OR "behavioral psychological symptoms" OR "behavioral and psychological symptoms" OR "behavioural and psychological symptoms" OR "BPSD"                                                                                                                                                                                                                                                                                                                                                                                                                                                                                                                                                                                                                                                                                                                                                                                                                                                                                                                                                                                                                                                                                                                                                                                                                                                                                                                                                                                                                                            |

|    |                                                                                                                                                                                                                                                                                                                                                                                                                                                                                                                                                                                                                                                                                                                                                                                                                                                                                                                                                                                                                                                                                                         |
|----|---------------------------------------------------------------------------------------------------------------------------------------------------------------------------------------------------------------------------------------------------------------------------------------------------------------------------------------------------------------------------------------------------------------------------------------------------------------------------------------------------------------------------------------------------------------------------------------------------------------------------------------------------------------------------------------------------------------------------------------------------------------------------------------------------------------------------------------------------------------------------------------------------------------------------------------------------------------------------------------------------------------------------------------------------------------------------------------------------------|
|    | OR "BSD" OR "behavioral problems" OR "Problem Behavior" OR "repetitive behavior" OR "repetitive" OR "agitation" OR "pacing" OR "wander" OR "wanders" OR "wandering" OR "walking" OR "safe walking" OR "sundowning" OR "Night time behavior" OR "challenging behavior" OR "disruptive" OR "restless" OR "Psychomotor Agitation" OR "Irritability" OR "Irritable Mood" OR "Disinhibition" OR "aggression" OR "aggressive" OR "aberrant" OR "aberrant motor behavior" OR "social inappropriateness" OR "vocalization" OR "vocalization" OR "psychomotor activity" OR "psychosis" OR "Psychotic Disorders" OR "psycho" OR "psycho social" OR "neuropsychiatric symptom" OR "depression" OR "depressive" OR "depressive disorder" OR "mood disturbance" OR "anxiety" OR "delusions" OR "depressive disorder" OR "hallucination" OR "Sleep disturbance" OR "Sleep disorders" OR "Sleeping disorders" OR "Sleep Deprivation" OR "apathy" OR "Indifference" OR "dysphoria" OR "Euphoria" OR "Elation" OR "Appetite" OR "Eating change" OR "personality change" OR "behavioural" OR "neuropsychiatric" OR "mood" |
| #5 | MAINSUBJECT.EXACT("systematic review") OR MAINSUBJECT.EXACT("meta analysis") OR tiab("systematic review") OR tiab("meta-analysis") OR "systematic review" OR "meta-analysis"                                                                                                                                                                                                                                                                                                                                                                                                                                                                                                                                                                                                                                                                                                                                                                                                                                                                                                                            |
| #6 | S1 AND S2 AND S3 AND S4 AND S5                                                                                                                                                                                                                                                                                                                                                                                                                                                                                                                                                                                                                                                                                                                                                                                                                                                                                                                                                                                                                                                                          |
| #7 | S7 AND [Applied filters] Published Date: 2012-2022                                                                                                                                                                                                                                                                                                                                                                                                                                                                                                                                                                                                                                                                                                                                                                                                                                                                                                                                                                                                                                                      |



**Table A4. Search Trail for Embase**

| Search # | MeSH Terms and Key Words                                                                                                                                                                                                                                                                                                                                                                                                                                                                                                                                                                                                                                                                                                                                                                                                                                                                                                                                                                                                                                                                                                                                                                                                                                                                                                                                                                                                                                                                                                                                                                                                                         |
|----------|--------------------------------------------------------------------------------------------------------------------------------------------------------------------------------------------------------------------------------------------------------------------------------------------------------------------------------------------------------------------------------------------------------------------------------------------------------------------------------------------------------------------------------------------------------------------------------------------------------------------------------------------------------------------------------------------------------------------------------------------------------------------------------------------------------------------------------------------------------------------------------------------------------------------------------------------------------------------------------------------------------------------------------------------------------------------------------------------------------------------------------------------------------------------------------------------------------------------------------------------------------------------------------------------------------------------------------------------------------------------------------------------------------------------------------------------------------------------------------------------------------------------------------------------------------------------------------------------------------------------------------------------------|
| #1       | 'aged'/exp OR 'older adults' OR senior OR seniors OR Elderly OR elder OR Aged OR 'older adult' OR 'older people' OR 'old person' OR 'older patient' OR 'older patients' OR 'old age' OR 'aging adult' OR 'aging adults' OR 'ageing adult' OR 'ageing adults'                                                                                                                                                                                                                                                                                                                                                                                                                                                                                                                                                                                                                                                                                                                                                                                                                                                                                                                                                                                                                                                                                                                                                                                                                                                                                                                                                                                     |
| #2       | 'dementia'/exp OR dementia OR 'Alzheimer disease' OR Alzheimer OR Alzheimers OR Lewy OR 'vascular dementia' OR 'alcohol related dementia' OR 'Parkinsons disease dementia' OR 'Lewy body disease'                                                                                                                                                                                                                                                                                                                                                                                                                                                                                                                                                                                                                                                                                                                                                                                                                                                                                                                                                                                                                                                                                                                                                                                                                                                                                                                                                                                                                                                |
| #3       | 'Psychotherapy'/exp OR 'Exercise'/exp OR 'Massage'/exp OR 'Aromatherapy'/exp OR 'Animal Assisted Therapy'/exp OR 'Horticultural Therapy'/exp OR 'Occupational Therapy'/exp OR 'recreational therapy'/exp OR 'Transcutaneous Electric Nerve Stimulation'/exp OR 'meditation'/exp OR 'Behavioral symptoms' OR Activities OR 'Non pharmacological' OR 'non drug' OR behavioral OR 'Behavior Therapy' OR psychosocial OR 'Psycho dynamic therapy' OR Psychotherapy OR 'Psychological treatment' OR 'Cognitive Stimulation Therapy' OR 'Cognitive Therapy' OR 'cognitive training' OR 'cognitive rehabilitation' OR 'Reality Orientation' OR Reminiscence OR Reminiscences OR RT OR autobiography OR 'life review' OR storytelling OR 'oral history' OR 'life history' OR 'validation therapy' OR 'Reality Therapy' OR 'Dementia Care Mapping' OR 'Montessori Based Activities' OR 'ability focused' OR Exercise OR Physical OR 'muscle relaxation' OR Touch OR 'touch therapy' OR Massage OR 'Multi component therapy' OR Aromatherapy OR 'Animal Assisted Therapy' OR 'doll therapy' OR 'robot therapy' OR 'Horticultural Therapy' OR 'Art Therapy' OR painting OR 'Spaced retrieval' OR 'Music Therapy' OR 'light therapy' OR 'Occupational Therapy' OR 'Play Therapy' OR 'recreational Therapy' OR snoezelen OR 'multimodality therapy' OR sensory OR 'sensory stimulation' OR 'Transcutaneous Electric Nerve Stimulation' OR TENS OR 'emotion oriented' OR 'therapeutic conversation' OR Meditation OR mindfulness OR 'Special care' OR 'pet robot' OR 'Simulated presence therapy' OR 'multisensorial' OR 'multisensory' OR 'brain stimulation' |
| #4       | 'behavior disorder'/exp OR 'irritability'/exp OR 'aggression'/exp OR 'depression'/exp OR 'anxiety'/exp OR 'delusion'/exp OR 'hallucination'/exp OR 'Sleep Deprivation'/exp OR 'apathy'/exp OR 'Euphoria'/exp OR 'Appetite'/exp OR 'behavior change'/exp OR 'restlessness'/exp OR 'Behavioral Symptoms' OR 'neuropsychic symptoms' OR behavior OR behaviors OR behavior OR behaviours OR 'behavioral psychological symptoms' OR 'behavioral and psychological symptoms' OR 'behavioural and psychological symptoms' OR BPSD OR BSD OR 'behavioral problems' OR 'Problem Behavior' OR 'repetitive behavior' OR repetitive OR agitation OR pacing OR wander OR wanders OR wandering OR walking OR 'safe walking' OR sundowning OR 'Night time behavior' OR 'challenging behavior' OR disruptive OR restless OR 'Psychomotor Agitation' OR Irritability OR 'Irritable Mood' OR Disinhibition OR aggression OR aggressive OR aberrant OR 'aberrant motor behavior' OR 'social inappropriateness' OR vocalization OR vocalisation OR 'psychomotor activity' OR psychosis OR 'Psychotic Disorders' OR psycho OR psycho social OR 'neuropsychiatric symptom' OR depression OR depressive OR 'depressive disorder' OR 'mood disturbance' OR anxiety OR delusions OR 'depressive disorder' OR hallucination OR 'Sleep disturbance' OR 'Sleep disorders' OR 'Sleeping disorders' OR 'Sleep Deprivation' OR apathy OR Indifference OR dysphoria OR Euphoria OR Elation OR Appetite OR 'Eating change' OR 'personality change' OR 'behavioural' OR 'neuropsychiatric'                                                                                         |
| #5       | 'systematic review'/exp OR 'meta analysis'/exp OR 'systematic review':ti OR 'meta analysis':ti OR 'systematic review':ab OR 'meta analysis':ab OR 'systematic review' OR 'meta analysis'                                                                                                                                                                                                                                                                                                                                                                                                                                                                                                                                                                                                                                                                                                                                                                                                                                                                                                                                                                                                                                                                                                                                                                                                                                                                                                                                                                                                                                                         |
| #6       | #1 AND #2 AND #3 AND #4 AND #5                                                                                                                                                                                                                                                                                                                                                                                                                                                                                                                                                                                                                                                                                                                                                                                                                                                                                                                                                                                                                                                                                                                                                                                                                                                                                                                                                                                                                                                                                                                                                                                                                   |

1  
2  
3  
4  
5 #7 #6 AND (2012:py OR 2013:py OR 2014:py OR 2015:py OR 2016:py OR 2017:py OR  
6 2018:py OR 2019:py OR 2020:py OR 2021:py OR 2022:py)  
7  
8  
9  
10  
11  
12  
13  
14  
15  
16  
17  
18  
19  
20  
21  
22  
23  
24  
25  
26  
27  
28  
29  
30  
31  
32  
33  
34  
35  
36  
37  
38  
39  
40  
41  
42  
43  
44  
45  
46  
47  
48  
49  
50  
51  
52  
53  
54  
55  
56  
57  
58  
59  
60

---

For peer review only

**Table A5. Search Trail for Cochrane**

| Search # | MeSH Terms and Key Words                                                                                                                                                                                                                                                                                                                                                                                                                                                                                                                                                                                                                                                                                                                                                                                                                                                                                                                                                                                                                                                                                                                                                                                                                                                                                                                                                                                                                                                                                                                                                                                                                                                                                                                                                                                                                                                                                                                                                                                                                                                                                                                                                                                                                                                                        |
|----------|-------------------------------------------------------------------------------------------------------------------------------------------------------------------------------------------------------------------------------------------------------------------------------------------------------------------------------------------------------------------------------------------------------------------------------------------------------------------------------------------------------------------------------------------------------------------------------------------------------------------------------------------------------------------------------------------------------------------------------------------------------------------------------------------------------------------------------------------------------------------------------------------------------------------------------------------------------------------------------------------------------------------------------------------------------------------------------------------------------------------------------------------------------------------------------------------------------------------------------------------------------------------------------------------------------------------------------------------------------------------------------------------------------------------------------------------------------------------------------------------------------------------------------------------------------------------------------------------------------------------------------------------------------------------------------------------------------------------------------------------------------------------------------------------------------------------------------------------------------------------------------------------------------------------------------------------------------------------------------------------------------------------------------------------------------------------------------------------------------------------------------------------------------------------------------------------------------------------------------------------------------------------------------------------------|
| #1       | MeSH descriptor: [Aged] explode all trees OR older adults OR seniors OR Elderly OR elder OR Aged OR older people OR old person OR older patient OR older patients OR old age OR aging adult OR aging adults OR ageing adult OR ageing adults                                                                                                                                                                                                                                                                                                                                                                                                                                                                                                                                                                                                                                                                                                                                                                                                                                                                                                                                                                                                                                                                                                                                                                                                                                                                                                                                                                                                                                                                                                                                                                                                                                                                                                                                                                                                                                                                                                                                                                                                                                                    |
| #2       | MeSH descriptor: [Dementia] explode all trees OR MeSH descriptor: [Lewy Body Disease] explode all trees OR dementia OR Alzheimer Disease OR Alzheimer OR Alzheimer's OR Lewy OR Vascular dementia OR alcohol related dementia OR Parkinson's disease dementia OR Lewy Body Disease                                                                                                                                                                                                                                                                                                                                                                                                                                                                                                                                                                                                                                                                                                                                                                                                                                                                                                                                                                                                                                                                                                                                                                                                                                                                                                                                                                                                                                                                                                                                                                                                                                                                                                                                                                                                                                                                                                                                                                                                              |
| #3       | MeSH descriptor: [Behavioral Disciplines and Activities] explode all trees OR MeSH descriptor: [Behavior Therapy] explode all trees OR MeSH descriptor: [Psychotherapy] explode all trees OR MeSH descriptor: [Reality Therapy] explode all trees OR MeSH descriptor: [Exercise] explode all trees OR MeSH descriptor: [Massage] explode all trees OR MeSH descriptor: [Aromatherapy] explode all trees OR MeSH descriptor: [Animal Assisted Therapy] explode all trees OR MeSH descriptor: [Horticultural Therapy] explode all trees OR MeSH descriptor: [Art Therapy] explode all trees OR MeSH descriptor: [Music Therapy] explode all trees OR MeSH descriptor: [Occupational Therapy] explode all trees OR MeSH descriptor: [Play Therapy] explode all trees OR MeSH descriptor: [Recreation Therapy] explode all trees OR MeSH descriptor: [Transcutaneous Electric Nerve Stimulation] explode all trees OR MeSH descriptor: [Meditation] explode all trees OR MeSH descriptor: [Mindfulness] explode all trees OR Behavioral Disciplines and Activities OR Non pharmacological OR non drug OR behavioral OR Behavior Therapy OR psychosocial OR Psychodynamic therapy OR Psychotherapy OR Psychological treatment OR Cognitive Stimulation Therapy OR Cognitive Therapy OR cognitive training OR cognitive rehabilitation OR Reality Orientation OR Reminiscence OR Reminiscences OR RT OR autobiography OR life review OR storytelling OR oral history OR life history OR validation therapy OR Reality Therapy OR dementia care mapping OR Montessori based activities OR ability focused OR Exercise OR Physical OR muscle relaxation OR Touch OR touch therapy OR Massage OR Multi component therapy OR Aromatherapy OR Animal Assisted Therapy OR doll therapy OR robot therapy OR Horticultural Therapy OR Art Therapy OR painting OR Spaced retrieval OR Music Therapy OR light therapy OR Occupational Therapy OR Play Therapy OR Recreation Therapy OR snoezelen OR multimodality therapy OR sensory OR sensory stimulation OR Transcutaneous Electric Nerve Stimulation OR TENS OR emotion oriented OR therapeutic conversation OR Meditation OR mindfulness OR Special care OR pet robot OR simulated presence therapy OR multisensorial OR multisensory OR brain stimulation |
| #4       | MeSH descriptor: [Behavioral Symptoms] explode all trees OR MeSH descriptor: [Psychomotor Agitation] explode all trees OR MeSH descriptor: [Irritable Mood] explode all trees OR MeSH descriptor: [Depressive Disorder] explode all trees OR MeSH descriptor: [Anxiety] explode all trees OR MeSH descriptor: [Hallucinations] explode all trees OR MeSH descriptor: [Sleep Deprivation] explode all trees OR MeSH descriptor: [Apathy] explode all trees OR MeSH descriptor: [Euphoria] explode all trees OR Behavioral Symptoms OR neuropsychic symptoms OR behavior OR behaviors OR behavior OR behaviours OR behavioral psychological symptoms OR behavioral and psychological symptoms OR behavioural and psychological symptoms OR BPSD OR BSD OR behavioral problems OR Problem Behavior OR repetitive behavior OR repetitive OR agitation OR pacing OR wander OR wanders OR wandering OR walking OR safe walking OR sundowning OR Night time behavior OR challenging behavior OR disruptive OR restless OR Psychomotor Agitation OR Irritability OR Irritable Mood OR Disinhibition OR aggression OR aggressive OR aberrant OR aberrant motor behavior OR social inappropriateness OR vocalization OR vocalization OR                                                                                                                                                                                                                                                                                                                                                                                                                                                                                                                                                                                                                                                                                                                                                                                                                                                                                                                                                                                                                                                                   |

|    |                                                                                                                                                                                                                                                                                                                                                                                                                                                                                               |
|----|-----------------------------------------------------------------------------------------------------------------------------------------------------------------------------------------------------------------------------------------------------------------------------------------------------------------------------------------------------------------------------------------------------------------------------------------------------------------------------------------------|
|    | psychomotor activity OR psychosis OR Psychotic Disorders OR psycho OR psycho social OR neuropsychiatric symptom OR depression OR depressive OR depressive disorder OR mood disturbance OR anxiety OR delusions OR depressive disorder OR hallucination OR Sleep disturbance OR Sleep disorders OR Sleeping disorders OR Sleep Deprivation OR apathy OR Indifference OR dysphoria OR Euphoria OR Elation OR Appetite OR Eating change OR personality change OR behavioural OR neuropsychiatric |
| #5 | MeSH descriptor: [Systematic Review] explode all trees OR MeSH descriptor: [Meta-Analysis] explode all trees OR (systematic review):ti,ab,kw OR (meta analysis):ti,ab,kw OR (meta analysis) OR (systematic review)                                                                                                                                                                                                                                                                            |
| #6 | #1 AND #2 AND #3 AND #4 AND #5 AND #6                                                                                                                                                                                                                                                                                                                                                                                                                                                         |
| #7 | #7 AND (Limit: publication date from Jan 2012 to Mar 2022, limit in Cochrane Reviews)                                                                                                                                                                                                                                                                                                                                                                                                         |

# Reporting checklist for protocol of a systematic review and meta analysis.

|                     |                     | Reporting Item                                                                                                                            | Page Number |
|---------------------|---------------------|-------------------------------------------------------------------------------------------------------------------------------------------|-------------|
| <b>Title</b>        |                     |                                                                                                                                           |             |
| Identification      | <a href="#">#1a</a> | Identify the report as a protocol of a systematic review                                                                                  | p.1         |
| Update              | <a href="#">#1b</a> | If the protocol is for an update of a previous systematic review, identify as such                                                        | na          |
| <b>Registration</b> |                     |                                                                                                                                           |             |
|                     | <a href="#">#2</a>  | If registered, provide the name of the registry (such as PROSPERO) and registration number                                                | p.2         |
| <b>Authors</b>      |                     |                                                                                                                                           |             |
| Contact             | <a href="#">#3a</a> | Provide name, institutional affiliation, e-mail address of all protocol authors; provide physical mailing address of corresponding author | p.1         |
| Contribution        | <a href="#">#3b</a> | Describe contributions of protocol authors and identify the guarantor of the review                                                       | p.1<br>p.10 |
| <b>Amendments</b>   |                     |                                                                                                                                           |             |

|    |                      |                     |                                                          |         |
|----|----------------------|---------------------|----------------------------------------------------------|---------|
| 1  |                      | <a href="#">#4</a>  | If the protocol represents an amendment of a previously  | na      |
| 2  |                      |                     | completed or published protocol, identify as such and    |         |
| 3  |                      |                     | list changes; otherwise, state plan for documenting      |         |
| 4  |                      |                     | important protocol amendments                            |         |
| 5  |                      |                     |                                                          |         |
| 6  |                      |                     |                                                          |         |
| 7  |                      |                     |                                                          |         |
| 8  |                      |                     |                                                          |         |
| 9  |                      |                     |                                                          |         |
| 10 |                      |                     |                                                          |         |
| 11 | <b>Support</b>       |                     |                                                          |         |
| 12 |                      |                     |                                                          |         |
| 13 |                      |                     |                                                          |         |
| 14 | Sources              | <a href="#">#5a</a> | Indicate sources of financial or other support for the   | p.10-11 |
| 15 |                      |                     | review                                                   |         |
| 16 |                      |                     |                                                          |         |
| 17 |                      |                     |                                                          |         |
| 18 |                      |                     |                                                          |         |
| 19 | Sponsor              | <a href="#">#5b</a> | Provide name for the review funder and / or sponsor      | p.10-11 |
| 20 |                      |                     |                                                          |         |
| 21 |                      |                     |                                                          |         |
| 22 | Role of sponsor      | <a href="#">#5c</a> | Describe roles of funder(s), sponsor(s), and / or        | p.10-11 |
| 23 |                      |                     | institution(s), if any, in developing the protocol       |         |
| 24 | or funder            |                     |                                                          |         |
| 25 |                      |                     |                                                          |         |
| 26 |                      |                     |                                                          |         |
| 27 |                      |                     |                                                          |         |
| 28 | <b>Introduction</b>  |                     |                                                          |         |
| 29 |                      |                     |                                                          |         |
| 30 |                      |                     |                                                          |         |
| 31 | Rationale            | <a href="#">#6</a>  | Describe the rationale for the review in the context of  | p.4-5   |
| 32 |                      |                     | what is already known                                    |         |
| 33 |                      |                     |                                                          |         |
| 34 |                      |                     |                                                          |         |
| 35 |                      |                     |                                                          |         |
| 36 | Objectives           | <a href="#">#7</a>  | Provide an explicit statement of the question(s) the     | p.6-7   |
| 37 |                      |                     | review will address with reference to participants,      |         |
| 38 |                      |                     | interventions, comparators, and outcomes (PICO)          |         |
| 39 |                      |                     |                                                          |         |
| 40 |                      |                     |                                                          |         |
| 41 |                      |                     |                                                          |         |
| 42 |                      |                     |                                                          |         |
| 43 |                      |                     |                                                          |         |
| 44 | <b>Methods</b>       |                     |                                                          |         |
| 45 |                      |                     |                                                          |         |
| 46 |                      |                     |                                                          |         |
| 47 | Eligibility criteria | <a href="#">#8</a>  | Specify the study characteristics (such as PICO, study   | p.7-8   |
| 48 |                      |                     | design, setting, time frame) and report characteristics  |         |
| 49 |                      |                     | (such as years considered, language, publication status) |         |
| 50 |                      |                     | to be used as criteria for eligibility for the review    |         |
| 51 |                      |                     |                                                          |         |
| 52 |                      |                     |                                                          |         |
| 53 |                      |                     |                                                          |         |
| 54 |                      |                     |                                                          |         |
| 55 |                      |                     |                                                          |         |
| 56 |                      |                     |                                                          |         |
| 57 |                      |                     |                                                          |         |
| 58 |                      |                     |                                                          |         |
| 59 |                      |                     |                                                          |         |
| 60 |                      |                     |                                                          |         |

|    |                   |                      |                                                             |            |
|----|-------------------|----------------------|-------------------------------------------------------------|------------|
| 1  | Information       | <a href="#">#9</a>   | Describe all intended information sources (such as          | p.6        |
| 2  |                   |                      |                                                             |            |
| 3  | sources           |                      | electronic databases, contact with study authors, trial     |            |
| 4  |                   |                      | registers or other grey literature sources) with planned    |            |
| 5  |                   |                      | dates of coverage                                           |            |
| 6  |                   |                      |                                                             |            |
| 7  |                   |                      |                                                             |            |
| 8  |                   |                      |                                                             |            |
| 9  |                   |                      |                                                             |            |
| 10 |                   |                      |                                                             |            |
| 11 | Search strategy   | <a href="#">#10</a>  | Present draft of search strategy to be used for at least    | p.6-7      |
| 12 |                   |                      | one electronic database, including planned limits, such     |            |
| 13 |                   |                      | that it could be repeated                                   | supplement |
| 14 |                   |                      |                                                             |            |
| 15 |                   |                      |                                                             |            |
| 16 |                   |                      |                                                             |            |
| 17 |                   |                      |                                                             |            |
| 18 | Study records -   | <a href="#">#11a</a> | Describe the mechanism(s) that will be used to manage       | p.7        |
| 19 | data management   |                      | records and data throughout the review                      |            |
| 20 |                   |                      |                                                             |            |
| 21 |                   |                      |                                                             |            |
| 22 |                   |                      |                                                             |            |
| 23 |                   |                      |                                                             |            |
| 24 | Study records -   | <a href="#">#11b</a> | State the process that will be used for selecting studies   | p.7        |
| 25 | selection process |                      | (such as two independent reviewers) through each            |            |
| 26 |                   |                      | phase of the review (that is, screening, eligibility and    |            |
| 27 |                   |                      | inclusion in meta-analysis)                                 |            |
| 28 |                   |                      |                                                             |            |
| 29 |                   |                      |                                                             |            |
| 30 |                   |                      |                                                             |            |
| 31 |                   |                      |                                                             |            |
| 32 |                   |                      |                                                             |            |
| 33 |                   |                      |                                                             |            |
| 34 | Study records -   | <a href="#">#11c</a> | Describe planned method of extracting data from reports     | p.8        |
| 35 | data collection   |                      | (such as piloting forms, done independently, in             |            |
| 36 |                   |                      | duplicate), any processes for obtaining and confirming      |            |
| 37 | process           |                      | data from investigators                                     |            |
| 38 |                   |                      |                                                             |            |
| 39 |                   |                      |                                                             |            |
| 40 |                   |                      |                                                             |            |
| 41 |                   |                      |                                                             |            |
| 42 |                   |                      |                                                             |            |
| 43 |                   |                      |                                                             |            |
| 44 | Data items        | <a href="#">#12</a>  | List and define all variables for which data will be sought | p.8        |
| 45 |                   |                      | (such as PICO items, funding sources), any pre-planned      |            |
| 46 |                   |                      | data assumptions and simplifications                        |            |
| 47 |                   |                      |                                                             |            |
| 48 |                   |                      |                                                             |            |
| 49 |                   |                      |                                                             |            |
| 50 |                   |                      |                                                             |            |
| 51 | Outcomes and      | <a href="#">#13</a>  | List and define all outcomes for which data will be         | p.7        |
| 52 | prioritization    |                      | sought, including prioritization of main and additional     |            |
| 53 |                   |                      | outcomes, with rationale                                    |            |
| 54 |                   |                      |                                                             |            |
| 55 |                   |                      |                                                             |            |
| 56 |                   |                      |                                                             |            |
| 57 |                   |                      |                                                             |            |
| 58 |                   |                      |                                                             |            |
| 59 |                   |                      |                                                             |            |
| 60 |                   |                      |                                                             |            |

|    |                    |                      |                                                            |      |
|----|--------------------|----------------------|------------------------------------------------------------|------|
| 1  | Risk of bias in    | <a href="#">#14</a>  | Describe anticipated methods for assessing risk of bias    | p.8  |
| 2  |                    |                      |                                                            |      |
| 3  | individual studies |                      | of individual studies, including whether this will be done |      |
| 4  |                    |                      |                                                            |      |
| 5  |                    |                      | at the outcome or study level, or both; state how this     |      |
| 6  |                    |                      |                                                            |      |
| 7  |                    |                      | information will be used in data synthesis                 |      |
| 8  |                    |                      |                                                            |      |
| 9  |                    |                      |                                                            |      |
| 10 |                    |                      |                                                            |      |
| 11 | Data synthesis     | <a href="#">#15a</a> | Describe criteria under which study data will be           | p.9  |
| 12 |                    |                      |                                                            |      |
| 13 |                    |                      | quantitatively synthesised                                 |      |
| 14 |                    |                      |                                                            |      |
| 15 |                    |                      |                                                            |      |
| 16 | Data synthesis     | <a href="#">#15b</a> | If data are appropriate for quantitative synthesis,        | na   |
| 17 |                    |                      |                                                            |      |
| 18 |                    |                      | describe planned summary measures, methods of              |      |
| 19 |                    |                      |                                                            |      |
| 20 |                    |                      | handling data and methods of combining data from           |      |
| 21 |                    |                      |                                                            |      |
| 22 |                    |                      | studies, including any planned exploration of              |      |
| 23 |                    |                      |                                                            |      |
| 24 |                    |                      | consistency (such as I <sup>2</sup> , Kendall's $\tau$ )   |      |
| 25 |                    |                      |                                                            |      |
| 26 |                    |                      |                                                            |      |
| 27 |                    |                      |                                                            |      |
| 28 | Data synthesis     | <a href="#">#15c</a> | Describe any proposed additional analyses (such as         | na   |
| 29 |                    |                      |                                                            |      |
| 30 |                    |                      | sensitivity or subgroup analyses, meta-regression)         |      |
| 31 |                    |                      |                                                            |      |
| 32 |                    |                      |                                                            |      |
| 33 |                    |                      |                                                            |      |
| 34 | Data synthesis     | <a href="#">#15d</a> | If quantitative synthesis is not appropriate, describe the | p.9  |
| 35 |                    |                      |                                                            |      |
| 36 |                    |                      | type of summary planned                                    |      |
| 37 |                    |                      |                                                            |      |
| 38 |                    |                      |                                                            |      |
| 39 | Meta-bias(es)      | <a href="#">#16</a>  | Specify any planned assessment of meta-bias(es) (such      | p.9  |
| 40 |                    |                      |                                                            |      |
| 41 |                    |                      | as publication bias across studies, selective reporting    |      |
| 42 |                    |                      |                                                            |      |
| 43 |                    |                      | within studies)                                            |      |
| 44 |                    |                      |                                                            |      |
| 45 |                    |                      |                                                            |      |
| 46 |                    |                      |                                                            |      |
| 47 | Confidence in      | <a href="#">#17</a>  | Describe how the strength of the body of evidence will     | p.10 |
| 48 |                    |                      |                                                            |      |
| 49 | cumulative         |                      | be assessed (such as GRADE)                                |      |
| 50 |                    |                      |                                                            |      |
| 51 | evidence           |                      |                                                            |      |
| 52 |                    |                      |                                                            |      |
| 53 |                    |                      |                                                            |      |
| 54 |                    |                      |                                                            |      |

None The PRISMA-P elaboration and explanation paper is distributed under the terms of the Creative Commons Attribution License CC-BY. This checklist can be completed online using



1 <https://www.goodreports.org/>, a tool made by the [EQUATOR Network](#) in collaboration with

2  
3 [Penelope.ai](#)

4  
5  
6  
7  
8  
9 Moher D, Shamseer L, Clarke M, Ghersi D, Liberati A, Petticrew M, Shekelle P, Stewart LA. Preferred  
10 Reporting Items for Systematic Review and Meta-Analysis Protocols (PRISMA-P) 2015 statement.  
11 Syst Rev. 2015;4(1):1.  
12  
13  
14  
15  
16  
17  
18  
19  
20  
21  
22  
23  
24  
25  
26  
27  
28  
29  
30  
31  
32  
33  
34  
35  
36  
37  
38  
39  
40  
41  
42  
43  
44  
45  
46  
47  
48  
49  
50  
51  
52  
53  
54  
55  
56  
57  
58  
59  
60
