# Supplementary material for: Symptom-specific non-pharmacological interventions for behavioural and psychological symptoms of dementia: protocol of an umbrella review of systematic reviews of randomised controlled trials
Source: PubMed Central journal article supplement — BMJ Open. 2023 Feb 15;13(2):e070317. doi: 10.1136/bmjopen-2022-070317 (PMC9933668; doi:10.1136/bmjopen-2022-070317), 2023-02-15
Supplement: bmjopen-2022-070317supp001.pdf [file bmjopen-2022-070317supp001.pdf]

## SUPPLEMENTARY MATERIAL

Table A1. Search Trail for PubMed

| Search # | MeSH Terms and Key Words                                                                                                                                                                                                                                                                                                                                                                                                                                                                                                                                                                                                                                                                                                                                                                                                                                                                                                                                                                                                                                                                                                                                                                                                                                                                                                                                                                                                                                                                                                                                                                                                                                                                                                                                                                                                                                                                                                                                                                                                                                                                                                                                                                                                                                                                                                                                                                                                                                                                                                                                                                                                                                                                                                                                                               |
|----------|----------------------------------------------------------------------------------------------------------------------------------------------------------------------------------------------------------------------------------------------------------------------------------------------------------------------------------------------------------------------------------------------------------------------------------------------------------------------------------------------------------------------------------------------------------------------------------------------------------------------------------------------------------------------------------------------------------------------------------------------------------------------------------------------------------------------------------------------------------------------------------------------------------------------------------------------------------------------------------------------------------------------------------------------------------------------------------------------------------------------------------------------------------------------------------------------------------------------------------------------------------------------------------------------------------------------------------------------------------------------------------------------------------------------------------------------------------------------------------------------------------------------------------------------------------------------------------------------------------------------------------------------------------------------------------------------------------------------------------------------------------------------------------------------------------------------------------------------------------------------------------------------------------------------------------------------------------------------------------------------------------------------------------------------------------------------------------------------------------------------------------------------------------------------------------------------------------------------------------------------------------------------------------------------------------------------------------------------------------------------------------------------------------------------------------------------------------------------------------------------------------------------------------------------------------------------------------------------------------------------------------------------------------------------------------------------------------------------------------------------------------------------------------------|
| #1       | "Aged"[MeSH Terms] OR "older adult"[All Fields] OR "older adults"[All Fields] OR "senior"[All Fields] OR "seniors"[All Fields] OR "Elderly"[All Fields] OR "elder"[All Fields] OR "Aged"[All Fields] OR "older people"[All Fields] OR "old person"[All Fields] OR "older patient"[All Fields] OR "older patients"[All Fields] OR "old age"[All Fields] OR "aging adult"[All Fields] OR "aging adults"[All Fields] OR "ageing adult"[All Fields] OR "ageing adults"[All Fields]                                                                                                                                                                                                                                                                                                                                                                                                                                                                                                                                                                                                                                                                                                                                                                                                                                                                                                                                                                                                                                                                                                                                                                                                                                                                                                                                                                                                                                                                                                                                                                                                                                                                                                                                                                                                                                                                                                                                                                                                                                                                                                                                                                                                                                                                                                         |
| #2       | "dementia"[MeSH Terms] OR "Lewy Body Disease"[MeSH Terms] OR "dementia"[All Fields] OR "Alzheimer Disease"[All Fields] OR "Alzheimer"[All Fields] OR "Alzheimer's"[All Fields] OR "Lewy"[All Fields] OR "Vascular dementia"[All Fields] OR "alcohol related dementia"[All Fields] OR "Parkinson's disease dementia"[All Fields] OR "Lewy Body Disease"[All Fields]                                                                                                                                                                                                                                                                                                                                                                                                                                                                                                                                                                                                                                                                                                                                                                                                                                                                                                                                                                                                                                                                                                                                                                                                                                                                                                                                                                                                                                                                                                                                                                                                                                                                                                                                                                                                                                                                                                                                                                                                                                                                                                                                                                                                                                                                                                                                                                                                                     |
| #3       | "Behavioral Disciplines and Activities"[MeSH Terms] OR "Behavior Therapy"[MeSH Terms] OR "Psychotherapy"[MeSH Terms] OR "Reality Therapy"[MeSH Terms] OR "Exercise"[MeSH Terms] OR "Massage"[MeSH Terms] OR "Aromatherapy"[MeSH Terms] OR "Animal Assisted Therapy"[MeSH Terms] OR "Horticultural Therapy"[MeSH Terms] OR "Art Therapy"[MeSH Terms] OR "Music Therapy"[MeSH Terms] OR "Occupational Therapy"[MeSH Terms] OR "Play Therapy"[MeSH Terms] OR "Recreation Therapy"[MeSH Terms] OR "Transcutaneous Electric Nerve Stimulation"[MeSH Terms] OR "meditation"[MeSH Terms] OR "mindfulness"[MeSH Terms] OR "Behavioral Disciplines and Activities"[All Fields] OR "Non pharmacological"[All Fields] OR "non drug"[All Fields] OR "behavioral"[All Fields] OR "Behavior Therapy"[All Fields] OR "psychosocial"[All Fields] OR "Psychodynamic therapy"[All Fields] OR "Psychotherapy"[All Fields] OR "Psychological treatment"[All Fields] OR "Cognitive Stimulation Therapy"[All Fields] OR "Cognitive Therapy"[All Fields] OR "cognitive training"[All Fields] OR "cognitive rehabilitation"[All Fields] OR "Reality Orientation"[All Fields] OR "Reminiscence"[All Fields] OR "Reminiscences"[All Fields] OR "autobiography"[All Fields] OR "life review"[All Fields] OR "storytelling"[All Fields] OR "oral history"[All Fields] OR "life history"[All Fields] OR "validation therapy"[All Fields] OR "Reality Therapy"[All Fields] OR "dementia care mapping"[All Fields] OR "Montessori based activities"[All Fields] OR "ability focused"[All Fields] OR "Exercise"[All Fields] OR "Physical"[All Fields] OR "muscle relaxation"[All Fields] OR "touch"[All Fields] OR "touch therapy"[All Fields] OR "Massage"[All Fields] OR "Multi component therapy"[All Fields] OR "Aromatherapy"[All Fields] OR "Animal Assisted Therapy"[All Fields] OR "doll therapy"[All Fields] OR "robot therapy"[All Fields] OR "pet robot"[All Fields] OR "Horticultural Therapy"[All Fields] OR "Art Therapy"[All Fields] OR "painting"[All Fields] OR "Spaced retrieval"[All Fields] OR "Music Therapy"[All Fields] OR "light therapy"[All Fields] OR "Occupational Therapy"[All Fields] OR "Play Therapy"[All Fields] OR "Recreation Therapy"[All Fields] OR "snoezelen"[All Fields] OR "multimodality therapy"[All Fields] OR "sensory"[All Fields] OR "sensory stimulation"[All Fields] OR "Transcutaneous Electric Nerve Stimulation"[All Fields] OR "TENS"[All Fields] OR "emotion oriented"[All Fields] OR "therapeutic conversation"[All Fields] OR "meditation"[All Fields] OR "mindfulness"[All Fields] OR "Special care"[All Fields] OR "Simulated presence therapy"[All Fields] OR "multisensorial"[All Fields] OR "multisensory"[All Fields] OR "brain stimulation"[All Fields] |
| #4       | "Behavioral Symptoms"[MeSH Terms] OR "Problem Behavior"[MeSH Terms] OR "Psychomotor Agitation"[MeSH Terms] OR "Irritable Mood"[MeSH Terms] OR                                                                                                                                                                                                                                                                                                                                                                                                                                                                                                                                                                                                                                                                                                                                                                                                                                                                                                                                                                                                                                                                                                                                                                                                                                                                                                                                                                                                                                                                                                                                                                                                                                                                                                                                                                                                                                                                                                                                                                                                                                                                                                                                                                                                                                                                                                                                                                                                                                                                                                                                                                                                                                          |

|    |                                                                                                                                                                                                                                                                                                                                                                                                                                                                                                                                                                                                                                                                                                                                                                                                                                                                                                                                                                                                                                                                                                                                                                                                                                                                                                                                                                                                                                                                                                                                                                                                                                                                                                                                                                                                                                                                                                                                                                                                                                                                                                                                                                                                                                                                                                                                                                                                                                                                            |
|----|----------------------------------------------------------------------------------------------------------------------------------------------------------------------------------------------------------------------------------------------------------------------------------------------------------------------------------------------------------------------------------------------------------------------------------------------------------------------------------------------------------------------------------------------------------------------------------------------------------------------------------------------------------------------------------------------------------------------------------------------------------------------------------------------------------------------------------------------------------------------------------------------------------------------------------------------------------------------------------------------------------------------------------------------------------------------------------------------------------------------------------------------------------------------------------------------------------------------------------------------------------------------------------------------------------------------------------------------------------------------------------------------------------------------------------------------------------------------------------------------------------------------------------------------------------------------------------------------------------------------------------------------------------------------------------------------------------------------------------------------------------------------------------------------------------------------------------------------------------------------------------------------------------------------------------------------------------------------------------------------------------------------------------------------------------------------------------------------------------------------------------------------------------------------------------------------------------------------------------------------------------------------------------------------------------------------------------------------------------------------------------------------------------------------------------------------------------------------------|
|    | "aggression"[MeSH Terms] OR "depressive disorder"[MeSH Terms] OR "depression"[MeSH Terms] OR "anxiety"[MeSH Terms] OR "delusions"[MeSH Terms] OR "hallucinations"[MeSH Terms] OR "Sleep Deprivation"[MeSH Terms] OR "apathy"[MeSH Terms] OR "Euphoria"[MeSH Terms] OR "Appetite"[MeSH Terms] OR "Behavioral Symptoms"[All Fields] OR "neuropsychic symptoms"[All Fields] OR "behavior"[All Fields] OR "behaviors"[All Fields] OR "behavior"[All Fields] OR "behaviours"[All Fields] OR "behavioral psychological symptoms"[All Fields] OR "behavioral and psychological symptoms"[All Fields] OR "behavioural and psychological symptoms"[All Fields] OR "BPSD"[All Fields] OR "BSD"[All Fields] OR "behavioral problems"[All Fields] OR "Problem Behavior"[All Fields] OR "repetitive behavior"[All Fields] OR "repetitive"[All Fields] OR "agitation"[All Fields] OR "pacing"[All Fields] OR "wander"[All Fields] OR "wanders"[All Fields] OR "wandering"[All Fields] OR "walking"[All Fields] OR "safe walking"[All Fields] OR "sundowning"[All Fields] OR "Night time behavior"[All Fields] OR "challenging behavior"[All Fields] OR "disruptive"[All Fields] OR "restless"[All Fields] OR "Psychomotor Agitation"[All Fields] OR "Irritability"[All Fields] OR "Irritable Mood"[All Fields] OR "Disinhibition"[All Fields] OR "aggression"[All Fields] OR "aggressive"[All Fields] OR "aberrant"[All Fields] OR "aberrant motor behavior"[All Fields] OR "social inappropriateness"[All Fields] OR "vocalization"[All Fields] OR "vocalisation"[All Fields] OR "psychomotor activity"[All Fields] OR "psychosis"[All Fields] OR "Psychotic Disorders"[All Fields] OR "psycho"[All Fields] OR "psycho social"[All Fields] OR "neuropsychiatric symptom"[All Fields] OR "depression"[All Fields] OR "depressive"[All Fields] OR "depressive disorder"[All Fields] OR "mood disturbance"[All Fields] OR "anxiety"[All Fields] OR "delusions"[All Fields] OR "depressive disorder"[All Fields] OR "hallucination"[All Fields] OR "Sleep disturbance"[All Fields] OR "Sleep disorders"[All Fields] OR "Sleeping disorders"[All Fields] OR "Sleep Deprivation"[All Fields] OR "apathy"[All Fields] OR "Indifference"[All Fields] OR "dysphoria"[All Fields] OR "Euphoria"[All Fields] OR "Elation"[All Fields] OR "Appetite"[All Fields] OR "Eating change"[All Fields] OR "personality change"[All Fields] OR "behavioural"[All Fields] OR "neuropsychiatric"[All Fields]— |
| #5 | "Systematic Review"[Publication Type] OR "meta-analysis"[Publication Type] OR "Systematic Review"[All Fields] OR "meta-analysis"[All Fields] OR "Systematic Review"[Title/Abstract] OR "meta-analysis"[Title/Abstract]                                                                                                                                                                                                                                                                                                                                                                                                                                                                                                                                                                                                                                                                                                                                                                                                                                                                                                                                                                                                                                                                                                                                                                                                                                                                                                                                                                                                                                                                                                                                                                                                                                                                                                                                                                                                                                                                                                                                                                                                                                                                                                                                                                                                                                                     |
| #6 | #1 AND #2 AND #3 AND #4 AND #5                                                                                                                                                                                                                                                                                                                                                                                                                                                                                                                                                                                                                                                                                                                                                                                                                                                                                                                                                                                                                                                                                                                                                                                                                                                                                                                                                                                                                                                                                                                                                                                                                                                                                                                                                                                                                                                                                                                                                                                                                                                                                                                                                                                                                                                                                                                                                                                                                                             |
| #7 | #6 AND Applied limits (publication year ≤ 10 years)                                                                                                                                                                                                                                                                                                                                                                                                                                                                                                                                                                                                                                                                                                                                                                                                                                                                                                                                                                                                                                                                                                                                                                                                                                                                                                                                                                                                                                                                                                                                                                                                                                                                                                                                                                                                                                                                                                                                                                                                                                                                                                                                                                                                                                                                                                                                                                                                                        |

Table A2. Search Trail for CINAHL

| Search # | Subject Headings (MH) and Key Words                                                                                                                                                                                                                                                                                                                                                                                                                                                                                                                                                                                                                                                                                                                                                                                                                                                                                                                                                                                                                                                                                                                                                                                                                                                                                                                                                                                                                                                                                                                                                                                                                                                                                                                                                                                                      |
|----------|------------------------------------------------------------------------------------------------------------------------------------------------------------------------------------------------------------------------------------------------------------------------------------------------------------------------------------------------------------------------------------------------------------------------------------------------------------------------------------------------------------------------------------------------------------------------------------------------------------------------------------------------------------------------------------------------------------------------------------------------------------------------------------------------------------------------------------------------------------------------------------------------------------------------------------------------------------------------------------------------------------------------------------------------------------------------------------------------------------------------------------------------------------------------------------------------------------------------------------------------------------------------------------------------------------------------------------------------------------------------------------------------------------------------------------------------------------------------------------------------------------------------------------------------------------------------------------------------------------------------------------------------------------------------------------------------------------------------------------------------------------------------------------------------------------------------------------------|
| #1       | (MH "Aged") OR "older adults" OR "seniors" OR "Elderly" OR "elder" OR "Aged" OR "older adult" OR "senior" OR "older people" OR "old person" OR "older patient" OR "older patients" OR "old age" OR "aging adult" OR "aging adults" OR "ageing adult" OR "ageing adults"                                                                                                                                                                                                                                                                                                                                                                                                                                                                                                                                                                                                                                                                                                                                                                                                                                                                                                                                                                                                                                                                                                                                                                                                                                                                                                                                                                                                                                                                                                                                                                  |
| #2       | (MH "Dementia") OR (MH "Alzheimer's Disease") OR (MH "Lewy Body Disease") OR "dementia" OR "Alzheimer Disease" OR "Alzheimer" OR "Alzheimer's" OR "Lewy" OR "Vascular dementia" OR "alcohol related dementia" OR "Parkinson's disease dementia" OR "Lewy Body Disease"                                                                                                                                                                                                                                                                                                                                                                                                                                                                                                                                                                                                                                                                                                                                                                                                                                                                                                                                                                                                                                                                                                                                                                                                                                                                                                                                                                                                                                                                                                                                                                   |
| #3       | (MH "Cognitive Therapy") OR (MH "Behavior Therapy") OR (MH "Psychotherapy") OR (MH "Reality Therapy") OR (MH "Exercise") OR (MH "Massage") OR (MH "Aromatherapy") OR (MH "Animal Assisted Therapy") OR (MH "Art Therapy") OR (MH "Music Therapy") OR (MH "Occupational Therapy") OR (MH "Play Therapy") OR (MH "Recreational Therapy") OR (MH "Transcutaneous Electric Nerve Stimulation") OR (MH "meditation") OR (MH "mindfulness") OR "Behavioral Disciplines and Activities" OR "Non pharmacological" OR "non drug" OR "behavioral" OR "Behavior Therapy" OR "psychosocial" OR "Psychodynamic therapy" OR "Psychotherapy" OR "Psychological treatment" OR "Cognitive Stimulation Therapy" OR "Cognitive Therapy" OR "cognitive training" OR "cognitive rehabilitation" OR "Reality Orientation" OR "Reminiscence" OR "Reminiscences" OR "autobiography" OR "life review" OR "storytelling" OR "oral history" OR "life history" OR "validation therapy" OR "Reality Therapy" OR "dementia care mapping" OR "Montessori based activities" OR "ability focused" OR "Exercise" OR "Physical" OR "muscle relaxation" OR "touch" OR "touch therapy" OR "Massage" OR "Multi component therapy" OR "Aromatherapy" OR "Animal Assisted Therapy" OR "doll therapy" OR "robot therapy" OR "Horticultural Therapy" OR "Art Therapy" OR "painting" OR "Spaced retrieval" OR "Music Therapy" OR "light therapy" OR "Occupational Therapy" OR "Play Therapy" OR "Recreation Therapy" OR "snoezelen" OR "multimodality therapy" OR "sensory" OR "sensory stimulation" OR "Transcutaneous Electric Nerve Stimulation" OR "TENS" OR "emotion oriented" OR "therapeutic conversation" OR "meditation" OR "mindfulness" OR "Special care" OR "pet robot" OR " Simulated presence therapy" OR " multisensorial" OR " multisensory" OR "brain stimulation" |
| #4       | (MH "Behavioral Symptoms") OR (MH "aggression") OR (MH "Psychotic Disorders") OR (MH "depression") OR (MH "delusions") OR (MH "anxiety") OR (MH "hallucinations") OR (MH "Sleep Deprivation") OR (MH "apathy") OR (MH "Appetite") OR "Behavioral Symptoms" OR "neuropsychic symptoms" OR "behavior" OR "behaviors" OR "behaviour" OR "behaviours" OR "behavioral psychological symptoms" OR "behavioral and psychological symptoms" OR "behavioural and psychological symptoms" OR "BPSD" OR "BSD" OR "behavioral problems" OR "Problem Behavior" OR "repetitive behavior" OR "repetitive" OR "agitation" OR "pacing" OR "wander" OR "wanders" OR "wandering" OR "walking" OR "safe walking" OR "sundowning" OR "Night time behavior" OR "challenging behavior" OR "disruptive" OR "restless" OR "Psychomotor Agitation" OR "Irritability" OR "Irritable Mood" OR "Disinhibition" OR "aggression" OR "aggressive" OR "aberrant" OR "aberrant motor behavior" OR "social inappropriateness" OR "vocalization" OR "vocalisation" OR "psychomotor activity" OR "psychosis" OR "Psychotic Disorders" OR "psycho" OR "psycho social" OR "neuropsychiatric symptom" OR "depression" OR "depressive" OR "depressive disorder" OR "mood disturbance" OR "anxiety" OR "delusions" OR "depressive disorder" OR "hallucination" OR "Sleep disturbance" OR "Sleep disorders" OR "Sleeping disorders" OR "Sleep Deprivation" OR "apathy" OR "Indifference" OR "dysphoria" OR "Euphoria" OR "Elation" OR "Appetite" OR                                                                                                                                                                                                                                                                                                                                 |

---

|    |                                                                                                                                                                                            |
|----|--------------------------------------------------------------------------------------------------------------------------------------------------------------------------------------------|
|    | "Eating change" OR "personality change" OR "behavioural" OR "neuropsychiatric" OR "mood"                                                                                                   |
| #5 | (MH "Systematic Review") OR (MH "Meta Analysis") OR TI "systematic review" OR AB "systematic review" OR TI "meta-analysis" OR AB "meta-analysis" OR "systematic review" OR "meta-analysis" |
| #6 | S1 AND S2 AND S3 AND S4 AND S5                                                                                                                                                             |
| #7 | S6 AND [Applied filters] Published Date: 2012-2022                                                                                                                                         |

---

**Table A3. Search Trail for PsycINFO**

| Search # | Main Subjects and Key Words                                                                                                                                                                                                                                                                                                                                                                                                                                                                                                                                                                                                                                                                                                                                                                                                                                                                                                                                                                                                                                                                                                                                                                                                                                                                                                                                                                                                                                                                                                                                                                                                                                                                                                                                                                                                                                                                                                                                                                                                                                                                                                   |
|----------|-------------------------------------------------------------------------------------------------------------------------------------------------------------------------------------------------------------------------------------------------------------------------------------------------------------------------------------------------------------------------------------------------------------------------------------------------------------------------------------------------------------------------------------------------------------------------------------------------------------------------------------------------------------------------------------------------------------------------------------------------------------------------------------------------------------------------------------------------------------------------------------------------------------------------------------------------------------------------------------------------------------------------------------------------------------------------------------------------------------------------------------------------------------------------------------------------------------------------------------------------------------------------------------------------------------------------------------------------------------------------------------------------------------------------------------------------------------------------------------------------------------------------------------------------------------------------------------------------------------------------------------------------------------------------------------------------------------------------------------------------------------------------------------------------------------------------------------------------------------------------------------------------------------------------------------------------------------------------------------------------------------------------------------------------------------------------------------------------------------------------------|
| #1       | MAINSUBJECT.EXACT("Aged") OR "older adults" OR "seniors" OR "Elderly" OR "elder" OR "Aged" OR "older adult" OR "senior" OR "older people" OR "old person" OR "older patient" OR "older patients" OR "old age" OR "aging adult" OR "aging adults" OR "ageing adult" OR "ageing adults"                                                                                                                                                                                                                                                                                                                                                                                                                                                                                                                                                                                                                                                                                                                                                                                                                                                                                                                                                                                                                                                                                                                                                                                                                                                                                                                                                                                                                                                                                                                                                                                                                                                                                                                                                                                                                                         |
| #2       | MAINSUBJECT.EXACT("DEMENTIA") OR MAINSUBJECT.EXACT("Alzheimer's Disease") OR MAINSUBJECT.EXACT("Lewy Body Disease") OR "dementia" OR "Alzheimer's Disease" OR "Alzheimer's" OR "Alzheimer" OR "Vascular dementia" OR "alcohol related dementia" OR "Parkinson's disease dementia" OR "Lewy" OR "Lewy Body Disease"                                                                                                                                                                                                                                                                                                                                                                                                                                                                                                                                                                                                                                                                                                                                                                                                                                                                                                                                                                                                                                                                                                                                                                                                                                                                                                                                                                                                                                                                                                                                                                                                                                                                                                                                                                                                            |
| #3       | MAINSUBJECT.EXACT("Cognitive Therapy") OR MAINSUBJECT.EXACT("Behavior Therapy") OR MAINSUBJECT.EXACT("Psychotherapy") OR MAINSUBJECT.EXACT("Reality Therapy") OR MAINSUBJECT.EXACT("Exercise") OR MAINSUBJECT.EXACT("Massage") OR MAINSUBJECT.EXACT("Aromatherapy") OR MAINSUBJECT.EXACT("Animal Assisted Therapy") OR MAINSUBJECT.EXACT("Horticultural Therapy") OR MAINSUBJECT.EXACT("Art Therapy") OR MAINSUBJECT.EXACT("Music Therapy") OR MAINSUBJECT.EXACT("Occupational Therapy") OR MAINSUBJECT.EXACT("Play Therapy") OR MAINSUBJECT.EXACT("Recreational Therapy") OR MAINSUBJECT.EXACT("Transcutaneous Electric Nerve Stimulation") OR MAINSUBJECT.EXACT("meditation") OR MAINSUBJECT.EXACT("mindfulness") OR "behavioral Disciplines and Activities" OR "Non pharmacological" OR "non drug" OR "behavioral" OR "Behavior Therapy" OR "psychosocial" OR "Psychodynamic therapy" OR "Psychotherapy" OR "Psychological treatment" OR "Cognitive Stimulation Therapy" OR "Cognitive Therapy" OR "cognitive training" OR "cognitive rehabilitation" OR "Reality Orientation" OR "Reminiscence" OR "Reminiscences" OR "RT" OR "autobiography" OR "life review" OR "storytelling" OR "oval history" OR "life history" OR "validation therapy" OR "Reality Therapy" OR "dementia care mapping" OR "Montessori based activities" OR "ability focused" OR "Exercise" OR "Physical" OR "muscle relaxation" OR "touch" OR "touch therapy" OR "Massage" OR "Multi component therapy" OR "Aromatherapy" OR "Animal Assisted Therapy" OR "doll therapy" OR "robot therapy" OR "Horticultural Therapy" OR "Art Therapy" OR "painting" OR "Spaced retrieval" OR "Music Therapy" OR "light therapy" OR "Occupational Therapy" OR "Play Therapy" OR "Recreation Therapy" OR "snoezelen" OR "multimodality therapy" OR "sensory" OR "sensory stimulation" OR "Transcutaneous Electric Nerve Stimulation" OR "TENS" OR "emotion oriented" OR "therapeutic conversation" OR "meditation" OR "mindfulness" OR "Special care" OR "pet robot" OR " Simulated presence therapy" OR "multisensorial" OR " multisensory" OR "brain stimulation" |
| #4       | MAINSUBJECT.EXACT("behavioral Symptoms") OR MAINSUBJECT.EXACT("apathy") OR MAINSUBJECT.EXACT("Sleep Deprivation") OR MAINSUBJECT.EXACT("aggression") OR MAINSUBJECT.EXACT("Psychomotor Agitation") OR MAINSUBJECT.EXACT("depression") OR MAINSUBJECT.EXACT("delusions") OR MAINSUBJECT.EXACT("anxiety") OR MAINSUBJECT.EXACT("hallucinations") OR MAINSUBJECT.EXACT("Appetite") OR MAINSUBJECT.EXACT("Psychotic Disorders") OR "behavioral Symptoms" OR "neuropsychic symptoms" OR "behavior" OR "behaviors" OR "behavior" OR "behaviours" OR "behavioral psychological symptoms" OR "behavioral and psychological symptoms" OR "behavioural and psychological symptoms" OR "BPSD"                                                                                                                                                                                                                                                                                                                                                                                                                                                                                                                                                                                                                                                                                                                                                                                                                                                                                                                                                                                                                                                                                                                                                                                                                                                                                                                                                                                                                                            |

---

|    |                                                                                                                                                                                                                                                                                                                                                                                                                                                                                                                                                                                                                                                                                                                                                                                                                                                                                                                                                                                                                                                                                                         |
|----|---------------------------------------------------------------------------------------------------------------------------------------------------------------------------------------------------------------------------------------------------------------------------------------------------------------------------------------------------------------------------------------------------------------------------------------------------------------------------------------------------------------------------------------------------------------------------------------------------------------------------------------------------------------------------------------------------------------------------------------------------------------------------------------------------------------------------------------------------------------------------------------------------------------------------------------------------------------------------------------------------------------------------------------------------------------------------------------------------------|
|    | OR "BSD" OR "behavioral problems" OR "Problem Behavior" OR "repetitive behavior" OR "repetitive" OR "agitation" OR "pacing" OR "wander" OR "wanders" OR "wandering" OR "walking" OR "safe walking" OR "sundowning" OR "Night time behavior" OR "challenging behavior" OR "disruptive" OR "restless" OR "Psychomotor Agitation" OR "Irritability" OR "Irritable Mood" OR "Disinhibition" OR "aggression" OR "aggressive" OR "aberrant" OR "aberrant motor behavior" OR "social inappropriateness" OR "vocalization" OR "vocalization" OR "psychomotor activity" OR "psychosis" OR "Psychotic Disorders" OR "psycho" OR "psycho social" OR "neuropsychiatric symptom" OR "depression" OR "depressive" OR "depressive disorder" OR "mood disturbance" OR "anxiety" OR "delusions" OR "depressive disorder" OR "hallucination" OR "Sleep disturbance" OR "Sleep disorders" OR "Sleeping disorders" OR "Sleep Deprivation" OR "apathy" OR "Indifference" OR "dysphoria" OR "Euphoria" OR "Elation" OR "Appetite" OR "Eating change" OR "personality change" OR "behavioural" OR "neuropsychiatric" OR "mood" |
| #5 | MAINSUBJECT.EXACT("systematic review") OR MAINSUBJECT.EXACT("meta analysis") OR tiab("systematic review") OR tiab("meta-analysis") OR "systematic review" OR "meta-analysis"                                                                                                                                                                                                                                                                                                                                                                                                                                                                                                                                                                                                                                                                                                                                                                                                                                                                                                                            |
| #6 | S1 AND S2 AND S3 AND S4 AND S5                                                                                                                                                                                                                                                                                                                                                                                                                                                                                                                                                                                                                                                                                                                                                                                                                                                                                                                                                                                                                                                                          |
| #7 | S7 AND [Applied filters] Published Date: 2012-2022                                                                                                                                                                                                                                                                                                                                                                                                                                                                                                                                                                                                                                                                                                                                                                                                                                                                                                                                                                                                                                                      |

---

**Table A4. Search Trail for Embase**

| Search # | MeSH Terms and Key Words                                                                                                                                                                                                                                                                                                                                                                                                                                                                                                                                                                                                                                                                                                                                                                                                                                                                                                                                                                                                                                                                                                                                                                                                                                                                                                                                                                                                                                                                                                                                                                                                                       |
|----------|------------------------------------------------------------------------------------------------------------------------------------------------------------------------------------------------------------------------------------------------------------------------------------------------------------------------------------------------------------------------------------------------------------------------------------------------------------------------------------------------------------------------------------------------------------------------------------------------------------------------------------------------------------------------------------------------------------------------------------------------------------------------------------------------------------------------------------------------------------------------------------------------------------------------------------------------------------------------------------------------------------------------------------------------------------------------------------------------------------------------------------------------------------------------------------------------------------------------------------------------------------------------------------------------------------------------------------------------------------------------------------------------------------------------------------------------------------------------------------------------------------------------------------------------------------------------------------------------------------------------------------------------|
| #1       | 'aged'/exp OR 'older adults' OR senior OR seniors OR Elderly OR elder OR Aged OR 'older adult' OR 'older people' OR 'old person' OR 'older patient' OR 'older patients' OR 'old age' OR 'aging adult' OR 'aging adults' OR 'ageing adult' OR 'ageing adults'                                                                                                                                                                                                                                                                                                                                                                                                                                                                                                                                                                                                                                                                                                                                                                                                                                                                                                                                                                                                                                                                                                                                                                                                                                                                                                                                                                                   |
| #2       | 'dementia'/exp OR dementia OR 'Alzheimer disease' OR Alzheimer OR Alzheimers OR Lewy OR 'vascular dementia' OR 'alcohol related dementia' OR 'Parkinsons disease dementia' OR 'Lewy body disease'                                                                                                                                                                                                                                                                                                                                                                                                                                                                                                                                                                                                                                                                                                                                                                                                                                                                                                                                                                                                                                                                                                                                                                                                                                                                                                                                                                                                                                              |
| #3       | 'Psychotherapy'/exp OR 'Exercise'/exp OR 'Massage'/exp OR 'Aromatherapy'/exp OR 'Animal Assisted Therapy'/exp OR 'Horticultural Therapy'/exp OR 'Occupational Therapy'/exp OR 'recreational therapy'/exp OR 'Transcutaneous Electric Nerve Stimulation'/exp OR 'meditation'/exp OR 'Behavioral symptoms' OR Activities OR 'Non pharmacological' OR 'non drug' OR behavioral OR 'Behavior Therapy' OR psychosocial OR 'Psycho dynamic therapy' OR Psychotherapy OR 'Psychological treatment' OR 'Cognitive Stimulation Therapy' OR 'Cognitive Therapy' OR 'cognitive training' OR 'cognitive rehabilitation' OR 'Reality Orientation' OR Reminiscence OR Reminiscences OR RT OR autobiography OR 'life review' OR storytelling OR 'oral history' OR 'life history' OR 'validation therapy' OR 'Reality Therapy' OR 'Dementia Care Mapping' OR 'Montessori Based Activities' OR 'ability focused' OR Exercise OR Physical OR 'muscle relaxation' OR Touch OR 'touch therapy' OR Massage OR 'Multi component therapy' OR Aromatherapy OR 'Animal Assisted Therapy' OR 'doll therapy' OR 'robot therapy' OR 'Horticultural Therapy' OR 'Art Therapy' OR painting OR 'Spaced retrieval' OR 'Music Therapy' OR 'light therapy' OR Occupational Therapy OR 'Play Therapy' OR 'recreational Therapy' OR snoezelen OR 'multimodality therapy' OR sensory OR 'sensory stimulation' OR 'Transcutaneous Electric Nerve Stimulation' OR TENS OR 'emotion oriented' OR 'therapeutic conversation' OR Meditation OR mindfulness OR 'Special care' OR 'pet robot' OR 'Simulated presence therapy' OR 'multisensorial' OR 'multisensory' OR 'brain stimulation' |
| #4       | 'behavior disorder'/exp OR 'irritability'/exp OR 'aggression'/exp OR 'depression'/exp OR 'anxiety'/exp OR 'delusion'/exp OR 'hallucination'/exp OR 'Sleep Deprivation'/exp OR 'apathy'/exp OR 'Euphoria'/exp OR 'Appetite'/exp OR 'behavior change'/exp OR 'restlessness'/exp OR 'Behavioral Symptoms' OR 'neuropsychic symptoms' OR behavior OR behaviors OR behavior OR behaviours OR 'behavioral psychological symptoms' OR 'behavioral and psychological symptoms' OR 'behavioural and psychological symptoms' OR BPSD OR BSD OR 'behavioral problems' OR 'Problem Behavior' OR 'repetitive behavior' OR repetitive OR agitation OR pacing OR wander OR wanders OR wandering OR walking OR 'safe walking' OR sundowning OR 'Night time behavior' OR 'challenging behavior' OR disruptive OR restless OR 'Psychomotor Agitation' OR Irritability OR 'Irritable Mood' OR Disinhibition OR aggression OR aggressive OR aberrant OR 'aberrant motor behavior' OR 'social inappropriateness' OR vocalization OR vocalisation OR 'psychomotor activity' OR psychosis OR 'Psychotic Disorders' OR psycho OR psycho social OR 'neuropsychiatric symptom' OR depression OR depressive OR 'depressive disorder' OR 'mood disturbance' OR anxiety OR delusions OR 'depressive disorder' OR hallucination OR 'Sleep disturbance' OR 'Sleep disorders' OR 'Sleeping disorders' OR 'Sleep Deprivation' OR apathy OR Indifference OR dysphoria OR Euphoria OR Elation OR Appetite OR 'Eating change' OR 'personality change' OR 'behavioural' OR 'neuropsychiatric'                                                                                       |
| #5       | 'systematic review'/exp OR 'meta analysis'/exp OR 'systematic review':ti OR 'meta analysis':ti OR 'systematic review':ab OR 'meta analysis':ab OR 'systematic review' OR 'meta analysis'                                                                                                                                                                                                                                                                                                                                                                                                                                                                                                                                                                                                                                                                                                                                                                                                                                                                                                                                                                                                                                                                                                                                                                                                                                                                                                                                                                                                                                                       |
| #6       | #1 AND #2 AND #3 AND #4 AND #5                                                                                                                                                                                                                                                                                                                                                                                                                                                                                                                                                                                                                                                                                                                                                                                                                                                                                                                                                                                                                                                                                                                                                                                                                                                                                                                                                                                                                                                                                                                                                                                                                 |

---

|    |                                                                                                                                |
|----|--------------------------------------------------------------------------------------------------------------------------------|
| #7 | #6 AND (2012:py OR 2013:py OR 2014:py OR 2015:py OR 2016:py OR 2017:py OR 2018:py OR 2019:py OR 2020:py OR 2021:py OR 2022:py) |
|----|--------------------------------------------------------------------------------------------------------------------------------|

---



**Table A5. Search Trail for Cochrane**

| <b>Search #</b> | <b>MeSH Terms and Key Words</b>                                                                                                                                                                                                                                                                                                                                                                                                                                                                                                                                                                                                                                                                                                                                                                                                                                                                                                                                                                                                                                                                                                                                                                                                                                                                                                                                                                                                                                                                                                                                                                                                                                                                                                                                                                                                                                                                                                                                                                                                                                                                                                                                                                                                                                                                 |
|-----------------|-------------------------------------------------------------------------------------------------------------------------------------------------------------------------------------------------------------------------------------------------------------------------------------------------------------------------------------------------------------------------------------------------------------------------------------------------------------------------------------------------------------------------------------------------------------------------------------------------------------------------------------------------------------------------------------------------------------------------------------------------------------------------------------------------------------------------------------------------------------------------------------------------------------------------------------------------------------------------------------------------------------------------------------------------------------------------------------------------------------------------------------------------------------------------------------------------------------------------------------------------------------------------------------------------------------------------------------------------------------------------------------------------------------------------------------------------------------------------------------------------------------------------------------------------------------------------------------------------------------------------------------------------------------------------------------------------------------------------------------------------------------------------------------------------------------------------------------------------------------------------------------------------------------------------------------------------------------------------------------------------------------------------------------------------------------------------------------------------------------------------------------------------------------------------------------------------------------------------------------------------------------------------------------------------|
| #1              | MeSH descriptor: [Aged] explode all trees OR older adults OR seniors OR Elderly OR elder OR Aged OR older people OR old person OR older patient OR older patients OR old age OR aging adult OR aging adults OR ageing adult OR ageing adults                                                                                                                                                                                                                                                                                                                                                                                                                                                                                                                                                                                                                                                                                                                                                                                                                                                                                                                                                                                                                                                                                                                                                                                                                                                                                                                                                                                                                                                                                                                                                                                                                                                                                                                                                                                                                                                                                                                                                                                                                                                    |
| #2              | MeSH descriptor: [Dementia] explode all trees OR MeSH descriptor: [Lewy Body Disease] explode all trees OR dementia OR Alzheimer Disease OR Alzheimer OR Alzheimer's OR Lewy OR Vascular dementia OR alcohol related dementia OR Parkinson's disease dementia OR Lewy Body Disease                                                                                                                                                                                                                                                                                                                                                                                                                                                                                                                                                                                                                                                                                                                                                                                                                                                                                                                                                                                                                                                                                                                                                                                                                                                                                                                                                                                                                                                                                                                                                                                                                                                                                                                                                                                                                                                                                                                                                                                                              |
| #3              | MeSH descriptor: [Behavioral Disciplines and Activities] explode all trees OR MeSH descriptor: [Behavior Therapy] explode all trees OR MeSH descriptor: [Psychotherapy] explode all trees OR MeSH descriptor: [Reality Therapy] explode all trees OR MeSH descriptor: [Exercise] explode all trees OR MeSH descriptor: [Massage] explode all trees OR MeSH descriptor: [Aromatherapy] explode all trees OR MeSH descriptor: [Animal Assisted Therapy] explode all trees OR MeSH descriptor: [Horticultural Therapy] explode all trees OR MeSH descriptor: [Art Therapy] explode all trees OR MeSH descriptor: [Music Therapy] explode all trees OR MeSH descriptor: [Occupational Therapy] explode all trees OR MeSH descriptor: [Play Therapy] explode all trees OR MeSH descriptor: [Recreation Therapy] explode all trees OR MeSH descriptor: [Transcutaneous Electric Nerve Stimulation] explode all trees OR MeSH descriptor: [Meditation] explode all trees OR MeSH descriptor: [Mindfulness] explode all trees OR Behavioral Disciplines and Activities OR Non pharmacological OR non drug OR behavioral OR Behavior Therapy OR psychosocial OR Psychodynamic therapy OR Psychotherapy OR Psychological treatment OR Cognitive Stimulation Therapy OR Cognitive Therapy OR cognitive training OR cognitive rehabilitation OR Reality Orientation OR Reminiscence OR Reminiscences OR RT OR autobiography OR life review OR storytelling OR oral history OR life history OR validation therapy OR Reality Therapy OR dementia care mapping OR Montessori based activities OR ability focused OR Exercise OR Physical OR muscle relaxation OR Touch OR touch therapy OR Massage OR Multi component therapy OR Aromatherapy OR Animal Assisted Therapy OR doll therapy OR robot therapy OR Horticultural Therapy OR Art Therapy OR painting OR Spaced retrieval OR Music Therapy OR light therapy OR Occupational Therapy OR Play Therapy OR Recreation Therapy OR snoezelen OR multimodality therapy OR sensory OR sensory stimulation OR Transcutaneous Electric Nerve Stimulation OR TENS OR emotion oriented OR therapeutic conversation OR Meditation OR mindfulness OR Special care OR pet robot OR simulated presence therapy OR multisensorial OR multisensory OR brain stimulation |
| #4              | MeSH descriptor: [Behavioral Symptoms] explode all trees OR MeSH descriptor: [Psychomotor Agitation] explode all trees OR MeSH descriptor: [Irritable Mood] explode all trees OR MeSH descriptor: [Depressive Disorder] explode all trees OR MeSH descriptor: [Anxiety] explode all trees OR MeSH descriptor: [Hallucinations] explode all trees OR MeSH descriptor: [Sleep Deprivation] explode all trees OR MeSH descriptor: [Apathy] explode all trees OR MeSH descriptor: [Euphoria] explode all trees OR Behavioral Symptoms OR neuropsychic symptoms OR behavior OR behaviors OR behavior OR behaviours OR behavioral psychological symptoms OR behavioral and psychological symptoms OR behavioural and psychological symptoms OR BPSD OR BSD OR behavioral problems OR Problem Behavior OR repetitive behavior OR repetitive OR agitation OR pacing OR wander OR wanders OR wandering OR walking OR safe walking OR sundowning OR Night time behavior OR challenging behavior OR disruptive OR restless OR Psychomotor Agitation OR Irritability OR Irritable Mood OR Disinhibition OR aggression OR aggressive OR aberrant OR aberrant motor behavior OR social inappropriateness OR vocalization OR vocalization OR                                                                                                                                                                                                                                                                                                                                                                                                                                                                                                                                                                                                                                                                                                                                                                                                                                                                                                                                                                                                                                                                   |

---

|    |                                                                                                                                                                                                                                                                                                                                                                                                                                                                                               |
|----|-----------------------------------------------------------------------------------------------------------------------------------------------------------------------------------------------------------------------------------------------------------------------------------------------------------------------------------------------------------------------------------------------------------------------------------------------------------------------------------------------|
|    | psychomotor activity OR psychosis OR Psychotic Disorders OR psycho OR psycho social OR neuropsychiatric symptom OR depression OR depressive OR depressive disorder OR mood disturbance OR anxiety OR delusions OR depressive disorder OR hallucination OR Sleep disturbance OR Sleep disorders OR Sleeping disorders OR Sleep Deprivation OR apathy OR Indifference OR dysphoria OR Euphoria OR Elation OR Appetite OR Eating change OR personality change OR behavioural OR neuropsychiatric |
| #5 | MeSH descriptor: [Systematic Review] explode all trees OR MeSH descriptor: [Meta-Analysis] explode all trees OR (systematic review):ti,ab,kw OR (meta analysis):ti,ab,kw OR (meta analysis) OR (systematic review)                                                                                                                                                                                                                                                                            |
| #6 | #1 AND #2 AND #3 AND #4 AND #5 AND #6                                                                                                                                                                                                                                                                                                                                                                                                                                                         |
| #7 | #7 AND (Limit: publication date from Jan 2012 to Mar 2022, limit in Cochrane Reviews)                                                                                                                                                                                                                                                                                                                                                                                                         |

---
